# Supplementary material for: Restoration of locomotor function following stimulation of the A13 region in Parkinson’s mouse models
Source: eLife. 2025 Sep 23;12:RP90832. doi: 10.7554/eLife.90832 (PMC12456956; doi:10.7554/eLife.90832)
Supplement: Figure 1—source data 1. [file elife-90832-fig1-data1.xlsx]

## Sheet: Raw Data
Model	Virus	PercentCount
6-OHDA	ChR2	15.0641
6-OHDA	ChR2	18.5531
6-OHDA	ChR2	8.47213
6-OHDA	ChR2	11.1103
6-OHDA	ChR2	29.112
6-OHDA	eYFP	19.2419
6-OHDA	eYFP	32.4501
6-OHDA	eYFP	29.1921
6-OHDA	eYFP	11.4364
6-OHDA	eYFP	10.0219
Saline	eYFP	97.2241
Saline	eYFP	72.4537
Saline	eYFP	93.9244
Saline	eYFP	124.989
Saline	eYFP	119.53
Saline	ChR2	81.8293
Saline	ChR2	127.118
Saline	ChR2	121.624
Saline	ChR2	86.0544
Saline	ChR2	97.1531
Saline	ChR2	58.9472
Saline	ChR2	117.749

## Sheet: Stats
Two way ANOVA (2 x 2 design)
Tests of Between-Subjects Effects
Dependent Variable: Percent Count
Source	Type III Sum of Squares	df	Mean Square	F	Sig.	Partial Eta Squared	Noncent. Parameter	Observed Powerb
Corrected Model	36223.294a	3	12074.4	35.1119	< 0.001	0.854057	105.336	1
Intercept	75736.1	1	75736.1	220.237	< 0.001	0.924445	220.237	1
Model	35912.1	1	35912.1	104.431	< 0.001	0.852978	104.431	1
Virus	65.7931	1	65.7931	0.191324	0.66702	0.0105173	0.191324	0.0699088
Model * Virus	1.40397	1	1.40397	0.00408268	0.949757	0.000226764	0.00408268	0.0504203
Error	6189.91	18	343.884
Total	129385	22
Corrected Total	42413.2	21
a. R Squared = .854 (Adjusted R Squared = .830)
b. Computed using alpha = .05
