# Supplementary material for: Restoration of locomotor function following stimulation of the A13 region in Parkinson’s mouse models
Source: eLife. 2025 Sep 23;12:RP90832. doi: 10.7554/eLife.90832 (PMC12456956; doi:10.7554/eLife.90832)
Supplement: Figure 2—figure supplement 1—source data 1. [file elife-90832-fig2-figsupp1-data1.xlsx]

## Sheet: Histogram Data
Bin_Edges	Bin_Means_C2G1M3_6-OHDA_CHR2	Bin_Means_C1G3M2_6-OHDA_CHR2	Bin_Means_C1G3M3_6-OHDA_CHR2	Bin_Means_C3G1_1M1_6-OHDA_CHR2	Bin_Means_C3G1_1M3_6-OHDA_CHR2	Bin_Means_C4G0M2(C4L0R2)_6-OHDA_CHR2	Bin_Means_C3G2_0M2_Saline_CHR2	Bin_Means_C4G1M2(C4L1R2)_Saline_CHR2	Bin_Means_C2G4M2_Saline_CHR2	Bin_Means_C3G2_0M3_Saline_CHR2	Bin_Means_C4G1M3(C4L1R3)_Saline_CHR2
-2.66			0.0133693
-2.5255			0.0140545
-2.391		0.0237361	0.015803			0.0700808		0.0312571
-2.2565			0.0145447			0.0772587	0.13254	0.0511322			0.0790293
-2.122			0.0155986	0.0179627		0.0843839	0.0855595	0.0544526	0.0215941	0.0109447	0.0814926
-1.9875	0.0169694	0.0149542	0.0143111		0.0441383	0.077315	0.0538754	0.0489902	0.0175737	0.011693	0.0815571
-1.853			0.0200681	0.0152992	0.0359844	0.111488	0.0588111	0.0689381	0.0154216	0.00783514	0.0945028
-1.7185		0.0147294	0.0222457	0.0343966	0.0434498	0.0880965	0.0443843	0.0610924	0.0133999	0.0232878	0.0926349
-1.584	0.0326148	0.0257418	0.0216507	0.0531426	0.0683892	0.0700279	0.0600467	0.15043	0.0125183	0.0270488	0.0667874
-1.4495			0.0154691	0.0412565	0.077968	0.0853269	0.0687271	0.0752333	0.0126138		0.100415
-1.315		0.0124177	0.0162489	0.0338674	0.0495854	0.100394	0.0434285	0.0899892	0.0173217	0.0129004	0.0764945
-1.1805	0.0246517		0.0173669	0.0651327	0.0918282	0.101896	0.0641268		0.0048093	0.0151136	0.0807089
-1.046	0.0261966	0.0179708	0.0182812			0.0866148	0.0511015	0.0638848	0.0193877	0.00988202
-0.9115	0.0229976	0.0115648		0.0308011		0.10695	0.0461436	0.117775	0.0060221	0.0137753	0.0840875
-0.777			0.0109001	0.038703		0.0938353	0.0417229	0.329463	0.0360089		0.0889162
-0.6425	0.0246432					0.101109	0.0794734	0.132767
-0.508	0.0288261					0.0975012	0.0611809	0.130421			0.0949514
-0.3735	0.0325366			0.0167953		0.0992893	0.0827396	0.121065			0.122006
-0.239											0.102204
-0.1045			0.00595551								0.135138

## Sheet: C2G1M3_6-OHDA_CHR2
ROI Number per Section	Area	FolderPath
1	34249	C:\Users\WhelanImageRig\Desktop\A13_SlideScanner Viral ROI\CHR2-6OHDA\C2G1M3\C2G1M3-A13-Rn1-slide202\Section1
2	1728460	C:\Users\WhelanImageRig\Desktop\A13_SlideScanner Viral ROI\CHR2-6OHDA\C2G1M3\C2G1M3-A13-Rn1-slide202\Section1
1	35112	C:\Users\WhelanImageRig\Desktop\A13_SlideScanner Viral ROI\CHR2-6OHDA\C2G1M3\C2G1M3-A13-Rn1-slide202\Section2
2	7682	C:\Users\WhelanImageRig\Desktop\A13_SlideScanner Viral ROI\CHR2-6OHDA\C2G1M3\C2G1M3-A13-Rn1-slide202\Section2
3	7629	C:\Users\WhelanImageRig\Desktop\A13_SlideScanner Viral ROI\CHR2-6OHDA\C2G1M3\C2G1M3-A13-Rn1-slide202\Section2
4	1648900	C:\Users\WhelanImageRig\Desktop\A13_SlideScanner Viral ROI\CHR2-6OHDA\C2G1M3\C2G1M3-A13-Rn1-slide202\Section2
1	19326	C:\Users\WhelanImageRig\Desktop\A13_SlideScanner Viral ROI\CHR2-6OHDA\C2G1M3\C2G1M3-A13-Rn1-slide202\Section3
2	27556	C:\Users\WhelanImageRig\Desktop\A13_SlideScanner Viral ROI\CHR2-6OHDA\C2G1M3\C2G1M3-A13-Rn1-slide202\Section3
3	30534	C:\Users\WhelanImageRig\Desktop\A13_SlideScanner Viral ROI\CHR2-6OHDA\C2G1M3\C2G1M3-A13-Rn1-slide202\Section3
4	1610634	C:\Users\WhelanImageRig\Desktop\A13_SlideScanner Viral ROI\CHR2-6OHDA\C2G1M3\C2G1M3-A13-Rn1-slide202\Section3
1	45178	C:\Users\WhelanImageRig\Desktop\A13_SlideScanner Viral ROI\CHR2-6OHDA\C2G1M3\C2G1M3-A13_Rn1_slide1_01\Section1
2	2071116	C:\Users\WhelanImageRig\Desktop\A13_SlideScanner Viral ROI\CHR2-6OHDA\C2G1M3\C2G1M3-A13_Rn1_slide1_01\Section1
1	31668	C:\Users\WhelanImageRig\Desktop\A13_SlideScanner Viral ROI\CHR2-6OHDA\C2G1M3\C2G1M3-A13_Rn1_slide1_01\Section2
2	13537	C:\Users\WhelanImageRig\Desktop\A13_SlideScanner Viral ROI\CHR2-6OHDA\C2G1M3\C2G1M3-A13_Rn1_slide1_01\Section2
3	1965641	C:\Users\WhelanImageRig\Desktop\A13_SlideScanner Viral ROI\CHR2-6OHDA\C2G1M3\C2G1M3-A13_Rn1_slide1_01\Section2
1	58813	C:\Users\WhelanImageRig\Desktop\A13_SlideScanner Viral ROI\CHR2-6OHDA\C2G1M3\C2G1M3-A13_Rn1_slide1_01\Section3
2	2040270	C:\Users\WhelanImageRig\Desktop\A13_SlideScanner Viral ROI\CHR2-6OHDA\C2G1M3\C2G1M3-A13_Rn1_slide1_01\Section3
1	29615	C:\Users\WhelanImageRig\Desktop\A13_SlideScanner Viral ROI\CHR2-6OHDA\C2G1M3\C2G1M3-A13_Rn1_slide1_01\Section4
2	1832065	C:\Users\WhelanImageRig\Desktop\A13_SlideScanner Viral ROI\CHR2-6OHDA\C2G1M3\C2G1M3-A13_Rn1_slide1_01\Section4
1	33279	C:\Users\WhelanImageRig\Desktop\A13_SlideScanner Viral ROI\CHR2-6OHDA\C2G1M3\C2G1M3-A13_Rn1_slide1_01\Section5
2	1956704	C:\Users\WhelanImageRig\Desktop\A13_SlideScanner Viral ROI\CHR2-6OHDA\C2G1M3\C2G1M3-A13_Rn1_slide1_01\Section5
1	47004	C:\Users\WhelanImageRig\Desktop\A13_SlideScanner Viral ROI\CHR2-6OHDA\C2G1M3\C2G1M3-A13_Rn1_slide1_01\Section6
2	1907382	C:\Users\WhelanImageRig\Desktop\A13_SlideScanner Viral ROI\CHR2-6OHDA\C2G1M3\C2G1M3-A13_Rn1_slide1_01\Section6
1	50879	C:\Users\WhelanImageRig\Desktop\A13_SlideScanner Viral ROI\CHR2-6OHDA\C2G1M3\C2G1M3_R2S101\Section1
2	1725375	C:\Users\WhelanImageRig\Desktop\A13_SlideScanner Viral ROI\CHR2-6OHDA\C2G1M3\C2G1M3_R2S101\Section1
1	64386	C:\Users\WhelanImageRig\Desktop\A13_SlideScanner Viral ROI\CHR2-6OHDA\C2G1M3\C2G1M3_R2S101\Section2
2	1806712	C:\Users\WhelanImageRig\Desktop\A13_SlideScanner Viral ROI\CHR2-6OHDA\C2G1M3\C2G1M3_R2S101\Section2
1	30661	C:\Users\WhelanImageRig\Desktop\A13_SlideScanner Viral ROI\CHR2-6OHDA\C2G1M3\C2G1M3_R2S101\Section3
2	1806843	C:\Users\WhelanImageRig\Desktop\A13_SlideScanner Viral ROI\CHR2-6OHDA\C2G1M3\C2G1M3_R2S101\Section3
1	23984	C:\Users\WhelanImageRig\Desktop\A13_SlideScanner Viral ROI\CHR2-6OHDA\C2G1M3\C2G1M3_R2S101\Section4
2	842071	C:\Users\WhelanImageRig\Desktop\A13_SlideScanner Viral ROI\CHR2-6OHDA\C2G1M3\C2G1M3_R2S101\Section4
1	73877	C:\Users\WhelanImageRig\Desktop\A13_SlideScanner Viral ROI\CHR2-6OHDA\C2G1M3\C2G1M3_R2S101\Section5
2	7190	C:\Users\WhelanImageRig\Desktop\A13_SlideScanner Viral ROI\CHR2-6OHDA\C2G1M3\C2G1M3_R2S101\Section5
3	1303110	C:\Users\WhelanImageRig\Desktop\A13_SlideScanner Viral ROI\CHR2-6OHDA\C2G1M3\C2G1M3_R2S101\Section5
1	45371	C:\Users\WhelanImageRig\Desktop\A13_SlideScanner Viral ROI\CHR2-6OHDA\C2G1M3\C2G1M3_R2S101\Section6
2	1533189	C:\Users\WhelanImageRig\Desktop\A13_SlideScanner Viral ROI\CHR2-6OHDA\C2G1M3\C2G1M3_R2S101\Section6
Section	Folder	Area of Viral Spread	Area total	Area Percent	AP?
C2G1M1-A13-Rn1-slide202.vsi - C2G1M1-A13-Rn1-slide202.vsi #16.tif	C2G1M3-A13-Rn1-slide202	34249	1728460	0.0198147	-1.07
C2G1M1-A13-Rn1-slide202.vsi - C2G1M1-A13-Rn1-slide202.vsi #22.tif	C2G1M3-A13-Rn1-slide202	50423	1648900	0.0305798	-0.47-0.57
C2G1M1-A13-Rn1-slide202.vsi - C2G1M1-A13-Rn1-slide202.vsi #28.tif	C2G1M3-A13-Rn1-slide202	77416	1610634	0.0480655	-0.27
C2G1M3-A13_Rn1_slide1_01.vsi - C2G1M3-A13_Rn1_slide1_01.vsi #16.tif	C2G1M3-A13_Rn1_slide1_01	45178	2071116	0.0218134	-0.97
C2G1M3-A13_Rn1_slide1_01.vsi - C2G1M3-A13_Rn1_slide1_01.vsi #23.tif	C2G1M3-A13_Rn1_slide1_01	45205	1965641	0.0229976	-0.87
C2G1M3-A13_Rn1_slide1_01.vsi - C2G1M3-A13_Rn1_slide1_01.vsi #29.tif	C2G1M3-A13_Rn1_slide1_01	58813	2040270	0.0288261	-0.47
C2G1M3-A13_Rn1_slide1_01.vsi - C2G1M3-A13_Rn1_slide1_01.vsi #36.tif	C2G1M3-A13_Rn1_slide1_01	29615	1832065	0.0161648	ripped
C2G1M3-A13_Rn1_slide1_01.vsi - C2G1M3-A13_Rn1_slide1_01.vsi #42.tif	C2G1M3-A13_Rn1_slide1_01	33279	1956704	0.0170077	-0.37
C2G1M3-A13_Rn1_slide1_01.vsi - C2G1M3-A13_Rn1_slide1_01.vsi #48.tif	C2G1M3-A13_Rn1_slide1_01	47004	1907382	0.0246432	-0.57
C2G1M3-A13_R2S101.vsi - C2G1M3-A13_R2S101.vsi #16.tif	C2G1M3_R2S101	50879	1725375	0.0294887	-1.07
C2G1M3-A13_R2S101.vsi - C2G1M3-A13_R2S101.vsi #22.tif	C2G1M3_R2S101	64386	1806712	0.0356371	-1.57
C2G1M3-A13_R2S101.vsi - C2G1M3-A13_R2S101.vsi #28.tif	C2G1M3_R2S101	30661	1806843	0.0169694	-1.97
C2G1M3-A13_R2S101.vsi - C2G1M3-A13_R2S101.vsi #34.tif	C2G1M3_R2S101	23984	842071	0.0284822	ripped
C2G1M3-A13_R2S101.vsi - C2G1M3-A13_R2S101.vsi #40.tif	C2G1M3_R2S101	81067	1303110	0.0622104	ripped
C2G1M3-A13_R2S101.vsi - C2G1M3-A13_R2S101.vsi #46.tif	C2G1M3_R2S101	45371	1533189	0.0295926	-1.47

## Sheet: C1G3M2_6-OHDA_CHR2
ROI Number per Section	Area	FolderPath
1	11643	J:\My Drive\A13_SlideScanner Viral ROI\CHR2-6OHDA\C1G3M2\Slide 1\Section1
2	5386	J:\My Drive\A13_SlideScanner Viral ROI\CHR2-6OHDA\C1G3M2\Slide 1\Section1
3	1472480	J:\My Drive\A13_SlideScanner Viral ROI\CHR2-6OHDA\C1G3M2\Slide 1\Section1
1	1610334	J:\My Drive\A13_SlideScanner Viral ROI\CHR2-6OHDA\C1G3M2\Slide 1\Section3
2	23796	J:\My Drive\A13_SlideScanner Viral ROI\CHR2-6OHDA\C1G3M2\Slide 1\Section3
3	5143	J:\My Drive\A13_SlideScanner Viral ROI\CHR2-6OHDA\C1G3M2\Slide 1\Section3
1	1609962	J:\My Drive\A13_SlideScanner Viral ROI\CHR2-6OHDA\C1G3M2\Slide 1\Section5
2	14369	J:\My Drive\A13_SlideScanner Viral ROI\CHR2-6OHDA\C1G3M2\Slide 1\Section5
3	5623	J:\My Drive\A13_SlideScanner Viral ROI\CHR2-6OHDA\C1G3M2\Slide 1\Section5
1	36600	J:\My Drive\A13_SlideScanner Viral ROI\CHR2-6OHDA\C1G3M2\Slide 2\Section1
2	1541957	J:\My Drive\A13_SlideScanner Viral ROI\CHR2-6OHDA\C1G3M2\Slide 2\Section1
1	40445	J:\My Drive\A13_SlideScanner Viral ROI\CHR2-6OHDA\C1G3M2\Slide 2\Section2
2	4929	J:\My Drive\A13_SlideScanner Viral ROI\CHR2-6OHDA\C1G3M2\Slide 2\Section2
3	1762660	J:\My Drive\A13_SlideScanner Viral ROI\CHR2-6OHDA\C1G3M2\Slide 2\Section2
1	25351	J:\My Drive\A13_SlideScanner Viral ROI\CHR2-6OHDA\C1G3M2\Slide 2\Section3
2	4394	J:\My Drive\A13_SlideScanner Viral ROI\CHR2-6OHDA\C1G3M2\Slide 2\Section3
3	1771920	J:\My Drive\A13_SlideScanner Viral ROI\CHR2-6OHDA\C1G3M2\Slide 2\Section3
1	20771	J:\My Drive\A13_SlideScanner Viral ROI\CHR2-6OHDA\C1G3M2\Slide 2\Section4
2	1369	J:\My Drive\A13_SlideScanner Viral ROI\CHR2-6OHDA\C1G3M2\Slide 2\Section4
3	1747165	J:\My Drive\A13_SlideScanner Viral ROI\CHR2-6OHDA\C1G3M2\Slide 2\Section4
1	21656	J:\My Drive\A13_SlideScanner Viral ROI\CHR2-6OHDA\C1G3M2\Slide 2\Section5
2	1905	J:\My Drive\A13_SlideScanner Viral ROI\CHR2-6OHDA\C1G3M2\Slide 2\Section5
3	2938	J:\My Drive\A13_SlideScanner Viral ROI\CHR2-6OHDA\C1G3M2\Slide 2\Section5
4	1772015	J:\My Drive\A13_SlideScanner Viral ROI\CHR2-6OHDA\C1G3M2\Slide 2\Section5
Section	Folder	Area of Viral Spread	Area total	Area Percent	AP?
1	J:\My Drive\A13_SlideScanner Viral ROI\CHR2-6OHDA\C1G3M2\Slide 1	17029	1472480	0.0115648	-0.82
3	J:\My Drive\A13_SlideScanner Viral ROI\CHR2-6OHDA\C1G3M2\Slide 1	28939	1610334	0.0179708	-1
5	J:\My Drive\A13_SlideScanner Viral ROI\CHR2-6OHDA\C1G3M2\Slide 1	19992	1609962	0.0124177	-1.21
1	J:\My Drive\A13_SlideScanner Viral ROI\CHR2-6OHDA\C1G3M2\Slide 2	36600	1541957	0.0237361	-2.26
2	J:\My Drive\A13_SlideScanner Viral ROI\CHR2-6OHDA\C1G3M2\Slide 2	45374	1762660	0.0257418	-1.48
3	J:\My Drive\A13_SlideScanner Viral ROI\CHR2-6OHDA\C1G3M2\Slide 2	29745	1771920	0.0167869	-1.67
4	J:\My Drive\A13_SlideScanner Viral ROI\CHR2-6OHDA\C1G3M2\Slide 2	22140	1747165	0.012672	-1.67
5	J:\My Drive\A13_SlideScanner Viral ROI\CHR2-6OHDA\C1G3M2\Slide 2	26499	1772015	0.0149542	-1.98

## Sheet: C1G3M3_6-OHDA_CHR2
ROI Number per Section	Area	FolderPath
1	0.34	J:\My Drive\A13_SlideScanner Viral ROI\CHR2-6OHDA\C1G3M3\Slide 1\Section1
2	57.09	J:\My Drive\A13_SlideScanner Viral ROI\CHR2-6OHDA\C1G3M3\Slide 1\Section1
1	0.94	J:\My Drive\A13_SlideScanner Viral ROI\CHR2-6OHDA\C1G3M3\Slide 1\Section10
2	0.18	J:\My Drive\A13_SlideScanner Viral ROI\CHR2-6OHDA\C1G3M3\Slide 1\Section10
3	55.81	J:\My Drive\A13_SlideScanner Viral ROI\CHR2-6OHDA\C1G3M3\Slide 1\Section10
1	0.18	J:\My Drive\A13_SlideScanner Viral ROI\CHR2-6OHDA\C1G3M3\Slide 1\Section11
2	0.86	J:\My Drive\A13_SlideScanner Viral ROI\CHR2-6OHDA\C1G3M3\Slide 1\Section11
3	63.31	J:\My Drive\A13_SlideScanner Viral ROI\CHR2-6OHDA\C1G3M3\Slide 1\Section11
1	0.28	J:\My Drive\A13_SlideScanner Viral ROI\CHR2-6OHDA\C1G3M3\Slide 1\Section2
2	0.22	J:\My Drive\A13_SlideScanner Viral ROI\CHR2-6OHDA\C1G3M3\Slide 1\Section2
3	49.55	J:\My Drive\A13_SlideScanner Viral ROI\CHR2-6OHDA\C1G3M3\Slide 1\Section2
1	1.07	J:\My Drive\A13_SlideScanner Viral ROI\CHR2-6OHDA\C1G3M3\Slide 1\Section3
2	0.15	J:\My Drive\A13_SlideScanner Viral ROI\CHR2-6OHDA\C1G3M3\Slide 1\Section3
3	54.36	J:\My Drive\A13_SlideScanner Viral ROI\CHR2-6OHDA\C1G3M3\Slide 1\Section3
1	0.93	J:\My Drive\A13_SlideScanner Viral ROI\CHR2-6OHDA\C1G3M3\Slide 1\Section4
2	0.14	J:\My Drive\A13_SlideScanner Viral ROI\CHR2-6OHDA\C1G3M3\Slide 1\Section4
3	58.53	J:\My Drive\A13_SlideScanner Viral ROI\CHR2-6OHDA\C1G3M3\Slide 1\Section4
1	0.21	J:\My Drive\A13_SlideScanner Viral ROI\CHR2-6OHDA\C1G3M3\Slide 1\Section5
2	1.03	J:\My Drive\A13_SlideScanner Viral ROI\CHR2-6OHDA\C1G3M3\Slide 1\Section5
3	55.34	J:\My Drive\A13_SlideScanner Viral ROI\CHR2-6OHDA\C1G3M3\Slide 1\Section5
1	0.6	J:\My Drive\A13_SlideScanner Viral ROI\CHR2-6OHDA\C1G3M3\Slide 1\Section6
2	0.14	J:\My Drive\A13_SlideScanner Viral ROI\CHR2-6OHDA\C1G3M3\Slide 1\Section6
3	60.68	J:\My Drive\A13_SlideScanner Viral ROI\CHR2-6OHDA\C1G3M3\Slide 1\Section6
1	0.52	J:\My Drive\A13_SlideScanner Viral ROI\CHR2-6OHDA\C1G3M3\Slide 1\Section7
2	0.14	J:\My Drive\A13_SlideScanner Viral ROI\CHR2-6OHDA\C1G3M3\Slide 1\Section7
3	0.39	J:\My Drive\A13_SlideScanner Viral ROI\CHR2-6OHDA\C1G3M3\Slide 1\Section7
4	60.46	J:\My Drive\A13_SlideScanner Viral ROI\CHR2-6OHDA\C1G3M3\Slide 1\Section7
1	1.16	J:\My Drive\A13_SlideScanner Viral ROI\CHR2-6OHDA\C1G3M3\Slide 1\Section9
2	0.17	J:\My Drive\A13_SlideScanner Viral ROI\CHR2-6OHDA\C1G3M3\Slide 1\Section9
3	61.43	J:\My Drive\A13_SlideScanner Viral ROI\CHR2-6OHDA\C1G3M3\Slide 1\Section9
1	1.14	J:\My Drive\A13_SlideScanner Viral ROI\CHR2-6OHDA\C1G3M3\Slide 1\section8
2	0.35	J:\My Drive\A13_SlideScanner Viral ROI\CHR2-6OHDA\C1G3M3\Slide 1\section8
3	66.34	J:\My Drive\A13_SlideScanner Viral ROI\CHR2-6OHDA\C1G3M3\Slide 1\section8
1	19700	J:\My Drive\A13_SlideScanner Viral ROI\CHR2-6OHDA\C1G3M3\Slide 2\Section1
2	1900157	J:\My Drive\A13_SlideScanner Viral ROI\CHR2-6OHDA\C1G3M3\Slide 2\Section1
1	29806	J:\My Drive\A13_SlideScanner Viral ROI\CHR2-6OHDA\C1G3M3\Slide 2\Section2
2	1906294	J:\My Drive\A13_SlideScanner Viral ROI\CHR2-6OHDA\C1G3M3\Slide 2\Section2
1	12300	J:\My Drive\A13_SlideScanner Viral ROI\CHR2-6OHDA\C1G3M3\Slide 2\Section3
2	11986	J:\My Drive\A13_SlideScanner Viral ROI\CHR2-6OHDA\C1G3M3\Slide 2\Section3
3	1814925	J:\My Drive\A13_SlideScanner Viral ROI\CHR2-6OHDA\C1G3M3\Slide 2\Section3
1	9903	J:\My Drive\A13_SlideScanner Viral ROI\CHR2-6OHDA\C1G3M3\Slide 2\Section4
2	9361	J:\My Drive\A13_SlideScanner Viral ROI\CHR2-6OHDA\C1G3M3\Slide 2\Section4
3	1820286	J:\My Drive\A13_SlideScanner Viral ROI\CHR2-6OHDA\C1G3M3\Slide 2\Section4
1	29834	J:\My Drive\A13_SlideScanner Viral ROI\CHR2-6OHDA\C1G3M3\Slide 2\Section5
2	5871	J:\My Drive\A13_SlideScanner Viral ROI\CHR2-6OHDA\C1G3M3\Slide 2\Section5
3	1857260	J:\My Drive\A13_SlideScanner Viral ROI\CHR2-6OHDA\C1G3M3\Slide 2\Section5
1	23679	J:\My Drive\A13_SlideScanner Viral ROI\CHR2-6OHDA\C1G3M3\Slide 2\Section6
2	1898360	J:\My Drive\A13_SlideScanner Viral ROI\CHR2-6OHDA\C1G3M3\Slide 2\Section6
1	8858	J:\My Drive\A13_SlideScanner Viral ROI\CHR2-6OHDA\C1G3M3\Slide 2\Section7
2	1596311	J:\My Drive\A13_SlideScanner Viral ROI\CHR2-6OHDA\C1G3M3\Slide 2\Section7
3	8542	J:\My Drive\A13_SlideScanner Viral ROI\CHR2-6OHDA\C1G3M3\Slide 2\Section7
1	43578	J:\My Drive\A13_SlideScanner Viral ROI\CHR2-6OHDA\C1G3M3\Slide 2\Section8
2	5276	J:\My Drive\A13_SlideScanner Viral ROI\CHR2-6OHDA\C1G3M3\Slide 2\Section8
3	1950072	J:\My Drive\A13_SlideScanner Viral ROI\CHR2-6OHDA\C1G3M3\Slide 2\Section8
1	0.96	J:\My Drive\A13_SlideScanner Viral ROI\CHR2-6OHDA\C1G3M3\Slide 3\Section1
2	58.64	J:\My Drive\A13_SlideScanner Viral ROI\CHR2-6OHDA\C1G3M3\Slide 3\Section1
1	1.03	J:\My Drive\A13_SlideScanner Viral ROI\CHR2-6OHDA\C1G3M3\Slide 3\Section2
2	0.15	J:\My Drive\A13_SlideScanner Viral ROI\CHR2-6OHDA\C1G3M3\Slide 3\Section2
3	60.81	J:\My Drive\A13_SlideScanner Viral ROI\CHR2-6OHDA\C1G3M3\Slide 3\Section2
1	0.59	J:\My Drive\A13_SlideScanner Viral ROI\CHR2-6OHDA\C1G3M3\Slide 3\Section3
2	0.13	J:\My Drive\A13_SlideScanner Viral ROI\CHR2-6OHDA\C1G3M3\Slide 3\Section3
3	59.01	J:\My Drive\A13_SlideScanner Viral ROI\CHR2-6OHDA\C1G3M3\Slide 3\Section3
1	0.71	J:\My Drive\A13_SlideScanner Viral ROI\CHR2-6OHDA\C1G3M3\Slide 3\Section4
2	0.12	J:\My Drive\A13_SlideScanner Viral ROI\CHR2-6OHDA\C1G3M3\Slide 3\Section4
3	53.21	J:\My Drive\A13_SlideScanner Viral ROI\CHR2-6OHDA\C1G3M3\Slide 3\Section4
1	0.63	J:\My Drive\A13_SlideScanner Viral ROI\CHR2-6OHDA\C1G3M3\Slide 3\Section5
2	0.1	J:\My Drive\A13_SlideScanner Viral ROI\CHR2-6OHDA\C1G3M3\Slide 3\Section5
3	50.19	J:\My Drive\A13_SlideScanner Viral ROI\CHR2-6OHDA\C1G3M3\Slide 3\Section5
Section	Folder	Area of Viral Spread	Area total	Area Percent	AP?
1	J:\My Drive\A13_SlideScanner Viral ROI\CHR2-6OHDA\C1G3M3\Slide 1	0.34	57.09	0.00595551	-0.06
2	J:\My Drive\A13_SlideScanner Viral ROI\CHR2-6OHDA\C1G3M3\Slide 1	0.5	49.55	0.0100908	-1.2
3	J:\My Drive\A13_SlideScanner Viral ROI\CHR2-6OHDA\C1G3M3\Slide 1	1.22	54.36	0.022443	-1.35
4	J:\My Drive\A13_SlideScanner Viral ROI\CHR2-6OHDA\C1G3M3\Slide 1	1.07	58.53	0.0182812	-1
5	J:\My Drive\A13_SlideScanner Viral ROI\CHR2-6OHDA\C1G3M3\Slide 1	1.24	55.34	0.0224069	-1.19
6	J:\My Drive\A13_SlideScanner Viral ROI\CHR2-6OHDA\C1G3M3\Slide 1	0.74	60.68	0.0121951	-1.89
7	J:\My Drive\A13_SlideScanner Viral ROI\CHR2-6OHDA\C1G3M3\Slide 1	1.05	60.46	0.0173669	-1.12
8	J:\My Drive\A13_SlideScanner Viral ROI\CHR2-6OHDA\C1G3M3\Slide 1	1.49	66.34	0.0224601	-1.65
9	J:\My Drive\A13_SlideScanner Viral ROI\CHR2-6OHDA\C1G3M3\Slide 1	1.33	61.43	0.0216507	-1.47
10	J:\My Drive\A13_SlideScanner Viral ROI\CHR2-6OHDA\C1G3M3\Slide 1	1.12	55.81	0.0200681	-1.75
11	J:\My Drive\A13_SlideScanner Viral ROI\CHR2-6OHDA\C1G3M3\Slide 1	1.04	63.31	0.0164271	-1.96
1	J:\My Drive\A13_SlideScanner Viral ROI\CHR2-6OHDA\C1G3M3\Slide 2	19700	1900157	0.0103676	-2.66
2	J:\My Drive\A13_SlideScanner Viral ROI\CHR2-6OHDA\C1G3M3\Slide 2	29806	1906294	0.0156356	-2.45
3	J:\My Drive\A13_SlideScanner Viral ROI\CHR2-6OHDA\C1G3M3\Slide 2	24286	1814925	0.0133813	-1.42
4	J:\My Drive\A13_SlideScanner Viral ROI\CHR2-6OHDA\C1G3M3\Slide 2	19264	1820286	0.010583	-1.35
5	J:\My Drive\A13_SlideScanner Viral ROI\CHR2-6OHDA\C1G3M3\Slide 2	35705	1857260	0.0192246	-1.66
6	J:\My Drive\A13_SlideScanner Viral ROI\CHR2-6OHDA\C1G3M3\Slide 2	23679	1898360	0.0124734	-2.41
7	J:\My Drive\A13_SlideScanner Viral ROI\CHR2-6OHDA\C1G3M3\Slide 2	17400	1596311	0.0109001	-0.69
8	J:\My Drive\A13_SlideScanner Viral ROI\CHR2-6OHDA\C1G3M3\Slide 2	48854	1950072	0.0250524	-1.67
1	J:\My Drive\A13_SlideScanner Viral ROI\CHR2-6OHDA\C1G3M3\Slide 3	0.96	58.64	0.0163711	-2.54
2	J:\My Drive\A13_SlideScanner Viral ROI\CHR2-6OHDA\C1G3M3\Slide 3	1.18	60.81	0.0194047	-2.27
3	J:\My Drive\A13_SlideScanner Viral ROI\CHR2-6OHDA\C1G3M3\Slide 3	0.72	59.01	0.0122013	-2.33
4	J:\My Drive\A13_SlideScanner Viral ROI\CHR2-6OHDA\C1G3M3\Slide 3	0.83	53.21	0.0155986	-2.12
5	J:\My Drive\A13_SlideScanner Viral ROI\CHR2-6OHDA\C1G3M3\Slide 3	0.73	50.19	0.0145447	-2.13

## Sheet: C3G1_1M1_6-OHDA_CHR2
ROI Number per Section	Area	FolderPath
1	78837	J:\My Drive\A13_SlideScanner Viral ROI\CHR2-6OHDA\C3G1_1M1\Slide 1\Section1
2	13396	J:\My Drive\A13_SlideScanner Viral ROI\CHR2-6OHDA\C3G1_1M1\Slide 1\Section1
3	8864	J:\My Drive\A13_SlideScanner Viral ROI\CHR2-6OHDA\C3G1_1M1\Slide 1\Section1
4	1589196	J:\My Drive\A13_SlideScanner Viral ROI\CHR2-6OHDA\C3G1_1M1\Slide 1\Section1
1	24832	J:\My Drive\A13_SlideScanner Viral ROI\CHR2-6OHDA\C3G1_1M1\Slide 1\Section10
2	1478508	J:\My Drive\A13_SlideScanner Viral ROI\CHR2-6OHDA\C3G1_1M1\Slide 1\Section10
1	28668	J:\My Drive\A13_SlideScanner Viral ROI\CHR2-6OHDA\C3G1_1M1\Slide 1\Section2
2	1595970	J:\My Drive\A13_SlideScanner Viral ROI\CHR2-6OHDA\C3G1_1M1\Slide 1\Section2
1	44449	J:\My Drive\A13_SlideScanner Viral ROI\CHR2-6OHDA\C3G1_1M1\Slide 1\Section3
2	1520857	J:\My Drive\A13_SlideScanner Viral ROI\CHR2-6OHDA\C3G1_1M1\Slide 1\Section3
3	7023	J:\My Drive\A13_SlideScanner Viral ROI\CHR2-6OHDA\C3G1_1M1\Slide 1\Section3
1	48106	J:\My Drive\A13_SlideScanner Viral ROI\CHR2-6OHDA\C3G1_1M1\Slide 1\Section4
2	6632	J:\My Drive\A13_SlideScanner Viral ROI\CHR2-6OHDA\C3G1_1M1\Slide 1\Section4
3	11231	J:\My Drive\A13_SlideScanner Viral ROI\CHR2-6OHDA\C3G1_1M1\Slide 1\Section4
4	10723	J:\My Drive\A13_SlideScanner Viral ROI\CHR2-6OHDA\C3G1_1M1\Slide 1\Section4
5	1578001	J:\My Drive\A13_SlideScanner Viral ROI\CHR2-6OHDA\C3G1_1M1\Slide 1\Section4
1	27313	J:\My Drive\A13_SlideScanner Viral ROI\CHR2-6OHDA\C3G1_1M1\Slide 1\Section5
2	1599229	J:\My Drive\A13_SlideScanner Viral ROI\CHR2-6OHDA\C3G1_1M1\Slide 1\Section5
1	36419	J:\My Drive\A13_SlideScanner Viral ROI\CHR2-6OHDA\C3G1_1M1\Slide 1\Section6
2	2179	J:\My Drive\A13_SlideScanner Viral ROI\CHR2-6OHDA\C3G1_1M1\Slide 1\Section6
3	4704	J:\My Drive\A13_SlideScanner Viral ROI\CHR2-6OHDA\C3G1_1M1\Slide 1\Section6
4	3211	J:\My Drive\A13_SlideScanner Viral ROI\CHR2-6OHDA\C3G1_1M1\Slide 1\Section6
5	8455	J:\My Drive\A13_SlideScanner Viral ROI\CHR2-6OHDA\C3G1_1M1\Slide 1\Section6
6	1598063	J:\My Drive\A13_SlideScanner Viral ROI\CHR2-6OHDA\C3G1_1M1\Slide 1\Section6
1	1513157	J:\My Drive\A13_SlideScanner Viral ROI\CHR2-6OHDA\C3G1_1M1\Slide 1\Section7
2	1858	J:\My Drive\A13_SlideScanner Viral ROI\CHR2-6OHDA\C3G1_1M1\Slide 1\Section7
3	2634	J:\My Drive\A13_SlideScanner Viral ROI\CHR2-6OHDA\C3G1_1M1\Slide 1\Section7
4	94064	J:\My Drive\A13_SlideScanner Viral ROI\CHR2-6OHDA\C3G1_1M1\Slide 1\Section7
1	1623317	J:\My Drive\A13_SlideScanner Viral ROI\CHR2-6OHDA\C3G1_1M1\Slide 1\Section8
2	56746	J:\My Drive\A13_SlideScanner Viral ROI\CHR2-6OHDA\C3G1_1M1\Slide 1\Section8
3	6722	J:\My Drive\A13_SlideScanner Viral ROI\CHR2-6OHDA\C3G1_1M1\Slide 1\Section8
4	5799	J:\My Drive\A13_SlideScanner Viral ROI\CHR2-6OHDA\C3G1_1M1\Slide 1\Section8
1	1590848	J:\My Drive\A13_SlideScanner Viral ROI\CHR2-6OHDA\C3G1_1M1\Slide 1\Section9
2	36807	J:\My Drive\A13_SlideScanner Viral ROI\CHR2-6OHDA\C3G1_1M1\Slide 1\Section9
1	46575	J:\My Drive\A13_SlideScanner Viral ROI\CHR2-6OHDA\C3G1_1M1\Slide 2\Section1
2	5190	J:\My Drive\A13_SlideScanner Viral ROI\CHR2-6OHDA\C3G1_1M1\Slide 2\Section1
3	1939	J:\My Drive\A13_SlideScanner Viral ROI\CHR2-6OHDA\C3G1_1M1\Slide 2\Section1
4	1743572	J:\My Drive\A13_SlideScanner Viral ROI\CHR2-6OHDA\C3G1_1M1\Slide 2\Section1
1	1700965	J:\My Drive\A13_SlideScanner Viral ROI\CHR2-6OHDA\C3G1_1M1\Slide 2\Section2
2	57952	J:\My Drive\A13_SlideScanner Viral ROI\CHR2-6OHDA\C3G1_1M1\Slide 2\Section2
3	12233	J:\My Drive\A13_SlideScanner Viral ROI\CHR2-6OHDA\C3G1_1M1\Slide 2\Section2
4	7575	J:\My Drive\A13_SlideScanner Viral ROI\CHR2-6OHDA\C3G1_1M1\Slide 2\Section2
1	1711878	J:\My Drive\A13_SlideScanner Viral ROI\CHR2-6OHDA\C3G1_1M1\Slide 2\Slide 3
2	54901	J:\My Drive\A13_SlideScanner Viral ROI\CHR2-6OHDA\C3G1_1M1\Slide 2\Slide 3
3	15842	J:\My Drive\A13_SlideScanner Viral ROI\CHR2-6OHDA\C3G1_1M1\Slide 2\Slide 3
1	1720643	J:\My Drive\A13_SlideScanner Viral ROI\CHR2-6OHDA\C3G1_1M1\Slide 2\Slide 4
2	62663	J:\My Drive\A13_SlideScanner Viral ROI\CHR2-6OHDA\C3G1_1M1\Slide 2\Slide 4
3	3931	J:\My Drive\A13_SlideScanner Viral ROI\CHR2-6OHDA\C3G1_1M1\Slide 2\Slide 4
1	1814263	J:\My Drive\A13_SlideScanner Viral ROI\CHR2-6OHDA\C3G1_1M1\Slide 2\Slide 5
2	23867	J:\My Drive\A13_SlideScanner Viral ROI\CHR2-6OHDA\C3G1_1M1\Slide 2\Slide 5
3	661	J:\My Drive\A13_SlideScanner Viral ROI\CHR2-6OHDA\C3G1_1M1\Slide 2\Slide 5
Section	Folder	Area of Viral Spread	Area total	Area Percent	AP?
1	J:\My Drive\A13_SlideScanner Viral ROI\CHR2-6OHDA\C3G1_1M1\Slide 1	101097	1589196	0.0636152	-1.58
2	J:\My Drive\A13_SlideScanner Viral ROI\CHR2-6OHDA\C3G1_1M1\Slide 1	28668	1595970	0.0179627	-2
3	J:\My Drive\A13_SlideScanner Viral ROI\CHR2-6OHDA\C3G1_1M1\Slide 1	51472	1520857	0.0338441	-1.36
4	J:\My Drive\A13_SlideScanner Viral ROI\CHR2-6OHDA\C3G1_1M1\Slide 1	76692	1578001	0.0486007	-1.37
5	J:\My Drive\A13_SlideScanner Viral ROI\CHR2-6OHDA\C3G1_1M1\Slide 1	27313	1599229	0.0170789	-1.82
6	J:\My Drive\A13_SlideScanner Viral ROI\CHR2-6OHDA\C3G1_1M1\Slide 1	54968	1598063	0.0343966	-1.71
7	J:\My Drive\A13_SlideScanner Viral ROI\CHR2-6OHDA\C3G1_1M1\Slide 1	98556	1513157	0.0651327	-1.05
8	J:\My Drive\A13_SlideScanner Viral ROI\CHR2-6OHDA\C3G1_1M1\Slide 1	69267	1623317	0.04267	-1.49
9	J:\My Drive\A13_SlideScanner Viral ROI\CHR2-6OHDA\C3G1_1M1\Slide 1	36807	1590848	0.0231367	-1.2
10	J:\My Drive\A13_SlideScanner Viral ROI\CHR2-6OHDA\C3G1_1M1\Slide 1	24832	1478508	0.0167953	-0.24
1	J:\My Drive\A13_SlideScanner Viral ROI\CHR2-6OHDA\C3G1_1M1\Slide 2	53704	1743572	0.0308011	-0.81
2	J:\My Drive\A13_SlideScanner Viral ROI\CHR2-6OHDA\C3G1_1M1\Slide 2	77760	1743572	0.0445981	-1.22
3	J:\My Drive\A13_SlideScanner Viral ROI\CHR2-6OHDA\C3G1_1M1\Slide 2	70743	1711878	0.0413248	-1.32
4	J:\My Drive\A13_SlideScanner Viral ROI\CHR2-6OHDA\C3G1_1M1\Slide 2	66594	1720643	0.038703	-0.68
5	J:\My Drive\A13_SlideScanner Viral ROI\CHR2-6OHDA\C3G1_1M1\Slide 2	24528	1814263	0.0135195	-1.81

## Sheet: C3G1_1M3_6-OHDA_CHR2
ROI Number per Section	Area	FolderPath
1	77380	C:\Users\WhelanImageRig\Desktop\A13_SlideScanner Viral ROI\CHR2-6OHDA\C3G1_1M3\R1S101\Section1
2	23781	C:\Users\WhelanImageRig\Desktop\A13_SlideScanner Viral ROI\CHR2-6OHDA\C3G1_1M3\R1S101\Section1
3	21769	C:\Users\WhelanImageRig\Desktop\A13_SlideScanner Viral ROI\CHR2-6OHDA\C3G1_1M3\R1S101\Section1
4	2494	C:\Users\WhelanImageRig\Desktop\A13_SlideScanner Viral ROI\CHR2-6OHDA\C3G1_1M3\R1S101\Section1
5	1505456	C:\Users\WhelanImageRig\Desktop\A13_SlideScanner Viral ROI\CHR2-6OHDA\C3G1_1M3\R1S101\Section1
1	26420	C:\Users\WhelanImageRig\Desktop\A13_SlideScanner Viral ROI\CHR2-6OHDA\C3G1_1M3\R1S101\Section2
2	8873	C:\Users\WhelanImageRig\Desktop\A13_SlideScanner Viral ROI\CHR2-6OHDA\C3G1_1M3\R1S101\Section2
3	73605	C:\Users\WhelanImageRig\Desktop\A13_SlideScanner Viral ROI\CHR2-6OHDA\C3G1_1M3\R1S101\Section2
4	1460969	C:\Users\WhelanImageRig\Desktop\A13_SlideScanner Viral ROI\CHR2-6OHDA\C3G1_1M3\R1S101\Section2
1	119975	C:\Users\WhelanImageRig\Desktop\A13_SlideScanner Viral ROI\CHR2-6OHDA\C3G1_1M3\R1S101\Section3
2	18650	C:\Users\WhelanImageRig\Desktop\A13_SlideScanner Viral ROI\CHR2-6OHDA\C3G1_1M3\R1S101\Section3
3	2307	C:\Users\WhelanImageRig\Desktop\A13_SlideScanner Viral ROI\CHR2-6OHDA\C3G1_1M3\R1S101\Section3
4	1384	C:\Users\WhelanImageRig\Desktop\A13_SlideScanner Viral ROI\CHR2-6OHDA\C3G1_1M3\R1S101\Section3
5	1552417	C:\Users\WhelanImageRig\Desktop\A13_SlideScanner Viral ROI\CHR2-6OHDA\C3G1_1M3\R1S101\Section3
1	59285	C:\Users\WhelanImageRig\Desktop\A13_SlideScanner Viral ROI\CHR2-6OHDA\C3G1_1M3\R1S101\Section4
2	28264	C:\Users\WhelanImageRig\Desktop\A13_SlideScanner Viral ROI\CHR2-6OHDA\C3G1_1M3\R1S101\Section4
3	8720	C:\Users\WhelanImageRig\Desktop\A13_SlideScanner Viral ROI\CHR2-6OHDA\C3G1_1M3\R1S101\Section4
4	1506863	C:\Users\WhelanImageRig\Desktop\A13_SlideScanner Viral ROI\CHR2-6OHDA\C3G1_1M3\R1S101\Section4
1	48237	C:\Users\WhelanImageRig\Desktop\A13_SlideScanner Viral ROI\CHR2-6OHDA\C3G1_1M3\R1S101\Section5
2	8965	C:\Users\WhelanImageRig\Desktop\A13_SlideScanner Viral ROI\CHR2-6OHDA\C3G1_1M3\R1S101\Section5
3	35684	C:\Users\WhelanImageRig\Desktop\A13_SlideScanner Viral ROI\CHR2-6OHDA\C3G1_1M3\R1S101\Section5
4	1567681	C:\Users\WhelanImageRig\Desktop\A13_SlideScanner Viral ROI\CHR2-6OHDA\C3G1_1M3\R1S101\Section5
1	54863	C:\Users\WhelanImageRig\Desktop\A13_SlideScanner Viral ROI\CHR2-6OHDA\C3G1_1M3\R2S101\Section1
2	10111	C:\Users\WhelanImageRig\Desktop\A13_SlideScanner Viral ROI\CHR2-6OHDA\C3G1_1M3\R2S101\Section1
3	1805614	C:\Users\WhelanImageRig\Desktop\A13_SlideScanner Viral ROI\CHR2-6OHDA\C3G1_1M3\R2S101\Section1
1	79140	C:\Users\WhelanImageRig\Desktop\A13_SlideScanner Viral ROI\CHR2-6OHDA\C3G1_1M3\R2S101\Section2
2	20967	C:\Users\WhelanImageRig\Desktop\A13_SlideScanner Viral ROI\CHR2-6OHDA\C3G1_1M3\R2S101\Section2
3	2194	C:\Users\WhelanImageRig\Desktop\A13_SlideScanner Viral ROI\CHR2-6OHDA\C3G1_1M3\R2S101\Section2
4	26430	C:\Users\WhelanImageRig\Desktop\A13_SlideScanner Viral ROI\CHR2-6OHDA\C3G1_1M3\R2S101\Section2
5	1692649	C:\Users\WhelanImageRig\Desktop\A13_SlideScanner Viral ROI\CHR2-6OHDA\C3G1_1M3\R2S101\Section2
1	66372	C:\Users\WhelanImageRig\Desktop\A13_SlideScanner Viral ROI\CHR2-6OHDA\C3G1_1M3\R2S101\Section3
2	4355	C:\Users\WhelanImageRig\Desktop\A13_SlideScanner Viral ROI\CHR2-6OHDA\C3G1_1M3\R2S101\Section3
3	15172	C:\Users\WhelanImageRig\Desktop\A13_SlideScanner Viral ROI\CHR2-6OHDA\C3G1_1M3\R2S101\Section3
4	1816739	C:\Users\WhelanImageRig\Desktop\A13_SlideScanner Viral ROI\CHR2-6OHDA\C3G1_1M3\R2S101\Section3
1	94090	C:\Users\WhelanImageRig\Desktop\A13_SlideScanner Viral ROI\CHR2-6OHDA\C3G1_1M3\R2S101\Section4
2	1356	C:\Users\WhelanImageRig\Desktop\A13_SlideScanner Viral ROI\CHR2-6OHDA\C3G1_1M3\R2S101\Section4
3	24710	C:\Users\WhelanImageRig\Desktop\A13_SlideScanner Viral ROI\CHR2-6OHDA\C3G1_1M3\R2S101\Section4
4	20626	C:\Users\WhelanImageRig\Desktop\A13_SlideScanner Viral ROI\CHR2-6OHDA\C3G1_1M3\R2S101\Section4
5	1716225	C:\Users\WhelanImageRig\Desktop\A13_SlideScanner Viral ROI\CHR2-6OHDA\C3G1_1M3\R2S101\Section4
1	65500	C:\Users\WhelanImageRig\Desktop\A13_SlideScanner Viral ROI\CHR2-6OHDA\C3G1_1M3\R2S101\Section5
2	11816	C:\Users\WhelanImageRig\Desktop\A13_SlideScanner Viral ROI\CHR2-6OHDA\C3G1_1M3\R2S101\Section5
3	1779432	C:\Users\WhelanImageRig\Desktop\A13_SlideScanner Viral ROI\CHR2-6OHDA\C3G1_1M3\R2S101\Section5
1	60005	C:\Users\WhelanImageRig\Desktop\A13_SlideScanner Viral ROI\CHR2-6OHDA\C3G1_1M3\R2S101\Section6
2	11109	C:\Users\WhelanImageRig\Desktop\A13_SlideScanner Viral ROI\CHR2-6OHDA\C3G1_1M3\R2S101\Section6
3	1734713	C:\Users\WhelanImageRig\Desktop\A13_SlideScanner Viral ROI\CHR2-6OHDA\C3G1_1M3\R2S101\Section6
1	67106	C:\Users\WhelanImageRig\Desktop\A13_SlideScanner Viral ROI\CHR2-6OHDA\C3G1_1M3\R2S101\Section7
2	6291	C:\Users\WhelanImageRig\Desktop\A13_SlideScanner Viral ROI\CHR2-6OHDA\C3G1_1M3\R2S101\Section7
3	7710	C:\Users\WhelanImageRig\Desktop\A13_SlideScanner Viral ROI\CHR2-6OHDA\C3G1_1M3\R2S101\Section7
4	5849	C:\Users\WhelanImageRig\Desktop\A13_SlideScanner Viral ROI\CHR2-6OHDA\C3G1_1M3\R2S101\Section7
5	1753663	C:\Users\WhelanImageRig\Desktop\A13_SlideScanner Viral ROI\CHR2-6OHDA\C3G1_1M3\R2S101\Section7
1	123942	C:\Users\WhelanImageRig\Desktop\A13_SlideScanner Viral ROI\CHR2-6OHDA\C3G1_1M3\R2S101\Section8
2	19420	C:\Users\WhelanImageRig\Desktop\A13_SlideScanner Viral ROI\CHR2-6OHDA\C3G1_1M3\R2S101\Section8
3	4014	C:\Users\WhelanImageRig\Desktop\A13_SlideScanner Viral ROI\CHR2-6OHDA\C3G1_1M3\R2S101\Section8
4	3709	C:\Users\WhelanImageRig\Desktop\A13_SlideScanner Viral ROI\CHR2-6OHDA\C3G1_1M3\R2S101\Section8
5	1642540	C:\Users\WhelanImageRig\Desktop\A13_SlideScanner Viral ROI\CHR2-6OHDA\C3G1_1M3\R2S101\Section8
Section	Folder	Area of Viral Spread	Area total	Area Percent	AP?
C3G1_1M3_A13_R1S101.vsi - C3G1_1M3_A13_R1S101.vsi #16.tif	R1S101	125424	1505456	0.083313	-1.37
C3G1_1M3_A13_R1S101.vsi - C3G1_1M3_A13_R1S101.vsi #22.tif	R1S101	108898	1460969	0.0745382	-0.67-(-0.77)
C3G1_1M3_A13_R1S101.vsi - C3G1_1M3_A13_R1S101.vsi #28.tif	R1S101	142316	1552417	0.0916738	-1.17
C3G1_1M3_A13_R1S101.vsi - C3G1_1M3_A13_R1S101.vsi #34.tif	R1S101	96269	1506863	0.063887	-1.47
C3G1_1M3_A13_R1S101.vsi - C3G1_1M3_A13_R1S101.vsi #40.tif	R1S101	92886	1567681	0.0592506	-1.57
C3G1_1M3-A13_R2S101.vsi - C3G1_1M3-A13_R2S101.vsi #16.tif	R2S101	64974	1805614	0.0359844	-1.77
C3G1_1M3-A13_R2S101.vsi - C3G1_1M3-A13_R2S101.vsi #22.tif	R2S101	128731	1692649	0.076053	-1.37
C3G1_1M3-A13_R2S101.vsi - C3G1_1M3-A13_R2S101.vsi #28.tif	R2S101	85899	1816739	0.047282	-1.87
C3G1_1M3-A13_R2S101.vsi - C3G1_1M3-A13_R2S101.vsi #34.tif	R2S101	140782	1716225	0.08203	-1.47
C3G1_1M3-A13_R2S101.vsi - C3G1_1M3-A13_R2S101.vsi #40.tif	R2S101	77316	1779432	0.0434498	-1.67
C3G1_1M3-A13_R2S101.vsi - C3G1_1M3-A13_R2S101.vsi #46.tif	R2S101	71114	1734713	0.0409947	-1.87
C3G1_1M3-A13_R2S101.vsi - C3G1_1M3-A13_R2S101.vsi #52.tif	R2S101	86956	1753663	0.0495854	-1.27
C3G1_1M3-A13_R2S101.vsi - C3G1_1M3-A13_R2S101.vsi #58.tif	R2S101	151085	1642540	0.0919825	-1.07

## Sheet: C4G0M2(C4L0R2)_6-OHDA_CHR2
ROI Number per Section	Area	FolderPath
1	129079	C:\Users\WhelanImageRig\Desktop\A13_SlideScanner Viral ROI\CHR2-6OHDA\C4G0M2(C4L0R2)\R1S101\Section1
2	10238	C:\Users\WhelanImageRig\Desktop\A13_SlideScanner Viral ROI\CHR2-6OHDA\C4G0M2(C4L0R2)\R1S101\Section1
3	1168351	C:\Users\WhelanImageRig\Desktop\A13_SlideScanner Viral ROI\CHR2-6OHDA\C4G0M2(C4L0R2)\R1S101\Section1
1	165991	C:\Users\WhelanImageRig\Desktop\A13_SlideScanner Viral ROI\CHR2-6OHDA\C4G0M2(C4L0R2)\R1S101\Section2
2	1401936	C:\Users\WhelanImageRig\Desktop\A13_SlideScanner Viral ROI\CHR2-6OHDA\C4G0M2(C4L0R2)\R1S101\Section2
1	86814	C:\Users\WhelanImageRig\Desktop\A13_SlideScanner Viral ROI\CHR2-6OHDA\C4G0M2(C4L0R2)\R1S101\Section3
2	55215	C:\Users\WhelanImageRig\Desktop\A13_SlideScanner Viral ROI\CHR2-6OHDA\C4G0M2(C4L0R2)\R1S101\Section3
3	1404718	C:\Users\WhelanImageRig\Desktop\A13_SlideScanner Viral ROI\CHR2-6OHDA\C4G0M2(C4L0R2)\R1S101\Section3
1	92069	C:\Users\WhelanImageRig\Desktop\A13_SlideScanner Viral ROI\CHR2-6OHDA\C4G0M2(C4L0R2)\R1S101\Section4
2	1423826	C:\Users\WhelanImageRig\Desktop\A13_SlideScanner Viral ROI\CHR2-6OHDA\C4G0M2(C4L0R2)\R1S101\Section4
1	144897	C:\Users\WhelanImageRig\Desktop\A13_SlideScanner Viral ROI\CHR2-6OHDA\C4G0M2(C4L0R2)\R1S101\Section5
2	1315659	C:\Users\WhelanImageRig\Desktop\A13_SlideScanner Viral ROI\CHR2-6OHDA\C4G0M2(C4L0R2)\R1S101\Section5
1	187464	C:\Users\WhelanImageRig\Desktop\A13_SlideScanner Viral ROI\CHR2-6OHDA\C4G0M2(C4L0R2)\R1S101\Section6
2	1524029	C:\Users\WhelanImageRig\Desktop\A13_SlideScanner Viral ROI\CHR2-6OHDA\C4G0M2(C4L0R2)\R1S101\Section6
1	105536	C:\Users\WhelanImageRig\Desktop\A13_SlideScanner Viral ROI\CHR2-6OHDA\C4G0M2(C4L0R2)\R1S102\Section1
2	1603961	C:\Users\WhelanImageRig\Desktop\A13_SlideScanner Viral ROI\CHR2-6OHDA\C4G0M2(C4L0R2)\R1S102\Section1
1	138398	C:\Users\WhelanImageRig\Desktop\A13_SlideScanner Viral ROI\CHR2-6OHDA\C4G0M2(C4L0R2)\R1S102\Section10
2	8271	C:\Users\WhelanImageRig\Desktop\A13_SlideScanner Viral ROI\CHR2-6OHDA\C4G0M2(C4L0R2)\R1S102\Section10
3	3665	C:\Users\WhelanImageRig\Desktop\A13_SlideScanner Viral ROI\CHR2-6OHDA\C4G0M2(C4L0R2)\R1S102\Section10
4	1422870	C:\Users\WhelanImageRig\Desktop\A13_SlideScanner Viral ROI\CHR2-6OHDA\C4G0M2(C4L0R2)\R1S102\Section10
1	185746	C:\Users\WhelanImageRig\Desktop\A13_SlideScanner Viral ROI\CHR2-6OHDA\C4G0M2(C4L0R2)\R1S102\Section11
2	1545323	C:\Users\WhelanImageRig\Desktop\A13_SlideScanner Viral ROI\CHR2-6OHDA\C4G0M2(C4L0R2)\R1S102\Section11
1	105842	C:\Users\WhelanImageRig\Desktop\A13_SlideScanner Viral ROI\CHR2-6OHDA\C4G0M2(C4L0R2)\R1S102\Section12
2	46349	C:\Users\WhelanImageRig\Desktop\A13_SlideScanner Viral ROI\CHR2-6OHDA\C4G0M2(C4L0R2)\R1S102\Section12
3	1549544	C:\Users\WhelanImageRig\Desktop\A13_SlideScanner Viral ROI\CHR2-6OHDA\C4G0M2(C4L0R2)\R1S102\Section12
1	109397	C:\Users\WhelanImageRig\Desktop\A13_SlideScanner Viral ROI\CHR2-6OHDA\C4G0M2(C4L0R2)\R1S102\Section2
2	7403	C:\Users\WhelanImageRig\Desktop\A13_SlideScanner Viral ROI\CHR2-6OHDA\C4G0M2(C4L0R2)\R1S102\Section2
3	1662661	C:\Users\WhelanImageRig\Desktop\A13_SlideScanner Viral ROI\CHR2-6OHDA\C4G0M2(C4L0R2)\R1S102\Section2
1	97132	C:\Users\WhelanImageRig\Desktop\A13_SlideScanner Viral ROI\CHR2-6OHDA\C4G0M2(C4L0R2)\R1S102\Section3
2	7274	C:\Users\WhelanImageRig\Desktop\A13_SlideScanner Viral ROI\CHR2-6OHDA\C4G0M2(C4L0R2)\R1S102\Section3
3	1553644	C:\Users\WhelanImageRig\Desktop\A13_SlideScanner Viral ROI\CHR2-6OHDA\C4G0M2(C4L0R2)\R1S102\Section3
1	154435	C:\Users\WhelanImageRig\Desktop\A13_SlideScanner Viral ROI\CHR2-6OHDA\C4G0M2(C4L0R2)\R1S102\Section4
2	1562712	C:\Users\WhelanImageRig\Desktop\A13_SlideScanner Viral ROI\CHR2-6OHDA\C4G0M2(C4L0R2)\R1S102\Section4
1	117519	C:\Users\WhelanImageRig\Desktop\A13_SlideScanner Viral ROI\CHR2-6OHDA\C4G0M2(C4L0R2)\R1S102\Section5
2	1541	C:\Users\WhelanImageRig\Desktop\A13_SlideScanner Viral ROI\CHR2-6OHDA\C4G0M2(C4L0R2)\R1S102\Section5
3	1487363	C:\Users\WhelanImageRig\Desktop\A13_SlideScanner Viral ROI\CHR2-6OHDA\C4G0M2(C4L0R2)\R1S102\Section5
1	99502	C:\Users\WhelanImageRig\Desktop\A13_SlideScanner Viral ROI\CHR2-6OHDA\C4G0M2(C4L0R2)\R1S102\Section6
2	3729	C:\Users\WhelanImageRig\Desktop\A13_SlideScanner Viral ROI\CHR2-6OHDA\C4G0M2(C4L0R2)\R1S102\Section6
3	1600792	C:\Users\WhelanImageRig\Desktop\A13_SlideScanner Viral ROI\CHR2-6OHDA\C4G0M2(C4L0R2)\R1S102\Section6
1	136686	C:\Users\WhelanImageRig\Desktop\A13_SlideScanner Viral ROI\CHR2-6OHDA\C4G0M2(C4L0R2)\R1S102\Section7
2	1578091	C:\Users\WhelanImageRig\Desktop\A13_SlideScanner Viral ROI\CHR2-6OHDA\C4G0M2(C4L0R2)\R1S102\Section7
1	100435	C:\Users\WhelanImageRig\Desktop\A13_SlideScanner Viral ROI\CHR2-6OHDA\C4G0M2(C4L0R2)\R1S102\Section8
2	4111	C:\Users\WhelanImageRig\Desktop\A13_SlideScanner Viral ROI\CHR2-6OHDA\C4G0M2(C4L0R2)\R1S102\Section8
3	13371	C:\Users\WhelanImageRig\Desktop\A13_SlideScanner Viral ROI\CHR2-6OHDA\C4G0M2(C4L0R2)\R1S102\Section8
4	1548290	C:\Users\WhelanImageRig\Desktop\A13_SlideScanner Viral ROI\CHR2-6OHDA\C4G0M2(C4L0R2)\R1S102\Section8
1	106950	C:\Users\WhelanImageRig\Desktop\A13_SlideScanner Viral ROI\CHR2-6OHDA\C4G0M2(C4L0R2)\R1S102\Section9
2	1540376	C:\Users\WhelanImageRig\Desktop\A13_SlideScanner Viral ROI\CHR2-6OHDA\C4G0M2(C4L0R2)\R1S102\Section9
1	144936	C:\Users\WhelanImageRig\Desktop\A13_SlideScanner Viral ROI\CHR2-6OHDA\C4G0M2(C4L0R2)\R1S103\Section1
2	1717578	C:\Users\WhelanImageRig\Desktop\A13_SlideScanner Viral ROI\CHR2-6OHDA\C4G0M2(C4L0R2)\R1S103\Section1
1	95802	C:\Users\WhelanImageRig\Desktop\A13_SlideScanner Viral ROI\CHR2-6OHDA\C4G0M2(C4L0R2)\R1S103\Section2
2	1737448	C:\Users\WhelanImageRig\Desktop\A13_SlideScanner Viral ROI\CHR2-6OHDA\C4G0M2(C4L0R2)\R1S103\Section2
1	145625	C:\Users\WhelanImageRig\Desktop\A13_SlideScanner Viral ROI\CHR2-6OHDA\C4G0M2(C4L0R2)\R3S101\Section1
2	1725799	C:\Users\WhelanImageRig\Desktop\A13_SlideScanner Viral ROI\CHR2-6OHDA\C4G0M2(C4L0R2)\R3S101\Section1
1	142172	C:\Users\WhelanImageRig\Desktop\A13_SlideScanner Viral ROI\CHR2-6OHDA\C4G0M2(C4L0R2)\R3S101\Section10
2	1556763	C:\Users\WhelanImageRig\Desktop\A13_SlideScanner Viral ROI\CHR2-6OHDA\C4G0M2(C4L0R2)\R3S101\Section10
1	187287	C:\Users\WhelanImageRig\Desktop\A13_SlideScanner Viral ROI\CHR2-6OHDA\C4G0M2(C4L0R2)\R3S101\Section11
2	1551160	C:\Users\WhelanImageRig\Desktop\A13_SlideScanner Viral ROI\CHR2-6OHDA\C4G0M2(C4L0R2)\R3S101\Section11
1	184193	C:\Users\WhelanImageRig\Desktop\A13_SlideScanner Viral ROI\CHR2-6OHDA\C4G0M2(C4L0R2)\R3S101\Section12
2	1668476	C:\Users\WhelanImageRig\Desktop\A13_SlideScanner Viral ROI\CHR2-6OHDA\C4G0M2(C4L0R2)\R3S101\Section12
1	136123	C:\Users\WhelanImageRig\Desktop\A13_SlideScanner Viral ROI\CHR2-6OHDA\C4G0M2(C4L0R2)\R3S101\Section2
2	1761912	C:\Users\WhelanImageRig\Desktop\A13_SlideScanner Viral ROI\CHR2-6OHDA\C4G0M2(C4L0R2)\R3S101\Section2
1	116125	C:\Users\WhelanImageRig\Desktop\A13_SlideScanner Viral ROI\CHR2-6OHDA\C4G0M2(C4L0R2)\R3S101\Section3
2	5141	C:\Users\WhelanImageRig\Desktop\A13_SlideScanner Viral ROI\CHR2-6OHDA\C4G0M2(C4L0R2)\R3S101\Section3
3	6255	C:\Users\WhelanImageRig\Desktop\A13_SlideScanner Viral ROI\CHR2-6OHDA\C4G0M2(C4L0R2)\R3S101\Section3
4	20695	C:\Users\WhelanImageRig\Desktop\A13_SlideScanner Viral ROI\CHR2-6OHDA\C4G0M2(C4L0R2)\R3S101\Section3
5	1554570	C:\Users\WhelanImageRig\Desktop\A13_SlideScanner Viral ROI\CHR2-6OHDA\C4G0M2(C4L0R2)\R3S101\Section3
1	143090	C:\Users\WhelanImageRig\Desktop\A13_SlideScanner Viral ROI\CHR2-6OHDA\C4G0M2(C4L0R2)\R3S101\Section4
2	1617520	C:\Users\WhelanImageRig\Desktop\A13_SlideScanner Viral ROI\CHR2-6OHDA\C4G0M2(C4L0R2)\R3S101\Section4
1	140481	C:\Users\WhelanImageRig\Desktop\A13_SlideScanner Viral ROI\CHR2-6OHDA\C4G0M2(C4L0R2)\R3S101\Section5
2	1646386	C:\Users\WhelanImageRig\Desktop\A13_SlideScanner Viral ROI\CHR2-6OHDA\C4G0M2(C4L0R2)\R3S101\Section5
1	72396	C:\Users\WhelanImageRig\Desktop\A13_SlideScanner Viral ROI\CHR2-6OHDA\C4G0M2(C4L0R2)\R3S101\Section6
2	41414	C:\Users\WhelanImageRig\Desktop\A13_SlideScanner Viral ROI\CHR2-6OHDA\C4G0M2(C4L0R2)\R3S101\Section6
3	1521452	C:\Users\WhelanImageRig\Desktop\A13_SlideScanner Viral ROI\CHR2-6OHDA\C4G0M2(C4L0R2)\R3S101\Section6
1	183338	C:\Users\WhelanImageRig\Desktop\A13_SlideScanner Viral ROI\CHR2-6OHDA\C4G0M2(C4L0R2)\R3S101\Section7
2	1644471	C:\Users\WhelanImageRig\Desktop\A13_SlideScanner Viral ROI\CHR2-6OHDA\C4G0M2(C4L0R2)\R3S101\Section7
1	213293	C:\Users\WhelanImageRig\Desktop\A13_SlideScanner Viral ROI\CHR2-6OHDA\C4G0M2(C4L0R2)\R3S101\Section8
2	7460	C:\Users\WhelanImageRig\Desktop\A13_SlideScanner Viral ROI\CHR2-6OHDA\C4G0M2(C4L0R2)\R3S101\Section8
3	1602665	C:\Users\WhelanImageRig\Desktop\A13_SlideScanner Viral ROI\CHR2-6OHDA\C4G0M2(C4L0R2)\R3S101\Section8
1	92979	C:\Users\WhelanImageRig\Desktop\A13_SlideScanner Viral ROI\CHR2-6OHDA\C4G0M2(C4L0R2)\R3S101\Section9
2	33980	C:\Users\WhelanImageRig\Desktop\A13_SlideScanner Viral ROI\CHR2-6OHDA\C4G0M2(C4L0R2)\R3S101\Section9
3	1526819	C:\Users\WhelanImageRig\Desktop\A13_SlideScanner Viral ROI\CHR2-6OHDA\C4G0M2(C4L0R2)\R3S101\Section9
1	76075	C:\Users\WhelanImageRig\Desktop\A13_SlideScanner Viral ROI\CHR2-6OHDA\C4G0M2(C4L0R2)\R3S201\Section1
2	5990	C:\Users\WhelanImageRig\Desktop\A13_SlideScanner Viral ROI\CHR2-6OHDA\C4G0M2(C4L0R2)\R3S201\Section1
3	42588	C:\Users\WhelanImageRig\Desktop\A13_SlideScanner Viral ROI\CHR2-6OHDA\C4G0M2(C4L0R2)\R3S201\Section1
4	1590052	C:\Users\WhelanImageRig\Desktop\A13_SlideScanner Viral ROI\CHR2-6OHDA\C4G0M2(C4L0R2)\R3S201\Section1
1	181706	C:\Users\WhelanImageRig\Desktop\A13_SlideScanner Viral ROI\CHR2-6OHDA\C4G0M2(C4L0R2)\R3S201\Section2
2	2137164	C:\Users\WhelanImageRig\Desktop\A13_SlideScanner Viral ROI\CHR2-6OHDA\C4G0M2(C4L0R2)\R3S201\Section2
Section	Folder	Area of Viral Spread	Area total	Section	Area Percent	AP?
C4L0R2-A13-R2S101.vsi - C4L0R2-A13-R2S101.vsi #16.tif	R2S101	139317	1168351	1	0.119242	-0.77
C4L0R2-A13-R2S101.vsi - C4L0R2-A13-R2S101.vsi #22.tif	R2S101	165991	1401936	2	0.118401	-1.17
C4L0R2-A13-R2S101.vsi - C4L0R2-A13-R2S101.vsi #28.tif	R2S101	142029	1404718	3	0.101109	-0.57
C4L0R2-A13-R2S101.vsi - C4L0R2-A13-R2S101.vsi #34.tif	R2S101	92069	1423826	4	0.0646631	ripped, near front?
C4L0R2-A13-R2S101.vsi - C4L0R2-A13-R2S101.vsi #46.tif	R2S101	144897	1315659	5	0.110133	-0.27
C4L0R2-A13-R2S101.vsi - C4L0R2-A13-R2S101.vsi #52.tif	R2S101	187464	1524029	6	0.123006	ripped, somewhere near middle
C4L0R2-A13-IHC-a_R1S102.vsi - C4L0R2-A13-IHC-a_R1S102.vsi #16.tif	R1S102	105536	1603961	1	0.0657971	-1.67
C4L0R2-A13-IHC-a_R1S102.vsi - C4L0R2-A13-IHC-a_R1S102.vsi #70.tif	R1S102	150334	1422870	10	0.105655	-0.27
C4L0R2-A13-IHC-a_R1S102.vsi - C4L0R2-A13-IHC-a_R1S102.vsi #76.tif	R1S102	185746	1545323	11	0.120199	-0.47
C4L0R2-A13-IHC-a_R1S102.vsi - C4L0R2-A13-IHC-a_R1S102.vsi #82.tif	R1S102	152191	1549544	12	0.0982166	-0.37
C4L0R2-A13-IHC-a_R1S102.vsi - C4L0R2-A13-IHC-a_R1S102.vsi #22.tif	R1S102	116800	1662661	2	0.0702488	-1.87
C4L0R2-A13-IHC-a_R1S102.vsi - C4L0R2-A13-IHC-a_R1S102.vsi #28.tif	R1S102	104406	1553644	3	0.0672007	-1.47
C4L0R2-A13-IHC-a_R1S102.vsi - C4L0R2-A13-IHC-a_R1S102.vsi #34.tif	R1S102	154435	1562712	4	0.098825	-1.07
C4L0R2-A13-IHC-a_R1S102.vsi - C4L0R2-A13-IHC-a_R1S102.vsi #40.tif	R1S102	119060	1487363	5	0.0800477	-1.27
C4L0R2-A13-IHC-a_R1S102.vsi - C4L0R2-A13-IHC-a_R1S102.vsi #46.tif	R1S102	103231	1600792	6	0.0644875	-1.57
C4L0R2-A13-IHC-a_R1S102.vsi - C4L0R2-A13-IHC-a_R1S102.vsi #52.tif	R1S102	136686	1578091	7	0.0866148	-0.97
C4L0R2-A13-IHC-a_R1S102.vsi - C4L0R2-A13-IHC-a_R1S102.vsi #58.tif	R1S102	117917	1548290	8	0.0761595	-0.87
C4L0R2-A13-IHC-a_R1S102.vsi - C4L0R2-A13-IHC-a_R1S102.vsi #64.tif	R1S102	106950	1540376	9	0.0694311	-0.67
C4L0R2-A13-IHC-a_R1S203.vsi - C4L0R2-A13-IHC-a_R1S203.vsi #34.tif	R1S203	144936	1717578	1	0.0843839	-2.07
C4L0R2-A13-IHC-a_R1S203.vsi - C4L0R2-A13-IHC-a_R1S203.vsi #40.tif	R1S203	95802	1737448	2	0.0551395	-2.27
C4L0R2-A13-R3S101.vsi - C4L0R2-A13-R3S101.vsi #16.tif	R3S101	145625	1725799	1	0.0843812	-1.97
C4L0R2-A13-R3S101.vsi - C4L0R2-A13-R3S101.vsi #70.tif	R3S101	142172	1556763	10	0.0913254	-0.67
C4L0R2-A13-R3S101.vsi - C4L0R2-A13-R3S101.vsi #76.tif	R3S101	187287	1551160	11	0.12074	-1.27
C4L0R2-A13-R3S101.vsi - C4L0R2-A13-R3S101.vsi #82.tif	R3S101	184193	1668476	12	0.110396	-1.67
C4L0R2-A13-R3S101.vsi - C4L0R2-A13-R3S101.vsi #22.tif	R3S101	136123	1761912	2	0.0772587	-2.17
C4L0R2-A13-R3S101.vsi - C4L0R2-A13-R3S101.vsi #28.tif	R3S101	148216	1554570	3	0.0953421	-0.77
C4L0R2-A13-R3S101.vsi - C4L0R2-A13-R3S101.vsi #34.tif	R3S101	143090	1617520	4	0.0884626	-0.97-1.17
C4L0R2-A13-R3S101.vsi - C4L0R2-A13-R3S101.vsi #40.tif	R3S101	140481	1646386	5	0.0853269	-1.37
C4L0R2-A13-R3S101.vsi - C4L0R2-A13-R3S101.vsi #46.tif	R3S101	113810	1521452	6	0.0748035	-0.47
C4L0R2-A13-R3S101.vsi - C4L0R2-A13-R3S101.vsi #52.tif	R3S101	183338	1644471	7	0.111488	-1.77
C4L0R2-A13-R3S101.vsi - C4L0R2-A13-R3S101.vsi #58.tif	R3S101	220753	1602665	8	0.137741	-0.87
C4L0R2-A13-R3S101.vsi - C4L0R2-A13-R3S101.vsi #64.tif	R3S101	126959	1526819	9	0.0831526	-0.37
C4L0R2-A13-R3S201.vsi - C4L0R2-A13-R3S201.vsi #22.tif	R3S201	124653	1590052	1	0.0783955	-1.47-1.57
C4L0R2-A13-R3S201.vsi - C4L0R2-A13-R3S201.vsi #34.tif	R3S201	181706	2137164	2	0.085022	-2.37

## Sheet: C3G2_0M2_Saline_CHR2
ROI Number per Section	Area	FolderPath
1	87980	C:\Users\WhelanImageRig\Desktop\A13_SlideScanner Viral ROI\CHR2-Saline\C3G2_0M2\R1S101\Section1
2	1572278	C:\Users\WhelanImageRig\Desktop\A13_SlideScanner Viral ROI\CHR2-Saline\C3G2_0M2\R1S101\Section1
1	71320	C:\Users\WhelanImageRig\Desktop\A13_SlideScanner Viral ROI\CHR2-Saline\C3G2_0M2\R1S101\Section10
2	1674220	C:\Users\WhelanImageRig\Desktop\A13_SlideScanner Viral ROI\CHR2-Saline\C3G2_0M2\R1S101\Section10
1	78600	C:\Users\WhelanImageRig\Desktop\A13_SlideScanner Viral ROI\CHR2-Saline\C3G2_0M2\R1S101\Section11
2	1449284	C:\Users\WhelanImageRig\Desktop\A13_SlideScanner Viral ROI\CHR2-Saline\C3G2_0M2\R1S101\Section11
1	112019	C:\Users\WhelanImageRig\Desktop\A13_SlideScanner Viral ROI\CHR2-Saline\C3G2_0M2\R1S101\Section12
2	1091993	C:\Users\WhelanImageRig\Desktop\A13_SlideScanner Viral ROI\CHR2-Saline\C3G2_0M2\R1S101\Section12
1	170802	C:\Users\WhelanImageRig\Desktop\A13_SlideScanner Viral ROI\CHR2-Saline\C3G2_0M2\R1S101\Section2
2	1509324	C:\Users\WhelanImageRig\Desktop\A13_SlideScanner Viral ROI\CHR2-Saline\C3G2_0M2\R1S101\Section2
1	101713	C:\Users\WhelanImageRig\Desktop\A13_SlideScanner Viral ROI\CHR2-Saline\C3G2_0M2\R1S101\Section3
2	9334	C:\Users\WhelanImageRig\Desktop\A13_SlideScanner Viral ROI\CHR2-Saline\C3G2_0M2\R1S101\Section3
3	1615768	C:\Users\WhelanImageRig\Desktop\A13_SlideScanner Viral ROI\CHR2-Saline\C3G2_0M2\R1S101\Section3
1	213129	C:\Users\WhelanImageRig\Desktop\A13_SlideScanner Viral ROI\CHR2-Saline\C3G2_0M2\R1S101\Section4
2	664208	C:\Users\WhelanImageRig\Desktop\A13_SlideScanner Viral ROI\CHR2-Saline\C3G2_0M2\R1S101\Section4
1	88350	C:\Users\WhelanImageRig\Desktop\A13_SlideScanner Viral ROI\CHR2-Saline\C3G2_0M2\R1S101\Section5
1	1679932	C:\Users\WhelanImageRig\Desktop\A13_SlideScanner Viral ROI\CHR2-Saline\C3G2_0M2\R1S101\Section5
1	75680	C:\Users\WhelanImageRig\Desktop\A13_SlideScanner Viral ROI\CHR2-Saline\C3G2_0M2\R1S101\Section6
2	13015	C:\Users\WhelanImageRig\Desktop\A13_SlideScanner Viral ROI\CHR2-Saline\C3G2_0M2\R1S101\Section6
3	1657319	C:\Users\WhelanImageRig\Desktop\A13_SlideScanner Viral ROI\CHR2-Saline\C3G2_0M2\R1S101\Section6
1	183518	C:\Users\WhelanImageRig\Desktop\A13_SlideScanner Viral ROI\CHR2-Saline\C3G2_0M2\R1S101\Section7
2	1129360	C:\Users\WhelanImageRig\Desktop\A13_SlideScanner Viral ROI\CHR2-Saline\C3G2_0M2\R1S101\Section7
1	118458	C:\Users\WhelanImageRig\Desktop\A13_SlideScanner Viral ROI\CHR2-Saline\C3G2_0M2\R1S101\Section8
2	1490536	C:\Users\WhelanImageRig\Desktop\A13_SlideScanner Viral ROI\CHR2-Saline\C3G2_0M2\R1S101\Section8
1	85765	C:\Users\WhelanImageRig\Desktop\A13_SlideScanner Viral ROI\CHR2-Saline\C3G2_0M2\R1S101\Section9
2	2511	C:\Users\WhelanImageRig\Desktop\A13_SlideScanner Viral ROI\CHR2-Saline\C3G2_0M2\R1S101\Section9
3	1562506	C:\Users\WhelanImageRig\Desktop\A13_SlideScanner Viral ROI\CHR2-Saline\C3G2_0M2\R1S101\Section9
1	88921	C:\Users\WhelanImageRig\Desktop\A13_SlideScanner Viral ROI\CHR2-Saline\C3G2_0M2\R2S101\Section1
2	1176156	C:\Users\WhelanImageRig\Desktop\A13_SlideScanner Viral ROI\CHR2-Saline\C3G2_0M2\R2S101\Section1
1	65632	C:\Users\WhelanImageRig\Desktop\A13_SlideScanner Viral ROI\CHR2-Saline\C3G2_0M2\R2S101\Section2
2	1653374	C:\Users\WhelanImageRig\Desktop\A13_SlideScanner Viral ROI\CHR2-Saline\C3G2_0M2\R2S101\Section2
1	85875	C:\Users\WhelanImageRig\Desktop\A13_SlideScanner Viral ROI\CHR2-Saline\C3G2_0M2\R2S101\Section3
2	1771710	C:\Users\WhelanImageRig\Desktop\A13_SlideScanner Viral ROI\CHR2-Saline\C3G2_0M2\R2S101\Section3
1	62833	C:\Users\WhelanImageRig\Desktop\A13_SlideScanner Viral ROI\CHR2-Saline\C3G2_0M2\R2S101\Section4
2	1661587	C:\Users\WhelanImageRig\Desktop\A13_SlideScanner Viral ROI\CHR2-Saline\C3G2_0M2\R2S101\Section4
1	72702	C:\Users\WhelanImageRig\Desktop\A13_SlideScanner Viral ROI\CHR2-Saline\C3G2_0M2\R2S101\Section5
2	8400	C:\Users\WhelanImageRig\Desktop\A13_SlideScanner Viral ROI\CHR2-Saline\C3G2_0M2\R2S101\Section5
3	1502722	C:\Users\WhelanImageRig\Desktop\A13_SlideScanner Viral ROI\CHR2-Saline\C3G2_0M2\R2S101\Section5
1	12393	C:\Users\WhelanImageRig\Desktop\A13_SlideScanner Viral ROI\CHR2-Saline\C3G2_0M2\R2S101\Section6
2	1004445	C:\Users\WhelanImageRig\Desktop\A13_SlideScanner Viral ROI\CHR2-Saline\C3G2_0M2\R2S101\Section6
1	37337	C:\Users\WhelanImageRig\Desktop\A13_SlideScanner Viral ROI\CHR2-Saline\C3G2_0M2\R3S101\Section1
2	16814	C:\Users\WhelanImageRig\Desktop\A13_SlideScanner Viral ROI\CHR2-Saline\C3G2_0M2\R3S101\Section1
3	10931	C:\Users\WhelanImageRig\Desktop\A13_SlideScanner Viral ROI\CHR2-Saline\C3G2_0M2\R3S101\Section1
4	1498601	C:\Users\WhelanImageRig\Desktop\A13_SlideScanner Viral ROI\CHR2-Saline\C3G2_0M2\R3S101\Section1
1	76965	C:\Users\WhelanImageRig\Desktop\A13_SlideScanner Viral ROI\CHR2-Saline\C3G2_0M2\R3S101\Section10
2	5897	C:\Users\WhelanImageRig\Desktop\A13_SlideScanner Viral ROI\CHR2-Saline\C3G2_0M2\R3S101\Section10
3	7246	C:\Users\WhelanImageRig\Desktop\A13_SlideScanner Viral ROI\CHR2-Saline\C3G2_0M2\R3S101\Section10
4	1554806	C:\Users\WhelanImageRig\Desktop\A13_SlideScanner Viral ROI\CHR2-Saline\C3G2_0M2\R3S101\Section10
1	143858	C:\Users\WhelanImageRig\Desktop\A13_SlideScanner Viral ROI\CHR2-Saline\C3G2_0M2\R3S101\Section11
2	2359	C:\Users\WhelanImageRig\Desktop\A13_SlideScanner Viral ROI\CHR2-Saline\C3G2_0M2\R3S101\Section11
3	1461061	C:\Users\WhelanImageRig\Desktop\A13_SlideScanner Viral ROI\CHR2-Saline\C3G2_0M2\R3S101\Section11
1	58188	C:\Users\WhelanImageRig\Desktop\A13_SlideScanner Viral ROI\CHR2-Saline\C3G2_0M2\R3S101\Section12
2	5605	C:\Users\WhelanImageRig\Desktop\A13_SlideScanner Viral ROI\CHR2-Saline\C3G2_0M2\R3S101\Section12
3	1497787	C:\Users\WhelanImageRig\Desktop\A13_SlideScanner Viral ROI\CHR2-Saline\C3G2_0M2\R3S101\Section12
1	81326	C:\Users\WhelanImageRig\Desktop\A13_SlideScanner Viral ROI\CHR2-Saline\C3G2_0M2\R3S101\Section13
2	3612	C:\Users\WhelanImageRig\Desktop\A13_SlideScanner Viral ROI\CHR2-Saline\C3G2_0M2\R3S101\Section13
3	6046	C:\Users\WhelanImageRig\Desktop\A13_SlideScanner Viral ROI\CHR2-Saline\C3G2_0M2\R3S101\Section13
4	1509331	C:\Users\WhelanImageRig\Desktop\A13_SlideScanner Viral ROI\CHR2-Saline\C3G2_0M2\R3S101\Section13
1	54877	C:\Users\WhelanImageRig\Desktop\A13_SlideScanner Viral ROI\CHR2-Saline\C3G2_0M2\R3S101\Section14
2	17073	C:\Users\WhelanImageRig\Desktop\A13_SlideScanner Viral ROI\CHR2-Saline\C3G2_0M2\R3S101\Section14
3	1951	C:\Users\WhelanImageRig\Desktop\A13_SlideScanner Viral ROI\CHR2-Saline\C3G2_0M2\R3S101\Section14
4	2192	C:\Users\WhelanImageRig\Desktop\A13_SlideScanner Viral ROI\CHR2-Saline\C3G2_0M2\R3S101\Section14
5	4638	C:\Users\WhelanImageRig\Desktop\A13_SlideScanner Viral ROI\CHR2-Saline\C3G2_0M2\R3S101\Section14
6	1242973	C:\Users\WhelanImageRig\Desktop\A13_SlideScanner Viral ROI\CHR2-Saline\C3G2_0M2\R3S101\Section14
1	75833	C:\Users\WhelanImageRig\Desktop\A13_SlideScanner Viral ROI\CHR2-Saline\C3G2_0M2\R3S101\Section2
2	1395406	C:\Users\WhelanImageRig\Desktop\A13_SlideScanner Viral ROI\CHR2-Saline\C3G2_0M2\R3S101\Section2
1	65617	C:\Users\WhelanImageRig\Desktop\A13_SlideScanner Viral ROI\CHR2-Saline\C3G2_0M2\R3S101\Section3
2	1495170	C:\Users\WhelanImageRig\Desktop\A13_SlideScanner Viral ROI\CHR2-Saline\C3G2_0M2\R3S101\Section3
1	61148	C:\Users\WhelanImageRig\Desktop\A13_SlideScanner Viral ROI\CHR2-Saline\C3G2_0M2\R3S101\Section4
2	5126	C:\Users\WhelanImageRig\Desktop\A13_SlideScanner Viral ROI\CHR2-Saline\C3G2_0M2\R3S101\Section4
3	1550	C:\Users\WhelanImageRig\Desktop\A13_SlideScanner Viral ROI\CHR2-Saline\C3G2_0M2\R3S101\Section4
4	1528107	C:\Users\WhelanImageRig\Desktop\A13_SlideScanner Viral ROI\CHR2-Saline\C3G2_0M2\R3S101\Section4
1	73802	C:\Users\WhelanImageRig\Desktop\A13_SlideScanner Viral ROI\CHR2-Saline\C3G2_0M2\R3S101\Section5
2	8600	C:\Users\WhelanImageRig\Desktop\A13_SlideScanner Viral ROI\CHR2-Saline\C3G2_0M2\R3S101\Section5
3	4659	C:\Users\WhelanImageRig\Desktop\A13_SlideScanner Viral ROI\CHR2-Saline\C3G2_0M2\R3S101\Section5
4	1089	C:\Users\WhelanImageRig\Desktop\A13_SlideScanner Viral ROI\CHR2-Saline\C3G2_0M2\R3S101\Section5
5	1498867	C:\Users\WhelanImageRig\Desktop\A13_SlideScanner Viral ROI\CHR2-Saline\C3G2_0M2\R3S101\Section5
1	86156	C:\Users\WhelanImageRig\Desktop\A13_SlideScanner Viral ROI\CHR2-Saline\C3G2_0M2\R3S101\Section6
2	13814	C:\Users\WhelanImageRig\Desktop\A13_SlideScanner Viral ROI\CHR2-Saline\C3G2_0M2\R3S101\Section6
3	1511870	C:\Users\WhelanImageRig\Desktop\A13_SlideScanner Viral ROI\CHR2-Saline\C3G2_0M2\R3S101\Section6
1	63581	C:\Users\WhelanImageRig\Desktop\A13_SlideScanner Viral ROI\CHR2-Saline\C3G2_0M2\R3S101\Section7
2	3032	C:\Users\WhelanImageRig\Desktop\A13_SlideScanner Viral ROI\CHR2-Saline\C3G2_0M2\R3S101\Section7
3	7256	C:\Users\WhelanImageRig\Desktop\A13_SlideScanner Viral ROI\CHR2-Saline\C3G2_0M2\R3S101\Section7
4	1511309	C:\Users\WhelanImageRig\Desktop\A13_SlideScanner Viral ROI\CHR2-Saline\C3G2_0M2\R3S101\Section7
1	132874	C:\Users\WhelanImageRig\Desktop\A13_SlideScanner Viral ROI\CHR2-Saline\C3G2_0M2\R3S101\Section8
2	1416594	C:\Users\WhelanImageRig\Desktop\A13_SlideScanner Viral ROI\CHR2-Saline\C3G2_0M2\R3S101\Section8
1	88580	C:\Users\WhelanImageRig\Desktop\A13_SlideScanner Viral ROI\CHR2-Saline\C3G2_0M2\R3S101\Section9
2	1447837	C:\Users\WhelanImageRig\Desktop\A13_SlideScanner Viral ROI\CHR2-Saline\C3G2_0M2\R3S101\Section9
Section	Folder	Area of Viral Spread	Area Total	Section	Area Percent	AP?
C3G2_0M2_A13_R1S101.vsi - C3G2_0M2_A13_R1S101.vsi #16.tif	R1S101	87980	1572278	1	0.055957	-0.97
C3G2_0M2_A13_R1S101.vsi - C3G2_0M2_A13_R1S101.vsi #70.tif	R1S101	71320	1674220	10	0.0425989	-0.77
C3G2_0M2_A13_R1S101.vsi - C3G2_0M2_A13_R1S101.vsi #76.tif	R1S101	78600	1449284	11	0.0542337	-1.97
C3G2_0M2_A13_R1S101.vsi - C3G2_0M2_A13_R1S101.vsi #82.tif	R1S101	112019	1091993	12	0.102582	-2.17
C3G2_0M2_A13_R1S101.vsi - C3G2_0M2_A13_R1S101.vsi #22.tif	R1S101	170802	1509324	2	0.113165	-2.07
C3G2_0M2_A13_R1S101.vsi - C3G2_0M2_A13_R1S101.vsi #28.tif	R1S101	111047	1615768	3	0.0687271	-1.37
C3G2_0M2_A13_R1S101.vsi - C3G2_0M2_A13_R1S101.vsi #34.tif	R1S101	213129	664208	4	0.320877	ripped
C3G2_0M2_A13_R1S101.vsi - C3G2_0M2_A13_R1S101.vsi #40.tif	R1S101	88350	1679932	5	0.0525914	-0.87
C3G2_0M2_A13_R1S101.vsi - C3G2_0M2_A13_R1S101.vsi #46.tif	R1S101	88695	1657319	6	0.0535172	-1.87
C3G2_0M2_A13_R1S101.vsi - C3G2_0M2_A13_R1S101.vsi #52.tif	R1S101	183518	1129360	7	0.162497	-2.17
C3G2_0M2_A13_R1S101.vsi - C3G2_0M2_A13_R1S101.vsi #58.tif	R1S101	118458	1490536	8	0.0794734	-0.57
C3G2_0M2_A13_R1S101.vsi - C3G2_0M2_A13_R1S101.vsi #64.tif	R1S101	88276	1562506	9	0.0564964	-1.07-1.17
C3G2_0M2-A13_R2S101.vsi - C3G2_0M2-A13_R2S101.vsi #16.tif	R2S101	88921	1176156	1	0.0756031	-1.17
C3G2_0M2-A13_R2S101.vsi - C3G2_0M2-A13_R2S101.vsi #22.tif	R2S101	65632	1653374	2	0.0396958	-0.87
C3G2_0M2-A13_R2S101.vsi - C3G2_0M2-A13_R2S101.vsi #28.tif	R2S101	85875	1771710	3	0.0484701	-0.97
C3G2_0M2-A13_R2S101.vsi - C3G2_0M2-A13_R2S101.vsi #34.tif	R2S101	62833	1661587	4	0.0378151	-0.77
C3G2_0M2-A13_R2S101.vsi - C3G2_0M2-A13_R2S101.vsi #40.tif	R2S101	81102	1502722	5	0.0539701	-1.57
C3G2_0M2-A13_R2S101.vsi - C3G2_0M2-A13_R2S101.vsi #46.tif	R2S101	12393	1004445	6	0.0123382	ripped
C3G2_0M2-A13-R3S101.vsi - C3G2_0M2-A13-R3S101.vsi #16.tif	R3S101	65082	1498601	1	0.0434285	-1.27
C3G2_0M2-A13-R3S101.vsi - C3G2_0M2-A13-R3S101.vsi #70.tif	R3S101	90108	1554806	10	0.0579545	-2.07
C3G2_0M2-A13-R3S101.vsi - C3G2_0M2-A13-R3S101.vsi #76.tif	R3S101	146217	1461061	11	0.100076	-0.37
C3G2_0M2-A13-R3S101.vsi - C3G2_0M2-A13-R3S101.vsi #82.tif	R3S101	63793	1497787	12	0.0425915	-0.77
C3G2_0M2-A13-R3S101.vsi - C3G2_0M2-A13-R3S101.vsi #88.tif	R3S101	90984	1509331	13	0.060281	-1.07
C3G2_0M2-A13-R3S101.vsi - C3G2_0M2-A13-R3S101.vsi #94.tif	R3S101	80731	1242973	14	0.0649499
C3G2_0M2-A13-R3S101.vsi - C3G2_0M2-A13-R3S101.vsi #22.tif	R3S101	75833	1395406	2	0.0543448	-0.27
C3G2_0M2-A13-R3S101.vsi - C3G2_0M2-A13-R3S101.vsi #28.tif	R3S101	65617	1495170	3	0.043886	-0.67
C3G2_0M2-A13-R3S101.vsi - C3G2_0M2-A13-R3S101.vsi #34.tif	R3S101	67824	1528107	4	0.0443843	-1.67
C3G2_0M2-A13-R3S101.vsi - C3G2_0M2-A13-R3S101.vsi #40.tif	R3S101	88150	1498867	5	0.0588111	-1.77
C3G2_0M2-A13-R3S101.vsi - C3G2_0M2-A13-R3S101.vsi #46.tif	R3S101	99970	1511870	6	0.0661234	-1.47
C3G2_0M2-A13-R3S101.vsi - C3G2_0M2-A13-R3S101.vsi #52.tif	R3S101	73869	1511309	7	0.0488775	-0.97
C3G2_0M2-A13-R3S101.vsi - C3G2_0M2-A13-R3S101.vsi #58.tif	R3S101	132874	1416594	8	0.0937982	-0.27
C3G2_0M2-A13-R3S101.vsi - C3G2_0M2-A13-R3S101.vsi #64.tif	R3S101	88580	1447837	9	0.0611809	-0.47

## Sheet: C4G1M2(C4L1R2)_Saline_CHR2
ROI Number per Section	Area	FolderPath
1	109733	C:\Users\WhelanImageRig\Desktop\A13_SlideScanner Viral ROI\CHR2-Saline\C4G1M2(C4L1R2)\R2S101\Section1
2	1710605	C:\Users\WhelanImageRig\Desktop\A13_SlideScanner Viral ROI\CHR2-Saline\C4G1M2(C4L1R2)\R2S101\Section1
1	84988	C:\Users\WhelanImageRig\Desktop\A13_SlideScanner Viral ROI\CHR2-Saline\C4G1M2(C4L1R2)\R2S101\Section2
2	9412	C:\Users\WhelanImageRig\Desktop\A13_SlideScanner Viral ROI\CHR2-Saline\C4G1M2(C4L1R2)\R2S101\Section2
3	7602	C:\Users\WhelanImageRig\Desktop\A13_SlideScanner Viral ROI\CHR2-Saline\C4G1M2(C4L1R2)\R2S101\Section2
4	1667793	C:\Users\WhelanImageRig\Desktop\A13_SlideScanner Viral ROI\CHR2-Saline\C4G1M2(C4L1R2)\R2S101\Section2
1	83297	C:\Users\WhelanImageRig\Desktop\A13_SlideScanner Viral ROI\CHR2-Saline\C4G1M2(C4L1R2)\R2S101\Section3
2	1670867	C:\Users\WhelanImageRig\Desktop\A13_SlideScanner Viral ROI\CHR2-Saline\C4G1M2(C4L1R2)\R2S101\Section3
1	113189	C:\Users\WhelanImageRig\Desktop\A13_SlideScanner Viral ROI\CHR2-Saline\C4G1M2(C4L1R2)\R2S101\Section4
2	4385	C:\Users\WhelanImageRig\Desktop\A13_SlideScanner Viral ROI\CHR2-Saline\C4G1M2(C4L1R2)\R2S101\Section4
3	3375	C:\Users\WhelanImageRig\Desktop\A13_SlideScanner Viral ROI\CHR2-Saline\C4G1M2(C4L1R2)\R2S101\Section4
4	9802	C:\Users\WhelanImageRig\Desktop\A13_SlideScanner Viral ROI\CHR2-Saline\C4G1M2(C4L1R2)\R2S101\Section4
5	4754	C:\Users\WhelanImageRig\Desktop\A13_SlideScanner Viral ROI\CHR2-Saline\C4G1M2(C4L1R2)\R2S101\Section4
6	1694588	C:\Users\WhelanImageRig\Desktop\A13_SlideScanner Viral ROI\CHR2-Saline\C4G1M2(C4L1R2)\R2S101\Section4
1	66278	C:\Users\WhelanImageRig\Desktop\A13_SlideScanner Viral ROI\CHR2-Saline\C4G1M2(C4L1R2)\R2S101\Section5
2	1658126	C:\Users\WhelanImageRig\Desktop\A13_SlideScanner Viral ROI\CHR2-Saline\C4G1M2(C4L1R2)\R2S101\Section5
1	80357	C:\Users\WhelanImageRig\Desktop\A13_SlideScanner Viral ROI\CHR2-Saline\C4G1M2(C4L1R2)\R2S101\Section6
2	1635439	C:\Users\WhelanImageRig\Desktop\A13_SlideScanner Viral ROI\CHR2-Saline\C4G1M2(C4L1R2)\R2S101\Section6
1	77097	C:\Users\WhelanImageRig\Desktop\A13_SlideScanner Viral ROI\CHR2-Saline\C4G1M2(C4L1R2)\R2S101\Section7
2	1751174	C:\Users\WhelanImageRig\Desktop\A13_SlideScanner Viral ROI\CHR2-Saline\C4G1M2(C4L1R2)\R2S101\Section7
1	191689	C:\Users\WhelanImageRig\Desktop\A13_SlideScanner Viral ROI\CHR2-Saline\C4G1M2(C4L1R2)\R3S101\Section1
2	4620	C:\Users\WhelanImageRig\Desktop\A13_SlideScanner Viral ROI\CHR2-Saline\C4G1M2(C4L1R2)\R3S101\Section1
3	1505199	C:\Users\WhelanImageRig\Desktop\A13_SlideScanner Viral ROI\CHR2-Saline\C4G1M2(C4L1R2)\R3S101\Section1
1	84270	C:\Users\WhelanImageRig\Desktop\A13_SlideScanner Viral ROI\CHR2-Saline\C4G1M2(C4L1R2)\R3S101\Section10
2	8401	C:\Users\WhelanImageRig\Desktop\A13_SlideScanner Viral ROI\CHR2-Saline\C4G1M2(C4L1R2)\R3S101\Section10
3	13673	C:\Users\WhelanImageRig\Desktop\A13_SlideScanner Viral ROI\CHR2-Saline\C4G1M2(C4L1R2)\R3S101\Section10
4	2389	C:\Users\WhelanImageRig\Desktop\A13_SlideScanner Viral ROI\CHR2-Saline\C4G1M2(C4L1R2)\R3S101\Section10
5	5485	C:\Users\WhelanImageRig\Desktop\A13_SlideScanner Viral ROI\CHR2-Saline\C4G1M2(C4L1R2)\R3S101\Section10
6	1657779	C:\Users\WhelanImageRig\Desktop\A13_SlideScanner Viral ROI\CHR2-Saline\C4G1M2(C4L1R2)\R3S101\Section10
1	73879	C:\Users\WhelanImageRig\Desktop\A13_SlideScanner Viral ROI\CHR2-Saline\C4G1M2(C4L1R2)\R3S101\Section11
2	6205	C:\Users\WhelanImageRig\Desktop\A13_SlideScanner Viral ROI\CHR2-Saline\C4G1M2(C4L1R2)\R3S101\Section11
3	14587	C:\Users\WhelanImageRig\Desktop\A13_SlideScanner Viral ROI\CHR2-Saline\C4G1M2(C4L1R2)\R3S101\Section11
4	3612	C:\Users\WhelanImageRig\Desktop\A13_SlideScanner Viral ROI\CHR2-Saline\C4G1M2(C4L1R2)\R3S101\Section11
5	1669455	C:\Users\WhelanImageRig\Desktop\A13_SlideScanner Viral ROI\CHR2-Saline\C4G1M2(C4L1R2)\R3S101\Section11
1	179657	C:\Users\WhelanImageRig\Desktop\A13_SlideScanner Viral ROI\CHR2-Saline\C4G1M2(C4L1R2)\R3S101\Section12
2	5193	C:\Users\WhelanImageRig\Desktop\A13_SlideScanner Viral ROI\CHR2-Saline\C4G1M2(C4L1R2)\R3S101\Section12
3	8541	C:\Users\WhelanImageRig\Desktop\A13_SlideScanner Viral ROI\CHR2-Saline\C4G1M2(C4L1R2)\R3S101\Section12
4	6788	C:\Users\WhelanImageRig\Desktop\A13_SlideScanner Viral ROI\CHR2-Saline\C4G1M2(C4L1R2)\R3S101\Section12
5	1611812	C:\Users\WhelanImageRig\Desktop\A13_SlideScanner Viral ROI\CHR2-Saline\C4G1M2(C4L1R2)\R3S101\Section12
1	245321	C:\Users\WhelanImageRig\Desktop\A13_SlideScanner Viral ROI\CHR2-Saline\C4G1M2(C4L1R2)\R3S101\Section2
2	2968	C:\Users\WhelanImageRig\Desktop\A13_SlideScanner Viral ROI\CHR2-Saline\C4G1M2(C4L1R2)\R3S101\Section2
3	9136	C:\Users\WhelanImageRig\Desktop\A13_SlideScanner Viral ROI\CHR2-Saline\C4G1M2(C4L1R2)\R3S101\Section2
4	1624613	C:\Users\WhelanImageRig\Desktop\A13_SlideScanner Viral ROI\CHR2-Saline\C4G1M2(C4L1R2)\R3S101\Section2
1	95913	C:\Users\WhelanImageRig\Desktop\A13_SlideScanner Viral ROI\CHR2-Saline\C4G1M2(C4L1R2)\R3S101\Section3
2	8841	C:\Users\WhelanImageRig\Desktop\A13_SlideScanner Viral ROI\CHR2-Saline\C4G1M2(C4L1R2)\R3S101\Section3
3	7357	C:\Users\WhelanImageRig\Desktop\A13_SlideScanner Viral ROI\CHR2-Saline\C4G1M2(C4L1R2)\R3S101\Section3
4	1280	C:\Users\WhelanImageRig\Desktop\A13_SlideScanner Viral ROI\CHR2-Saline\C4G1M2(C4L1R2)\R3S101\Section3
5	1700074	C:\Users\WhelanImageRig\Desktop\A13_SlideScanner Viral ROI\CHR2-Saline\C4G1M2(C4L1R2)\R3S101\Section3
1	141123	C:\Users\WhelanImageRig\Desktop\A13_SlideScanner Viral ROI\CHR2-Saline\C4G1M2(C4L1R2)\R3S101\Section4
2	10354	C:\Users\WhelanImageRig\Desktop\A13_SlideScanner Viral ROI\CHR2-Saline\C4G1M2(C4L1R2)\R3S101\Section4
3	1683280	C:\Users\WhelanImageRig\Desktop\A13_SlideScanner Viral ROI\CHR2-Saline\C4G1M2(C4L1R2)\R3S101\Section4
1	187502	C:\Users\WhelanImageRig\Desktop\A13_SlideScanner Viral ROI\CHR2-Saline\C4G1M2(C4L1R2)\R3S101\Section5
2	4869	C:\Users\WhelanImageRig\Desktop\A13_SlideScanner Viral ROI\CHR2-Saline\C4G1M2(C4L1R2)\R3S101\Section5
3	3219	C:\Users\WhelanImageRig\Desktop\A13_SlideScanner Viral ROI\CHR2-Saline\C4G1M2(C4L1R2)\R3S101\Section5
4	12576	C:\Users\WhelanImageRig\Desktop\A13_SlideScanner Viral ROI\CHR2-Saline\C4G1M2(C4L1R2)\R3S101\Section5
5	1958	C:\Users\WhelanImageRig\Desktop\A13_SlideScanner Viral ROI\CHR2-Saline\C4G1M2(C4L1R2)\R3S101\Section5
6	1525416	C:\Users\WhelanImageRig\Desktop\A13_SlideScanner Viral ROI\CHR2-Saline\C4G1M2(C4L1R2)\R3S101\Section5
1	197201	C:\Users\WhelanImageRig\Desktop\A13_SlideScanner Viral ROI\CHR2-Saline\C4G1M2(C4L1R2)\R3S101\Section6
2	7293	C:\Users\WhelanImageRig\Desktop\A13_SlideScanner Viral ROI\CHR2-Saline\C4G1M2(C4L1R2)\R3S101\Section6
3	4684	C:\Users\WhelanImageRig\Desktop\A13_SlideScanner Viral ROI\CHR2-Saline\C4G1M2(C4L1R2)\R3S101\Section6
4	1575522	C:\Users\WhelanImageRig\Desktop\A13_SlideScanner Viral ROI\CHR2-Saline\C4G1M2(C4L1R2)\R3S101\Section6
1	166719	C:\Users\WhelanImageRig\Desktop\A13_SlideScanner Viral ROI\CHR2-Saline\C4G1M2(C4L1R2)\R3S101\Section7
2	3891	C:\Users\WhelanImageRig\Desktop\A13_SlideScanner Viral ROI\CHR2-Saline\C4G1M2(C4L1R2)\R3S101\Section7
3	9116	C:\Users\WhelanImageRig\Desktop\A13_SlideScanner Viral ROI\CHR2-Saline\C4G1M2(C4L1R2)\R3S101\Section7
4	11004	C:\Users\WhelanImageRig\Desktop\A13_SlideScanner Viral ROI\CHR2-Saline\C4G1M2(C4L1R2)\R3S101\Section7
5	1619442	C:\Users\WhelanImageRig\Desktop\A13_SlideScanner Viral ROI\CHR2-Saline\C4G1M2(C4L1R2)\R3S101\Section7
1	121652	C:\Users\WhelanImageRig\Desktop\A13_SlideScanner Viral ROI\CHR2-Saline\C4G1M2(C4L1R2)\R3S101\Section8
2	7792	C:\Users\WhelanImageRig\Desktop\A13_SlideScanner Viral ROI\CHR2-Saline\C4G1M2(C4L1R2)\R3S101\Section8
3	1720569	C:\Users\WhelanImageRig\Desktop\A13_SlideScanner Viral ROI\CHR2-Saline\C4G1M2(C4L1R2)\R3S101\Section8
1	123060	C:\Users\WhelanImageRig\Desktop\A13_SlideScanner Viral ROI\CHR2-Saline\C4G1M2(C4L1R2)\R3S101\Section9
2	2401	C:\Users\WhelanImageRig\Desktop\A13_SlideScanner Viral ROI\CHR2-Saline\C4G1M2(C4L1R2)\R3S101\Section9
3	2671	C:\Users\WhelanImageRig\Desktop\A13_SlideScanner Viral ROI\CHR2-Saline\C4G1M2(C4L1R2)\R3S101\Section9
4	26442	C:\Users\WhelanImageRig\Desktop\A13_SlideScanner Viral ROI\CHR2-Saline\C4G1M2(C4L1R2)\R3S101\Section9
5	1480854	C:\Users\WhelanImageRig\Desktop\A13_SlideScanner Viral ROI\CHR2-Saline\C4G1M2(C4L1R2)\R3S101\Section9
1	79590	C:\Users\WhelanImageRig\Desktop\A13_SlideScanner Viral ROI\CHR2-Saline\C4G1M2(C4L1R2)\R3S201\Section1
2	1742305	C:\Users\WhelanImageRig\Desktop\A13_SlideScanner Viral ROI\CHR2-Saline\C4G1M2(C4L1R2)\R3S201\Section1
1	81971	C:\Users\WhelanImageRig\Desktop\A13_SlideScanner Viral ROI\CHR2-Saline\C4G1M2(C4L1R2)\R3S201\Section2
2	1563977	C:\Users\WhelanImageRig\Desktop\A13_SlideScanner Viral ROI\CHR2-Saline\C4G1M2(C4L1R2)\R3S201\Section2
1	105126	C:\Users\WhelanImageRig\Desktop\A13_SlideScanner Viral ROI\CHR2-Saline\C4G1M2(C4L1R2)\R3S201\Section3
2	1758833	C:\Users\WhelanImageRig\Desktop\A13_SlideScanner Viral ROI\CHR2-Saline\C4G1M2(C4L1R2)\R3S201\Section3
1	84884	C:\Users\WhelanImageRig\Desktop\A13_SlideScanner Viral ROI\CHR2-Saline\C4G1M2(C4L1R2)\R3S201\Section4
2	1660355	C:\Users\WhelanImageRig\Desktop\A13_SlideScanner Viral ROI\CHR2-Saline\C4G1M2(C4L1R2)\R3S201\Section4
1	88632	C:\Users\WhelanImageRig\Desktop\A13_SlideScanner Viral ROI\CHR2-Saline\C4G1M2(C4L1R2)\R3S201\Section5
2	10205	C:\Users\WhelanImageRig\Desktop\A13_SlideScanner Viral ROI\CHR2-Saline\C4G1M2(C4L1R2)\R3S201\Section5
3	11948	C:\Users\WhelanImageRig\Desktop\A13_SlideScanner Viral ROI\CHR2-Saline\C4G1M2(C4L1R2)\R3S201\Section5
4	1607021	C:\Users\WhelanImageRig\Desktop\A13_SlideScanner Viral ROI\CHR2-Saline\C4G1M2(C4L1R2)\R3S201\Section5
1	88422	C:\Users\WhelanImageRig\Desktop\A13_SlideScanner Viral ROI\CHR2-Saline\C4G1M2(C4L1R2)\R3S201\Section6
2	10818	C:\Users\WhelanImageRig\Desktop\A13_SlideScanner Viral ROI\CHR2-Saline\C4G1M2(C4L1R2)\R3S201\Section6
3	4701	C:\Users\WhelanImageRig\Desktop\A13_SlideScanner Viral ROI\CHR2-Saline\C4G1M2(C4L1R2)\R3S201\Section6
4	1703257	C:\Users\WhelanImageRig\Desktop\A13_SlideScanner Viral ROI\CHR2-Saline\C4G1M2(C4L1R2)\R3S201\Section6
1	48580	C:\Users\WhelanImageRig\Desktop\A13_SlideScanner Viral ROI\CHR2-Saline\C4G1M2(C4L1R2)\R3S201\Section7
2	1554209	C:\Users\WhelanImageRig\Desktop\A13_SlideScanner Viral ROI\CHR2-Saline\C4G1M2(C4L1R2)\R3S201\Section7
Image	Folder	Area of Viral Spread	Area Total	Section	Area Percent	AP?
C4L1R2-A13-R2S101.vsi - C4L1R2-A13-R2S101.vsi #16.tif	R2S101	109733	1710605	1	0.0641486	-1.97
C4L1R2-A13-R2S101.vsi - C4L1R2-A13-R2S101.vsi #22.tif	R2S101	102002	1667793	2	0.0611599	-1.67
C4L1R2-A13-R2S101.vsi - C4L1R2-A13-R2S101.vsi #28.tif	R2S101	83297	1670867	3	0.0498526	-2.17
C4L1R2-A13-R2S101.vsi - C4L1R2-A13-R2S101.vsi #58.tif	R2S101	135505	1694588	4	0.0799634	-1.47
C4L1R2-A13-R2S101.vsi - C4L1R2-A13-R2S101.vsi #34.tif	R2S101	66278	1658126	5	0.0399716	-1.87
C4L1R2-A13-R2S101.vsi - C4L1R2-A13-R2S101.vsi #46.tif	R2S101	80357	1635439	6	0.0491348	-2.07
C4L1R2-A13-R2S101.vsi - C4L1R2-A13-R2S101.vsi #52.tif	R2S101	77097	1751174	7	0.0440259	-1.97
C4L1R2-A13-R3S101.vsi - C4L1R2-A13-R3S101.vsi #16.tif	R3S101	196309	1505199	1	0.130421	-0.47
C4L1R2-A13-R3S101.vsi - C4L1R2-A13-R3S101.vsi #70.tif	R3S101	114218	1657779	10	0.0688982	-0.97
C4L1R2-A13-R3S101.vsi - C4L1R2-A13-R3S101.vsi #76.tif	R3S101	98283	1669455	11	0.0588713	-0.97
C4L1R2-A13-R3S101.vsi - C4L1R2-A13-R3S101.vsi #82.tif	R3S101	1887855	1611812	12	1.17126	-0.67
C4L1R2-A13-R3S101.vsi - C4L1R2-A13-R3S101.vsi #22.tif	R3S101	257431	1624613	2	0.158457	-0.77
C4L1R2-A13-R3S101.vsi - C4L1R2-A13-R3S101.vsi #28.tif	R3S101	113401	1700074	3	0.0667036	-1.57
C4L1R2-A13-R3S101.vsi - C4L1R2-A13-R3S101.vsi #34.tif	R3S101	151477	1683280	4	0.0899892	-1.27
C4L1R2-A13-R3S101.vsi - C4L1R2-A13-R3S101.vsi #40.tif	R3S101	210124	1525416	5	0.137749	-0.37
C4L1R2-A13-R3S101.vsi - C4L1R2-A13-R3S101.vsi #46.tif	R3S101	209178	1575522	6	0.132767	-0.57
C4L1R2-A13-R3S101.vsi - C4L1R2-A13-R3S101.vsi #52.tif	R3S101	190730	1619442	7	0.117775	-0.87
C4L1R2-A13-R3S101.vsi - C4L1R2-A13-R3S101.vsi #58.tif	R3S101	129444	1720569	8	0.0752333	-1.37
C4L1R2-A13-R3S101.vsi - C4L1R2-A13-R3S101.vsi #64.tif	R3S101	154574	1480854	9	0.104382	-0.27
C4L1R2-A13-R3S201.vsi - C4L1R2-A13-R3S201.vsi #16.tif	R3S201	79590	1742305	1	0.0456809	-1.97
C4L1R2-A13-R3S201.vsi - C4L1R2-A13-R3S201.vsi #22.tif	R3S201	81971	1563977	2	0.0524119	-2.17
C4L1R2-A13-R3S201.vsi - C4L1R2-A13-R3S201.vsi #28.tif	R3S201	105126	1758833	3	0.0597703	-2.07
C4L1R2-A13-R3S201.vsi - C4L1R2-A13-R3S201.vsi #34.tif	R3S201	84884	1660355	4	0.051124	-1.87
C4L1R2-A13-R3S201.vsi - C4L1R2-A13-R3S201.vsi #40.tif	R3S201	110785	1607021	5	0.0689381	-1.77
C4L1R2-A13-R3S201.vsi - C4L1R2-A13-R3S201.vsi #46.tif	R3S201	103941	1703257	6	0.0610248	-1.67
C4L1R2-A13-R3S201.vsi - C4L1R2-A13-R3S201.vsi #52.tif	R3S201	48580	1554209	7	0.0312571	-2.27

## Sheet: C2G4M2_Saline_CHR2
ROI Number per Section	Area	FolderPath
1	1.08	J:\My Drive\A13_SlideScanner Viral ROI\CHR2-Saline\C2G4M2 (C2G20M2)\Slide 1\Section1
2	56.16	J:\My Drive\A13_SlideScanner Viral ROI\CHR2-Saline\C2G4M2 (C2G20M2)\Slide 1\Section1
1	0.67	J:\My Drive\A13_SlideScanner Viral ROI\CHR2-Saline\C2G4M2 (C2G20M2)\Slide 1\Section10
2	53.71	J:\My Drive\A13_SlideScanner Viral ROI\CHR2-Saline\C2G4M2 (C2G20M2)\Slide 1\Section10
1	0.93	J:\My Drive\A13_SlideScanner Viral ROI\CHR2-Saline\C2G4M2 (C2G20M2)\Slide 1\Section11
2	52.92	J:\My Drive\A13_SlideScanner Viral ROI\CHR2-Saline\C2G4M2 (C2G20M2)\Slide 1\Section11
1	1.23	J:\My Drive\A13_SlideScanner Viral ROI\CHR2-Saline\C2G4M2 (C2G20M2)\Slide 1\Section2
2	56.96	J:\My Drive\A13_SlideScanner Viral ROI\CHR2-Saline\C2G4M2 (C2G20M2)\Slide 1\Section2
1	0.08	J:\My Drive\A13_SlideScanner Viral ROI\CHR2-Saline\C2G4M2 (C2G20M2)\Slide 1\Section3
2	58.93	J:\My Drive\A13_SlideScanner Viral ROI\CHR2-Saline\C2G4M2 (C2G20M2)\Slide 1\Section3
1	0.02	J:\My Drive\A13_SlideScanner Viral ROI\CHR2-Saline\C2G4M2 (C2G20M2)\Slide 1\Section4
2	57.86	J:\My Drive\A13_SlideScanner Viral ROI\CHR2-Saline\C2G4M2 (C2G20M2)\Slide 1\Section4
1	0.42	J:\My Drive\A13_SlideScanner Viral ROI\CHR2-Saline\C2G4M2 (C2G20M2)\Slide 1\Section5
2	54.07	J:\My Drive\A13_SlideScanner Viral ROI\CHR2-Saline\C2G4M2 (C2G20M2)\Slide 1\Section5
1	0.54	J:\My Drive\A13_SlideScanner Viral ROI\CHR2-Saline\C2G4M2 (C2G20M2)\Slide 1\Section6
2	52.28	J:\My Drive\A13_SlideScanner Viral ROI\CHR2-Saline\C2G4M2 (C2G20M2)\Slide 1\Section6
1	0.58	J:\My Drive\A13_SlideScanner Viral ROI\CHR2-Saline\C2G4M2 (C2G20M2)\Slide 2\Section 1
2	51.45	J:\My Drive\A13_SlideScanner Viral ROI\CHR2-Saline\C2G4M2 (C2G20M2)\Slide 2\Section 1
1	0.54	J:\My Drive\A13_SlideScanner Viral ROI\CHR2-Saline\C2G4M2 (C2G20M2)\Slide 2\Section6
2	55.51	J:\My Drive\A13_SlideScanner Viral ROI\CHR2-Saline\C2G4M2 (C2G20M2)\Slide 2\Section6
1	21110	J:\My Drive\A13_SlideScanner Viral ROI\CHR2-Saline\C2G4M2 (C2G20M2)\Slide 3\Section1
2	1533762	J:\My Drive\A13_SlideScanner Viral ROI\CHR2-Saline\C2G4M2 (C2G20M2)\Slide 3\Section1
1	33684	J:\My Drive\A13_SlideScanner Viral ROI\CHR2-Saline\C2G4M2 (C2G20M2)\Slide 3\Section2
2	1519416	J:\My Drive\A13_SlideScanner Viral ROI\CHR2-Saline\C2G4M2 (C2G20M2)\Slide 3\Section2
1	24250	J:\My Drive\A13_SlideScanner Viral ROI\CHR2-Saline\C2G4M2 (C2G20M2)\Slide 3\Section3
2	1545406	J:\My Drive\A13_SlideScanner Viral ROI\CHR2-Saline\C2G4M2 (C2G20M2)\Slide 3\Section3
1	1441315	J:\My Drive\A13_SlideScanner Viral ROI\CHR2-Saline\C2G4M2 (C2G20M2)\Slide 3\Section4
2	35697	J:\My Drive\A13_SlideScanner Viral ROI\CHR2-Saline\C2G4M2 (C2G20M2)\Slide 3\Section4
1	17561	J:\My Drive\A13_SlideScanner Viral ROI\CHR2-Saline\C2G4M2 (C2G20M2)\Slide 3\Section5
2	1501128	J:\My Drive\A13_SlideScanner Viral ROI\CHR2-Saline\C2G4M2 (C2G20M2)\Slide 3\Section5
1	30438	J:\My Drive\A13_SlideScanner Viral ROI\CHR2-Saline\C2G4M2 (C2G20M2)\Slide 3\Section6
2	1602271	J:\My Drive\A13_SlideScanner Viral ROI\CHR2-Saline\C2G4M2 (C2G20M2)\Slide 3\Section6
1	6608	J:\My Drive\A13_SlideScanner Viral ROI\CHR2-Saline\C2G4M2 (C2G20M2)\Slide 3\Section7
2	1521183	J:\My Drive\A13_SlideScanner Viral ROI\CHR2-Saline\C2G4M2 (C2G20M2)\Slide 3\Section7
1	63739	J:\My Drive\A13_SlideScanner Viral ROI\CHR2-Saline\C2G4M2 (C2G20M2)\Slide 4\Section1
2	1770092	J:\My Drive\A13_SlideScanner Viral ROI\CHR2-Saline\C2G4M2 (C2G20M2)\Slide 4\Section1
1	24918	J:\My Drive\A13_SlideScanner Viral ROI\CHR2-Saline\C2G4M2 (C2G20M2)\Slide 4\Section2
2	2103409	J:\My Drive\A13_SlideScanner Viral ROI\CHR2-Saline\C2G4M2 (C2G20M2)\Slide 4\Section2
1	1866306	J:\My Drive\A13_SlideScanner Viral ROI\CHR2-Saline\C2G4M2 (C2G20M2)\Slide 4\Section3
2	26144	J:\My Drive\A13_SlideScanner Viral ROI\CHR2-Saline\C2G4M2 (C2G20M2)\Slide 4\Section3
1	15457	J:\My Drive\A13_SlideScanner Viral ROI\CHR2-Saline\C2G4M2 (C2G20M2)\Slide 4\Section4
2	1771297	J:\My Drive\A13_SlideScanner Viral ROI\CHR2-Saline\C2G4M2 (C2G20M2)\Slide 4\Section4
1	27113	J:\My Drive\A13_SlideScanner Viral ROI\CHR2-Saline\C2G4M2 (C2G20M2)\Slide 4\Section5
2	1885198	J:\My Drive\A13_SlideScanner Viral ROI\CHR2-Saline\C2G4M2 (C2G20M2)\Slide 4\Section5
1	29752	J:\My Drive\A13_SlideScanner Viral ROI\CHR2-Saline\C2G4M2 (C2G20M2)\Slide 4\Section6
2	2078837	J:\My Drive\A13_SlideScanner Viral ROI\CHR2-Saline\C2G4M2 (C2G20M2)\Slide 4\Section6
Section	Folder	Area of Viral Spread	Area total	Section	Area Percent	AP?
1	J:\My Drive\A13_SlideScanner Viral ROI\CHR2-Saline\C2G4M2 (C2G20M2)\Slide 1	1.08	56.16	1	0.0192308	-1.69
2	J:\My Drive\A13_SlideScanner Viral ROI\CHR2-Saline\C2G4M2 (C2G20M2)\Slide 1	1.23	56.96	2	0.0215941	-1.99
3	J:\My Drive\A13_SlideScanner Viral ROI\CHR2-Saline\C2G4M2 (C2G20M2)\Slide 1	0.08	58.93	3	0.00135754	-1.15
4	J:\My Drive\A13_SlideScanner Viral ROI\CHR2-Saline\C2G4M2 (C2G20M2)\Slide 1	0.02	57.86	4	0.000345662	-0.9
5	J:\My Drive\A13_SlideScanner Viral ROI\CHR2-Saline\C2G4M2 (C2G20M2)\Slide 1	0.42	54.07	5	0.00776771	-1.38
6	J:\My Drive\A13_SlideScanner Viral ROI\CHR2-Saline\C2G4M2 (C2G20M2)\Slide 1	0.54	52.28	6	0.010329	-1.6
10	J:\My Drive\A13_SlideScanner Viral ROI\CHR2-Saline\C2G4M2 (C2G20M2)\Slide 1	0.67	53.71	10	0.0124744	-1.19
11	J:\My Drive\A13_SlideScanner Viral ROI\CHR2-Saline\C2G4M2 (C2G20M2)\Slide 1	0.93	52.92	11	0.0175737	-1.92
1	J:\My Drive\A13_SlideScanner Viral ROI\CHR2-Saline\C2G4M2 (C2G20M2)\Slide 2	0.58	51.45	1	0.0112731	-1.54
6	J:\My Drive\A13_SlideScanner Viral ROI\CHR2-Saline\C2G4M2 (C2G20M2)\Slide 2	0.54	55.51	6	0.00972798	-1.7
1	J:\My Drive\A13_SlideScanner Viral ROI\CHR2-Saline\C2G4M2 (C2G20M2)\Slide 3	21110	1533762	1	0.0137635	-1.48
2	J:\My Drive\A13_SlideScanner Viral ROI\CHR2-Saline\C2G4M2 (C2G20M2)\Slide 3	33684	1519416	2	0.022169	-1.2
3	J:\My Drive\A13_SlideScanner Viral ROI\CHR2-Saline\C2G4M2 (C2G20M2)\Slide 3	24250	1545406	3	0.0156917	-1.43
4	J:\My Drive\A13_SlideScanner Viral ROI\CHR2-Saline\C2G4M2 (C2G20M2)\Slide 3	35697	1441315	4	0.024767	-1.02
5	J:\My Drive\A13_SlideScanner Viral ROI\CHR2-Saline\C2G4M2 (C2G20M2)\Slide 3	17561	1501128	5	0.0116985	-0.8
6	J:\My Drive\A13_SlideScanner Viral ROI\CHR2-Saline\C2G4M2 (C2G20M2)\Slide 3	30438	1602271	6	0.0189968	-1.76
7	J:\My Drive\A13_SlideScanner Viral ROI\CHR2-Saline\C2G4M2 (C2G20M2)\Slide 3	6608	1521183	7	0.00434399	-1.17
1	J:\My Drive\A13_SlideScanner Viral ROI\CHR2-Saline\C2G4M2 (C2G20M2)\Slide 4	63739	1770092	1	0.0360089	-0.69
2	J:\My Drive\A13_SlideScanner Viral ROI\CHR2-Saline\C2G4M2 (C2G20M2)\Slide 4	24918	2103409	2	0.0118465	-1.8
3	J:\My Drive\A13_SlideScanner Viral ROI\CHR2-Saline\C2G4M2 (C2G20M2)\Slide 4	26144	1866306	3	0.0140084	-1
4	J:\My Drive\A13_SlideScanner Viral ROI\CHR2-Saline\C2G4M2 (C2G20M2)\Slide 4	15457	1771297	4	0.00872637	-1.18
5	J:\My Drive\A13_SlideScanner Viral ROI\CHR2-Saline\C2G4M2 (C2G20M2)\Slide 4	27113	1885198	5	0.014382	-1.39
6	J:\My Drive\A13_SlideScanner Viral ROI\CHR2-Saline\C2G4M2 (C2G20M2)\Slide 4	29752	2078837	6	0.0143118	-1.63

[truncated: 2 more sheets: C3G2_0M3_Saline_CHR2, C4G1M3(C4L1R3)_Saline_CHR2]
