# Supplementary material for: Restoration of locomotor function following stimulation of the A13 region in Parkinson’s mouse models
Source: eLife. 2025 Sep 23;12:RP90832. doi: 10.7554/eLife.90832 (PMC12456956; doi:10.7554/eLife.90832)
Supplement: Figure 2—source data 1. [file elife-90832-fig2-data1.xlsx]

## Sheet: Raw Data - Intensity
6-OHDA eYFP	6-OHDA ChR2
4.731	9.065
1.668	4.496
3.925	6.595
1.074

## Sheet: Stats
Table Analyzed	Intensity
Column B	6-OHDA ChR2
vs.	vs.
Column A	6-OHDA eYFP
Unpaired t test
P value	0.0512
P value summary	ns
Significantly different (P < 0.05)?	No
One- or two-tailed P value?	Two-tailed
t, df	t=2.552, df=5
How big is the difference?
Mean of column A	2.85
Mean of column B	6.719
Difference between means (B - A) ± SEM	3.869 ± 1.516
95% confidence interval	-0.02849 to 7.767
R squared (eta squared)	0.5657
F test to compare variances
F, DFn, Dfd	1.697, 2, 3
P value	0.6427
P value summary	ns
Significantly different (P < 0.05)?	No
Data analyzed
Sample size, column A	4
Sample size, column B	3
