# Supplementary material for: Restoration of locomotor function following stimulation of the A13 region in Parkinson’s mouse models
Source: eLife. 2025 Sep 23;12:RP90832. doi: 10.7554/eLife.90832 (PMC12456956; doi:10.7554/eLife.90832)
Supplement: Figure 3—figure supplement 1—source data 1. [file elife-90832-fig3-figsupp1-data1.xlsx]

## Sheet: Raw Data
Baseline	Pre1	Pre2	Pre3	Pre4	Pre5
2340.02	1834.44	2707.35	2360.29	1719.34	1291.03
1460.29	2255.54	2608	2128.58	2043.12	1303.93
1903.96	1429.9	415.94	1246.37	1811.31	341.14
1676.26	1824.37	2166.2	1649.1	1838.96	2384.63
2108.75	1782.41	1355.85	2066.07	1919.71	2245.13
1728.01	712.95	2546.44	2624.68	2043.9	2379.41

## Sheet: Stats
Tests of Within-Subjects Effects
Measure:	Loco_DT
Source		Type IV Sum of Squares	df	Mean Square	F	Sig.	Partial Eta Squared	Noncent. Parameter	Observed Powera
Time	Sphericity Assumed	738762	5	147752	0.486	0.783	0.089	2.432	0.156
Error(Time)	Sphericity Assumed	7.59336e+06	25	303734
a. Computed using alpha = .05
