# Supplementary material for: Restoration of locomotor function following stimulation of the A13 region in Parkinson’s mouse models
Source: eLife. 2025 Sep 23;12:RP90832. doi: 10.7554/eLife.90832 (PMC12456956; doi:10.7554/eLife.90832)
Supplement: Figure 3—figure supplement 1—source data 2. [file elife-90832-fig3-figsupp1-data2.xlsx]

## Sheet: A 6-OHDA eYFP Normalized Data
eYFP Pre	eYPF Stim
0	0
33.333	100
33.333	0
100	66.666
66.666	33.333

## Sheet: A 6-OHDA eYFP Stats
Ranks
		N	Mean Rank	Sum of Ranks
DD_eYFP_stim - DD_eYFP_pre	Negative Ranks	3a	2	6
	Positive Ranks	1b	4	4
	Ties	1c
	Total	5
a. DD_eYFP_stim < DD_eYFP_pre
b. DD_eYFP_stim > DD_eYFP_pre
c. DD_eYFP_stim = DD_eYFP_pre
Test Statisticsa
	DD_eYFP_stim - DD_eYFP_pre
Z	-.368b
Asymp. Sig. (2-tailed)	0.713
a. Wilcoxon Signed Ranks Test
b. Based on positive ranks.

## Sheet: A 6-OHDA ChR2 Normalized Data
CHR2 Pre	CHR2 Stim
66.666	100
0	100
33.333	100
33.333	66.666
33.333	66.666

## Sheet: A 6-OHDA ChR2 Stats
Ranks
		N	Mean Rank	Sum of Ranks
DD_ChR2_stim - DD_ChR2_pre	Negative Ranks	0a	0	0
	Positive Ranks	5b	3	15
	Ties	0c
	Total	5
a. DD_ChR2_stim < DD_ChR2_pre
b. DD_ChR2_stim > DD_ChR2_pre
c. DD_ChR2_stim = DD_ChR2_pre
Test Statisticsa
	DD_ChR2_stim - DD_ChR2_pre
Z	-2.032b
Asymp. Sig. (2-tailed)	0.042
a. Wilcoxon Signed Ranks Test
b. Based on negative ranks.

## Sheet: B Locomotion Initiation Data
Sham ChR2	6-OHDA ChR2
4.01	16.9567
5.39	4.77667
8.33333	8.73667
11.1567	35.2
14.0533	12.565
23.31

## Sheet: B Locomotion Initiation Stats
Independent Samples Test
		Levene's Test for Equality of Variances		t-test for Equality of Means
		F	Sig.	t	df	Significance		Mean Difference	Std. Error Difference	95% Confidence Interval of the Difference
						One-Sided p	Two-Sided p			Lower	Upper
Loco_initiation	Equal variances assumed	0.004	0.953	0	9	0.5	1	0	0.60553	-1.3698	1.3698
	Equal variances not assumed			0	8.643	0.5	1	0	0.60553	-1.37848	1.37848
