# Supplementary material for: Restoration of locomotor function following stimulation of the A13 region in Parkinson’s mouse models
Source: eLife. 2025 Sep 23;12:RP90832. doi: 10.7554/eLife.90832 (PMC12456956; doi:10.7554/eLife.90832)
Supplement: Figure 3—source data 1. [file elife-90832-fig3-data1.xlsx]

## Sheet: 3F Distance - Raw Data
MouseID	Model	Virus	Pre	Stim	Post	Post2		Conversion to meters		Pre	Stim	Post	Post2
C1G3M2	6-OHDA	ChR2	207.11	501.547	394.063	403.507				0.20711	0.501547	0.394063	0.403507
C2G1M3	6-OHDA	ChR2	0	2970.36	0	0				0	2.97036	0	0
C3G1-1M1	6-OHDA	ChR2	213.61	2909.7	70.6633	0				0.21361	2.9097	0.0706633	0
C3G1-1M3	6-OHDA	ChR2	159.763	412.263	0	75.84				0.159763	0.412263	0	0.07584
C4G0M2	6-OHDA	ChR2	83.3467	1375.36	156.99	22.7133				0.0833467	1.37536	0.15699	0.0227133
C2G2M1	6-OHDA	eYFP	0	0	0	0				0	0	0	0
C2G2M3	6-OHDA	eYFP	62.26	235.923	125.047	124.123				0.06226	0.235923	0.125047	0.124123
C2G2M4	6-OHDA	eYFP	109.727	0	61.66	95.8633				0.109727	0	0.06166	0.0958633
C3G3M1	6-OHDA	eYFP	627.823	269.113	158.443	432.313				0.627823	0.269113	0.158443	0.432313
C3G3M2	6-OHDA	eYFP	243.337	69.01	149.843	77.7133				0.243337	0.06901	0.149843	0.0777133
C2G3M1	Saline	eYFP	1095.89	839.857	1416.23	1125.48				1.09589	0.839857	1.41623	1.12548
C2G3M2	Saline	eYFP	828.02	905.78	750.197	621.853				0.82802	0.90578	0.750197	0.621853
C4G2M4	Saline	eYFP	758.723	577.507	722.18	912.003				0.758723	0.577507	0.72218	0.912003
C4G3M0	Saline	eYFP	677.807	320.377	634.033	409.82				0.677807	0.320377	0.634033	0.40982
C4G3M4	Saline	eYFP	1267.86	1684.71	1872.25	1574.68				1.26786	1.68471	1.87225	1.57468
C2G2_0M2	Saline	ChR2	1378.52	3764.94	308.957	743.953				1.37852	3.76494	0.308957	0.743953
C4G1M2	Saline	ChR2	1049.21	4210.55	112.713	359.293				1.04921	4.21055	0.112713	0.359293
C4G1M3	Saline	ChR2	437.127	3061.38	602.393	0				0.437127	3.06138	0.602393	0
C5G1M1	Saline	ChR2	833.65	3321.89	698.773	411.097				0.83365	3.32189	0.698773	0.411097
C5G1M3	Saline	ChR2	877.157	1670.43	1158.23	1483.77				0.877157	1.67043	1.15823	1.48377
C5G3M0	Saline	ChR2	911.88	831.56	587.183	1088.59				0.91188	0.83156	0.587183	1.08859

## Sheet: 3F Distance - Stats
Three way MM ANOVA Results
Tests of Within-Subjects Effects
Measure: OFT Distance
Source		Type IV Sum of Squares	df	Mean Square	F	Sig.
Time	Greenhouse-Geisser	74.2281	1.56523	47.4231	6.192	0.00986345
Time * Model	Greenhouse-Geisser	7.50157	1.56523	4.79262	0.62577	0.504795
Time * Virus	Greenhouse-Geisser	93.2175	1.56523	59.555	7.77607	0.0039792
Time * Model * Virus	Greenhouse-Geisser	2.92959	1.56523	1.87166	0.244382	0.730636
Error(Time)	Greenhouse-Geisser	203.792	26.609	7.65876
	Huynh-Feldt	203.792	34.0004	5.9938
	Lower-bound	203.792	17	11.9877
Tests of Between-Subjects Effects
Measure: OFT Distance
Transformed Variable:
Source	Type IV Sum of Squares	df	Mean Square	F	Sig.
Intercept	832.335	1	832.335	183.258	< 0.001
Model	253.021	1	253.021	55.7084	< 0.001
Virus	9.70535	1	9.70535	2.13686	0.162036
Model * Virus	4.25221	1	4.25221	0.936222	0.346816
Error	77.212	17	4.54188
Time: Pairwise Comparisons
Measure: OFT Distance
(I) Time		Mean Difference (I-J)	Std. Error	Sig.b	95% Confidence Interval for Differenceb
					Lower Bound	Upper Bound
Pre	Stim	-1.87222	0.690528	0.088928	-3.93279	0.188341
	Post1	0.466667	0.387397	1	-0.689341	1.62267
	Post2	0.341667	0.335542	1	-0.659605	1.34294
Stim	Pre	1.87222	0.690528	0.088928	-0.188341	3.93279
	Post1	2.339*	0.767184	0.0435591	0.0495801	4.6282
	Post2	2.21389	0.886761	0.138648	-0.432243	4.86002
Post1	Pre	-0.466667	0.387397	1	-1.62267	0.689341
	Stim	-2.339*	0.767184	0.0435591	-4.6282	-0.0495801
	Post2	-0.125	0.428068	1	-1.40237	1.15237
Post2	Pre	-0.341667	0.335542	1	-1.34294	0.659605
	Stim	-2.21389	0.886761	0.138648	-4.86002	0.432243
	Post1	0.125	0.428068	1	-1.15237	1.40237
Based on estimated marginal means
*. The mean difference is significant at the .050 level.
b. Adjustment for multiple comparisons: Bonferroni.
Virus x Time: Pairwise Comparisons
Measure: OFT Distance
Virus			Mean Difference (I-J)	Std. Error	Sig.b	95% Confidence Interval for Differenceb
						Lower Bound	Upper Bound
ChR2	Pre	Stim	-4.178*	0.955088	0.00248059	-7.0278	-1.32776
		Post1	0.733333	0.535819	1	-0.865574	2.33224
		Post2	0.45	0.464098	1	-0.934887	1.83489
	Stim	Pre	4.178*	0.955088	0.00248059	1.32776	7.0278
		Post1	4.911*	1.06111	0.00144098	1.7447	8.07752
		Post2	4.628*	1.2265	0.00910051	0.967839	8.28772
	Post1	Pre	-0.733333	0.535819	1	-2.33224	0.865574
		Stim	-4.911*	1.06111	0.00144098	-8.07752	-1.7447
		Post2	-0.283333	0.592073	1	-2.0501	1.48344
	Post2	Pre	-0.45	0.464098	1	-1.83489	0.934887
		Stim	-4.628*	1.2265	0.00910051	-8.28772	-0.967839
		Post1	0.283333	0.592073	1	-1.48344	2.0501
eYFP	Pre	Stim	0.433333	0.997557	1	-2.54342	3.41008
		Post1	0.2	0.559645	1	-1.47	1.87
		Post2	0.233333	0.484734	1	-1.21313	1.6798
	Stim	Pre	-0.433333	0.997557	1	-3.41008	2.54342
		Post1	-0.233333	1.1083	1	-3.54054	3.07387
		Post2	-0.2	1.28104	1	-4.02268	3.62268
	Post1	Pre	-0.2	0.559645	1	-1.87	1.47
		Stim	0.233333	1.1083	1	-3.07387	3.54054
		Post2	0.0333333	0.6184	1	-1.812	1.87866
	Post2	Pre	-0.233333	0.484734	1	-1.6798	1.21313
		Stim	0.2	1.28104	1	-3.62268	4.02268
		Post1	-0.0333333	0.6184	1	-1.87866	1.812
Based on estimated marginal means
*. The mean difference is significant at the .050 level.
b. Adjustment for multiple comparisons: Bonferroni.
Virus x Time: Pairwise Comparisons
Measure: OFT Distance
Time			Mean Difference (I-J)	Std. Error	Sig.b	95% Confidence Interval for Differenceb
						Lower Bound	Upper Bound
Pre	ChR2	eYFP	-0.283333	0.487228	0.568521	-1.31129	0.744628
	eYFP	ChR2	0.283333	0.487228	0.568521	-0.744628	1.31129
Stim	ChR2	eYFP	4.328*	1.34554	0.00506569	1.48894	7.16662
	eYFP	ChR2	-4.328*	1.34554	0.00506569	-7.16662	-1.48894
Post1	ChR2	eYFP	-0.816667	0.615792	0.202315	-2.11587	0.48254
	eYFP	ChR2	0.816667	0.615792	0.202315	-0.48254	2.11587
Post2	ChR2	eYFP	-0.5	0.860878	0.568994	-2.31629	1.31629
	eYFP	ChR2	0.5	0.860878	0.568994	-1.31629	2.31629
Based on estimated marginal means
*. The mean difference is significant at the .050 level.
b. Adjustment for multiple comparisons: Bonferroni.

## Sheet: 3G Bouts - Raw Data
MouseID	Model	Virus	Pre	Stim	Post	Post2
C1G3M2	6-OHDA	ChR2	1	3	1.66667	2.33333
C2G1M3	6-OHDA	ChR2	0	11	0	0
C3G1-1M1	6-OHDA	ChR2	1	10.3333	0	0
C3G1-1M3	6-OHDA	ChR2	0.666667	1.66667	0	0.333333
C4G0M2	6-OHDA	ChR2	0.666667	4.66667	1	0.333333
C2G2M1	6-OHDA	eYFP	0	0	0	0
C2G2M3	6-OHDA	eYFP	0.666667	2	0.666667	0.666667
C2G2M4	6-OHDA	eYFP	0.333333	0	0.666667	0.666667
C3G3M1	6-OHDA	eYFP	2.33333	2	1.33333	2.66667
C3G3M2	6-OHDA	eYFP	1.33333	0.333333	0.666667	0.666667
C2G3M1	Saline	eYFP	7	3.33333	6.33333	5.33333
C2G3M2	Saline	eYFP	4.66667	4	3.33333	4
C4G2M4	Saline	eYFP	4	3	4.33333	5
C4G3M0	Saline	eYFP	4.33333	2.33333	3.66667	2.66667
C4G3M4	Saline	eYFP	5.66667	9	7.33333	6.33333
C2G2_0M2	Saline	ChR2	5.66667	9.33333	1.66667	3
C4G1M2	Saline	ChR2	6	12.6667	1	2.66667
C4G1M3	Saline	ChR2	2.33333	8	4.66667	0
C5G1M1	Saline	ChR2	3.66667	6.66667	5	2.66667
C5G1M3	Saline	ChR2	5.66667	7	5.66667	7.66667
C5G3M0	Saline	ChR2	5.66667	2.66667	3	8

## Sheet: 3G Bouts - Stats
Three way MM ANOVA Results
Tests of Within-Subjects Effects
Measure: OFT Bouts
Source		Type IV Sum of Squares	df	Mean Square	F	Sig.	Partial Eta Squared	Noncent. Parameter	Observed Powera
Time	Greenhouse-Geisser	74.2281	1.56523	47.4231	6.192	0.00986345	0.266989	9.69193	0.791913
Time * Model	Greenhouse-Geisser	7.50157	1.56523	4.79262	0.62577	0.504795	0.0355031	0.979476	0.133676
Time * Virus	Greenhouse-Geisser	93.2175	1.56523	59.555	7.77607	0.0039792	0.313854	12.1714	0.877571
Time * Model * Virus	Greenhouse-Geisser	2.92959	1.56523	1.87166	0.244382	0.730636	0.0141717	0.382515	0.0813431
Error(Time)	Greenhouse-Geisser	203.792	26.609	7.65876
a. Computed using alpha = .05
Tests of Between-Subjects Effects
Measure: OFT Bouts
Transformed Variable:
Source	Type IV Sum of Squares	df	Mean Square	F	Sig.	Partial Eta Squared	Noncent. Parameter	Observed Powera
Intercept	832.335	1	832.335	183.258	< 0.001	0.915109	183.258	1
Model	253.021	1	253.021	55.7084	< 0.001	0.766189	55.7084	1
Virus	9.70535	1	9.70535	2.13686	0.162036	0.111662	2.13686	0.281317
Model * Virus	4.25221	1	4.25221	0.936222	0.346816	0.0521973	0.936222	0.149759
Error	77.212	17	4.54188
a. Computed using alpha = .05
Time: Pairwise Comparisons
Measure: OFT Bouts
(I) Time		Mean Difference (I-J)	Std. Error	Sig.b	95% Confidence Interval for Differenceb
					Lower Bound	Upper Bound
Pre	Stim	-1.87222	0.690528	0.088928	-3.93279	0.188341
	Post1	0.466667	0.387397	1	-0.689341	1.62267
	Post2	0.341667	0.335542	1	-0.659605	1.34294
Stim	Pre	1.87222	0.690528	0.088928	-0.188341	3.93279
	Post1	2.339*	0.767184	0.0435591	0.0495801	4.6282
	Post2	2.21389	0.886761	0.138648	-0.432243	4.86002
Post1	Pre	-0.466667	0.387397	1	-1.62267	0.689341
	Stim	-2.339*	0.767184	0.0435591	-4.6282	-0.0495801
	Post2	-0.125	0.428068	1	-1.40237	1.15237
Post2	Pre	-0.341667	0.335542	1	-1.34294	0.659605
	Stim	-2.21389	0.886761	0.138648	-4.86002	0.432243
	Post1	0.125	0.428068	1	-1.15237	1.40237
Based on estimated marginal means
*. The mean difference is significant at the .05 level.
b. Adjustment for multiple comparisons: Bonferroni.
Time x Virus: Pairwise Comparisons
Measure: OFT Bouts
Virus			Mean Difference (I-J)	Std. Error	Sig.b	95% Confidence Interval for Differenceb
						Lower Bound	Upper Bound
ChR2	Pre	Stim	-4.178*	0.955088	0.00248059	-7.0278	-1.32776
		Post1	0.733333	0.535819	1	-0.865574	2.33224
		Post2	0.45	0.464098	1	-0.934887	1.83489
	Stim	Pre	4.178*	0.955088	0.00248059	1.32776	7.0278
		Post1	4.911*	1.06111	0.00144098	1.7447	8.07752
		Post2	4.628*	1.2265	0.00910051	0.967839	8.28772
	Post1	Pre	-0.733333	0.535819	1	-2.33224	0.865574
		Stim	-4.911*	1.06111	0.00144098	-8.07752	-1.7447
		Post2	-0.283333	0.592073	1	-2.0501	1.48344
	Post2	Pre	-0.45	0.464098	1	-1.83489	0.934887
		Stim	-4.628*	1.2265	0.00910051	-8.28772	-0.967839
		Post1	0.283333	0.592073	1	-1.48344	2.0501
eYFP	Pre	Stim	0.433333	0.997557	1	-2.54342	3.41008
		Post1	0.2	0.559645	1	-1.47	1.87
		Post2	0.233333	0.484734	1	-1.21313	1.6798
	Stim	Pre	-0.433333	0.997557	1	-3.41008	2.54342
		Post1	-0.233333	1.1083	1	-3.54054	3.07387
		Post2	-0.2	1.28104	1	-4.02268	3.62268
	Post1	Pre	-0.2	0.559645	1	-1.87	1.47
		Stim	0.233333	1.1083	1	-3.07387	3.54054
		Post2	0.0333333	0.6184	1	-1.812	1.87866
	Post2	Pre	-0.233333	0.484734	1	-1.6798	1.21313
		Stim	0.2	1.28104	1	-3.62268	4.02268
		Post1	-0.0333333	0.6184	1	-1.87866	1.812
Based on estimated marginal means
*. The mean difference is significant at the .05 level.
b. Adjustment for multiple comparisons: Bonferroni.
Time x Virus: Pairwise Comparisons
Measure: OFT Bouts
Time			Mean Difference (I-J)	Std. Error	Sig.b	95% Confidence Interval for Differenceb
						Lower Bound	Upper Bound
Pre	ChR2	eYFP	-0.283333	0.487228	0.568521	-1.31129	0.744628
	eYFP	ChR2	0.283333	0.487228	0.568521	-0.744628	1.31129
Stim	ChR2	eYFP	4.328*	1.34554	0.00506569	1.48894	7.16662
	eYFP	ChR2	-4.328*	1.34554	0.00506569	-7.16662	-1.48894
Post1	ChR2	eYFP	-0.816667	0.615792	0.202315	-2.11587	0.48254
	eYFP	ChR2	0.816667	0.615792	0.202315	-0.48254	2.11587
Post2	ChR2	eYFP	-0.5	0.860878	0.568994	-2.31629	1.31629
	eYFP	ChR2	0.5	0.860878	0.568994	-1.31629	2.31629
Based on estimated marginal means
*. The mean difference is significant at the .05 level.
b. Adjustment for multiple comparisons: Bonferroni.

## Sheet: 3H Speed - Raw Data
MouseID	Model	Virus	Pre	Stim	Post	Post2
C1G3M2	6-OHDA	eYFP	0	0	3.39795	0
C2G1M3	6-OHDA	eYFP	3.11589	5.21105	4.18711	2.99815
C3G1-1M1	6-OHDA	eYFP	5.3935	2.42234	3.73895	4.05905
C3G1-1M3	6-OHDA	eYFP	5.15633	3.23212	3.48122	4.37203
C4G0M2	6-OHDA	eYFP	4.02555	3.49599	3.72589	4.26476
C2G2M1	6-OHDA	ChR2	4.48092	4.90999	4.42204	5.40622
C2G2M3	6-OHDA	ChR2	2.4659	10.9349	3.21774	0
C2G2M4	6-OHDA	ChR2	4.57743	10.3859	16.1355	0
C3G3M1	6-OHDA	ChR2	3.29854	5.86758	2.08179	2.24094
C3G3M2	6-OHDA	ChR2	4.73202	5.69427	5.45565	3.72131
C2G3M1	Saline	eYFP	6.41744	7.47799	7.72272	4.67279
C2G3M2	Saline	eYFP	5.71004	5.83731	5.28533	5.27947
C4G2M4	Saline	eYFP	6.44734	4.88792	5.2956	6.78363
C4G3M0	Saline	eYFP	5.30069	4.15712	5.40255	4.52415
C4G3M4	Saline	eYFP	5.49727	6.81134	7.14335	7.65768
C2G2_0M2	Saline	ChR2	7.50312	12.4106	6.0475	4.85859
C4G1M2	Saline	ChR2	6.03103	14.436	4.57373	4.664
C4G1M3	Saline	ChR2	5.48876	10.6634	4.8055	3.56779
C5G1M1	Saline	ChR2	5.94714	11.6601	4.54972	5.56337
C5G1M3	Saline	ChR2	5.53077	7.94278	5.99879	4.66023
C5G3M0	Saline	ChR2	5.8304	6.46182	4.41051	6.12995

## Sheet: 3H Speed - Stats
Three way MM ANOVA Results
Tests of Within-Subjects Effects
Measure: OFT Speed
Source		Type IV Sum of Squares	df	Mean Square	F	Sig.	Partial Eta Squared	Noncent. Parameter	Observed Powera
Time	Greenhouse-Geisser	79.4933	2.01514	39.448	6.4144	0.00422678	0.273951	12.9259	0.877356
Time * Model	Greenhouse-Geisser	17.0585	2.01514	8.46518	1.37647	0.266152	0.074904	2.77378	0.276646
Time * Virus	Greenhouse-Geisser	92.7759	2.01514	46.0394	7.48618	0.00196502	0.305731	15.0857	0.92365
Time * Model * Virus	Greenhouse-Geisser	12.863	2.01514	6.38317	1.03793	0.365528	0.0575415	2.09157	0.216943
Error(Time)	Greenhouse-Geisser	210.68	34.2574	6.14992
a. Computed using alpha = .05
Tests of Between-Subjects Effects
Measure: OFT Speed
Transformed Variable:
Source	Type IV Sum of Squares	df	Mean Square	F	Sig.	Partial Eta Squared	Noncent. Parameter	Observed Powera
Intercept	2276.08	1	2276.08	394.371	< 0.001	0.958675	394.371	1
Model	94.5015	1	94.5015	16.3741	< 0.001	0.490623	16.3741	0.967766
Virus	30.7472	1	30.7472	5.32751	0.0338325	0.238607	5.32751	0.585802
Model * Virus	4.68372	1	4.68372	0.811538	0.380251	0.0455625	0.811538	0.136147
Error	98.1139	17	5.77141
a. Computed using alpha = .05
Time: Pairwise Comparisons
Measure: OFT Speed
(I) Time		Mean Difference (I-J)	Std. Error	Sig.b	95% Confidence Interval for Differenceb
					Lower Bound	Upper Bound
Pre	Stim	-1.870*	0.543726	0.0187454	-3.49299	-0.247984
	Post1	-0.455999	0.617312	1	-2.29808	1.38609
	Post2	0.818904	0.302703	0.0900473	-0.0843744	1.72218
Stim	Pre	1.870*	0.543726	0.0187454	0.247984	3.49299
	Post1	1.41449	0.668323	0.296151	-0.579816	3.40879
	Post2	2.689*	0.719338	0.00980729	0.542854	4.83593
Post1	Pre	0.455999	0.617312	1	-1.38609	2.29808
	Stim	-1.41449	0.668323	0.296151	-3.40879	0.579816
	Post2	1.2749	0.801792	0.78146	-1.11768	3.66748
Post2	Pre	-0.818904	0.302703	0.0900473	-1.72218	0.0843744
	Stim	-2.689*	0.719338	0.00980729	-4.83593	-0.542854
	Post1	-1.2749	0.801792	0.78146	-3.66748	1.11768
Based on estimated marginal means
*. The mean difference is significant at the .05 level.
b. Adjustment for multiple comparisons: Bonferroni.
Time x Virus: Pairwise Comparisons
Measure: OFT Speed
Virus			Mean Difference (I-J)	Std. Error	Sig.b	95% Confidence Interval for Differenceb
						Lower Bound	Upper Bound
ChR2	Pre	Stim	-4.094*	0.752043	< 0.001	-6.33819	-1.84993
		Post1	-0.680337	0.853822	1	-3.22818	1.8675
		Post2	1.393*	0.418677	0.0239881	0.143224	2.64192
	Stim	Pre	4.094*	0.752043	< 0.001	1.84993	6.33819
		Post1	3.414*	0.924376	0.0108303	0.655346	6.1721
		Post2	5.487*	0.994937	< 0.001	2.5177	8.45557
	Post1	Pre	0.680337	0.853822	1	-1.8675	3.22818
		Stim	-3.414*	0.924376	0.0108303	-6.1721	-0.655346
		Post2	2.07291	1.10898	0.473534	-1.23634	5.38216
	Post2	Pre	-1.393*	0.418677	0.0239881	-2.64192	-0.143224
		Stim	-5.487*	0.994937	< 0.001	-8.45557	-2.5177
		Post1	-2.07291	1.10898	0.473534	-5.38216	1.23634
eYFP	Pre	Stim	0.353088	0.785483	1	-1.99083	2.697
		Post1	-0.231661	0.891788	1	-2.89279	2.42947
		Post2	0.245234	0.437294	1	-1.05967	1.55014
	Stim	Pre	-0.353088	0.785483	1	-2.697	1.99083
		Post1	-0.584749	0.965479	1	-3.46578	2.29628
		Post2	-0.107854	1.03918	1	-3.2088	2.9931
	Post1	Pre	0.231661	0.891788	1	-2.42947	2.89279
		Stim	0.584749	0.965479	1	-2.29628	3.46578
		Post2	0.476895	1.15829	1	-2.9795	3.93329
	Post2	Pre	-0.245234	0.437294	1	-1.55014	1.05967
		Stim	0.107854	1.03918	1	-2.9931	3.2088
		Post1	-0.476895	1.15829	1	-3.93329	2.9795
Based on estimated marginal means
*. The mean difference is significant at the .05 level.
b. Adjustment for multiple comparisons: Bonferroni.
Time x Virus: Pairwise Comparisons
Measure: OFT Speed
Time			Mean Difference (I-J)	Std. Error	Sig.b	95% Confidence Interval for Differenceb
						Lower Bound	Upper Bound
Pre	ChR2	eYFP	0.276676	0.549465	0.621049	-0.882594	1.43595
	eYFP	ChR2	-0.276676	0.549465	0.621049	-1.43595	0.882594
Stim	ChR2	eYFP	4.724*	1.05036	< 0.001	2.50775	6.9399
	eYFP	ChR2	-4.724*	1.05036	< 0.001	-6.9399	-2.50775
Post1	ChR2	eYFP	0.725352	1.24271	0.567098	-1.89655	3.34725
	eYFP	ChR2	-0.725352	1.24271	0.567098	-3.34725	1.89655
Post2	ChR2	eYFP	-0.870663	0.729374	0.248982	-2.40951	0.668181
	eYFP	ChR2	0.870663	0.729374	0.248982	-0.668181	2.40951
Based on estimated marginal means
*. The mean difference is significant at the .05 level.
b. Adjustment for multiple comparisons: Bonferroni.

## Sheet: 3I Duration - Raw Data
MouseID	Model	Virus	Pre	Stim	Post	Post2
C1G3M2	6-OHDA	ChR2	2.4	5.75333	4.65667	4.34333
C2G1M3	6-OHDA	ChR2	0	25.2	0	0
C3G1-1M1	6-OHDA	ChR2	2.31	21.5667	0.31	0
C3G1-1M3	6-OHDA	ChR2	1.92333	3.7	0	0.733333
C4G0M2	6-OHDA	ChR2	1.14333	10.72	1.83333	0.366667
C2G2M1	6-OHDA	eYFP	0	0	0	0
C2G2M3	6-OHDA	eYFP	0.79	2.54667	1.35667	1.9
C2G2M4	6-OHDA	eYFP	1.2	0	0.856667	1.4
C3G3M1	6-OHDA	eYFP	6.72333	3.56667	1.87667	4.83333
C3G3M2	6-OHDA	eYFP	2.72333	0.723333	1.9	1.15333
C2G3M1	Saline	eYFP	10.7433	6.32333	12.6233	11.8433
C2G3M2	Saline	eYFP	7.84333	7.86667	7.16667	6.27667
C4G2M4	Saline	eYFP	6.86667	5.46667	6.56667	7.82333
C4G3M0	Saline	eYFP	6.96667	3.83	6.31333	4.69
C4G3M4	Saline	eYFP	13.7333	16.2	16.01	12.9
C2G2_0M2	Saline	ChR2	12.2433	27.0667	2.53333	7.64667
C4G1M2	Saline	ChR2	10.6867	30.7233	1.25667	4.51333
C4G1M3	Saline	ChR2	5.16667	22.51	7.15333	0
C5G1M1	Saline	ChR2	7.60333	28.4333	7.15667	4.22333
C5G1M3	Saline	ChR2	7.96667	16.5133	10.11	14.4967
C5G3M0	Saline	ChR2	9.49	6	5.67667	11.8467

## Sheet: 3I Duration - Stats
Three way MM ANOVA Results
Tests of Within-Subjects Effects
Measure: OFT Duration
Source		Type IV Sum of Squares	df	Mean Square	F	Sig.	Partial Eta Squared	Noncent. Parameter	Observed Powera
Time	Greenhouse-Geisser	623.843	1.31911	472.927	10.8914	0.00163627	0.390494	14.367	0.934423
Time * Model	Greenhouse-Geisser	4.64636	1.31911	3.52235	0.0811191	0.844313	0.00474905	0.107005	0.0594337
Time * Virus	Greenhouse-Geisser	795.302	1.31911	602.908	13.8849	< 0.001	0.449569	18.3157	0.975463
Time * Model * Virus	Greenhouse-Geisser	26.8549	1.31911	20.3583	0.468849	0.552843	0.0268391	0.618463	0.106509
Error(Time)	Greenhouse-Geisser	973.732	22.4249	43.422
a. Computed using alpha = .05
Tests of Between-Subjects Effects
Measure: OFT Duration
Transformed Variable:
Source	Type IV Sum of Squares	df	Mean Square	F	Sig.	Partial Eta Squared	Noncent. Parameter	Observed Powera
Intercept	3473.94	1	3473.94	150.563	< 0.001	0.898546	150.563	1
Model	986.824	1	986.824	42.7697	< 0.001	0.715575	42.7697	0.999985
Virus	112.499	1	112.499	4.8758	0.0412597	0.222886	4.8758	0.548822
Model * Virus	2.53809	1	2.53809	0.110003	0.744195	0.00642915	0.110003	0.0613226
Error	392.24	17	23.073
a. Computed using alpha = .05
Time: Pairwise Comparisons
Measure: OFT Duration
(I) Time		Mean Difference (I-J)	Std. Error	Sig.b	95% Confidence Interval for Differenceb
					Lower Bound	Upper Bound
Pre	Stim	-5.659*	1.57492	0.0134582	-10.3582	-0.958961
	Post1	0.99775	0.72166	1	-1.15571	3.15121
	Post2	0.78975	0.656555	1	-1.16944	2.74894
Stim	Pre	5.659*	1.57492	0.0134582	0.958961	10.3582
	Post1	6.656*	1.7728	0.00947256	1.36621	11.9465
	Post2	6.448*	1.98731	0.0285922	0.518129	12.3785
Post1	Pre	-0.99775	0.72166	1	-3.15121	1.15571
	Stim	-6.656*	1.7728	0.00947256	-11.9465	-1.36621
	Post2	-0.208	0.673719	1	-2.21841	1.80241
Post2	Pre	-0.78975	0.656555	1	-2.74894	1.16944
	Stim	-6.448*	1.98731	0.0285922	-12.3785	-0.518129
	Post1	0.208	0.673719	1	-1.80241	2.21841
Based on estimated marginal means
*. The mean difference is significant at the .05 level.
b. Adjustment for multiple comparisons: Bonferroni.
Time x Virus: Pairwise Comparisons
Measure: OFT Duration
Virus			Mean Difference (I-J)	Std. Error	Sig.b	95% Confidence Interval for Differenceb
						Lower Bound	Upper Bound
ChR2	Pre	Stim	-12.424*	2.17831	< 0.001	-18.924	-5.92365
		Post1	1.7035	0.998148	0.636505	-1.27502	4.68202
		Post2	1.1025	0.9081	1	-1.60731	3.81231
	Stim	Pre	12.424*	2.17831	< 0.001	5.92365	18.924
		Post1	14.127*	2.45202	< 0.001	6.81042	21.4443
		Post2	13.526*	2.7487	< 0.001	5.3241	21.7286
	Post1	Pre	-1.7035	0.998148	0.636505	-4.68202	1.27502
		Stim	-14.127*	2.45202	< 0.001	-21.4443	-6.81042
		Post2	-0.601	0.93184	1	-3.38165	2.17965
	Post2	Pre	-1.1025	0.9081	1	-3.81231	1.60731
		Stim	-13.526*	2.7487	< 0.001	-21.7286	-5.3241
		Post1	0.601	0.93184	1	-2.17965	3.38165
eYFP	Pre	Stim	1.10667	2.27518	1	-5.68255	7.89588
		Post1	0.292	1.04253	1	-2.81896	3.40296
		Post2	0.477	0.94848	1	-2.3533	3.3073
	Stim	Pre	-1.10667	2.27518	1	-7.89588	5.68255
		Post1	-0.814667	2.56105	1	-8.45694	6.8276
		Post2	-0.629667	2.87092	1	-9.19662	7.93729
	Post1	Pre	-0.292	1.04253	1	-3.40296	2.81896
		Stim	0.814667	2.56105	1	-6.8276	8.45694
		Post2	0.185	0.973275	1	-2.71929	3.08929
	Post2	Pre	-0.477	0.94848	1	-3.3073	2.3533
		Stim	0.629667	2.87092	1	-7.93729	9.19662
		Post1	-0.185	0.973275	1	-3.08929	2.71929
Based on estimated marginal means
*. The mean difference is significant at the .05 level.
b. Adjustment for multiple comparisons: Bonferroni.
Time x Virus: Pairwise Comparisons
Measure: OFT Duration
Time			Mean Difference (I-J)	Std. Error	Sig.b	95% Confidence Interval for Differenceb
						Lower Bound	Upper Bound
Pre	ChR2	eYFP	-0.551611	1.05613	0.608203	-2.77984	1.67662
	eYFP	ChR2	0.551611	1.05613	0.608203	-1.67662	2.77984
Stim	ChR2	eYFP	12.979*	3.18428	< 0.001	6.26065	19.6971
	eYFP	ChR2	-12.979*	3.18428	< 0.001	-19.6971	-6.26065
Post1	ChR2	eYFP	-1.96311	1.29141	0.14686	-4.68775	0.761532
	eYFP	ChR2	1.96311	1.29141	0.14686	-0.761532	4.68775
Post2	ChR2	eYFP	-1.17711	1.57413	0.46481	-4.49824	2.14402
	eYFP	ChR2	1.17711	1.57413	0.46481	-2.14402	4.49824
Based on estimated marginal means
*. The mean difference is significant at the .05 level.
b. Adjustment for multiple comparisons: Bonferroni.

## Sheet: 3J Turn Angle Sum - Raw Data
MouseID	Model	Virus	Pre	Stim	Post	Post2
C1G3M2	6-OHDA	ChR2	285.423	1387.95	901.43	861.15
C2G1M3	6-OHDA	ChR2	268.08	1799.8	90.9333	206.367
C3G1-1M1	6-OHDA	ChR2	414.85	2195.33	101.173	598.817
C3G1-1M3	6-OHDA	ChR2	167.387	437.887	-2.80333	-6.93667
C4G0M2	6-OHDA	ChR2	11.13	1555.86	41.38	137.183
C2G2M1	6-OHDA	eYFP	-64.41	113.387	-119.653	59.1367
C2G2M3	6-OHDA	eYFP	222.2	749	706.82	412.13
C2G2M4	6-OHDA	eYFP	70.7933	-24.1533	458.723	61.9067
C3G3M1	6-OHDA	eYFP	675.04	382.493	234.283	503.39
C3G3M2	6-OHDA	eYFP	527.463	285.477	61.41	502.7
C2G3M1	Saline	eYFP	440.42	264.88	173.717	336.983
C2G3M2	Saline	eYFP	187.677	58.47	-167.36	34.8967
C4G2M4	Saline	eYFP	279.7	182.28	-97.7	-340.093
C4G3M0	Saline	eYFP	-303.067	85.5433	192.16	35.0067
C4G3M4	Saline	eYFP	-303.52	92.76	210.913	65.1433
C2G2_0M2	Saline	ChR2	-91.1367	120.503	-123.427	-443.083
C4G1M2	Saline	ChR2	-243.447	-527.433	127.387	-195.2
C4G1M3	Saline	ChR2	52.37	-811.897	76.09	78.3833
C5G1M1	Saline	ChR2	-165.887	-317.803	395.147	-98.7933
C5G1M3	Saline	ChR2	-221.12	-918.627	-17.03	-92.3567
C5G3M0	Saline	ChR2	-184.197	103.993	-88.1733	60.4267

## Sheet: 3J Turn Angle Sum - Stats
Three way MM ANOVA Results
Tests of Within-Subjects Effects
Measure: OFT Turn Angle Sum
Source		Type IV Sum of Squares	df	Mean Square	F	Sig.	Partial Eta Squared	Noncent. Parameter	Observed Powera
Time	Sphericity Assumed	960259	3	320086	4.19071	0.00999899	0.197762	12.5721	0.827891
Time * Model	Sphericity Assumed	2.17436e+06	3	724787	9.48922	< 0.001	0.358229	28.4677	0.995329
Time * Virus	Sphericity Assumed	623103	3	207701	2.71931	0.0540608	0.137901	8.15793	0.626445
Time * Model * Virus	Sphericity Assumed	2.55582e+06	3	851939	11.1539	< 0.001	0.396177	33.4618	0.99873
Error(Time)	Sphericity Assumed	3.89538e+06	51	76380
a. Computed using alpha = .05
Tests of Between-Subjects Effects
Measure: OFT Turn Angle Sum
Transformed Variable:
Source	Type IV Sum of Squares	df	Mean Square	F	Sig.	Partial Eta Squared	Noncent. Parameter	Observed Powera
Intercept	3.24035e+06	1	3.24035e+06	20.8881	< 0.001	0.55131	20.8881	0.990348
Model	4.60002e+06	1	4.60002e+06	29.6528	< 0.001	0.635606	29.6528	0.999206
Virus	20960.9	1	20960.9	0.135119	0.717719	0.00788548	0.135119	0.0639275
Model * Virus	1.30456e+06	1	1.30456e+06	8.40949	0.00996442	0.330959	8.40949	0.780252
Error	2.6372e+06	17	155129
a. Computed using alpha = .05
Time: Pairwise Comparisons
Measure: OFT Turn Angle Sum
(I) Time		Mean Difference (I-J)	Std. Error	Sig.a	95% Confidence Interval for Differencea
					Lower Bound	Upper Bound
Pre	Stim	-271.979	96.6888	0.071849	-560.502	16.5442
	Post1	-46.2884	82.9665	1	-293.864	201.287
	Post2	-36.2137	59.9751	1	-215.182	142.754
Stim	Pre	271.979	96.6888	0.071849	-16.5442	560.502
	Post1	225.691	107.802	0.309588	-95.9948	547.376
	Post2	235.765	95.6823	0.14818	-49.7547	521.285
Post1	Pre	46.2884	82.9665	1	-201.287	293.864
	Stim	-225.691	107.802	0.309588	-547.376	95.9948
	Post2	10.0747	57.5587	1	-161.683	181.832
Post2	Pre	36.2137	59.9751	1	-142.754	215.182
	Stim	-235.765	95.6823	0.14818	-521.285	49.7547
	Post1	-10.0747	57.5587	1	-181.832	161.683
Based on estimated marginal means
a. Adjustment for multiple comparisons: Bonferroni.
Time x Virus: Pairwise Comparisons
Measure: OFT Turn Angle Sum
Virus			Mean Difference (I-J)	Std. Error	Sig.b	95% Confidence Interval for Differenceb
						Lower Bound	Upper Bound
ChR2	Pre	Stim	-498.174*	133.733	0.0101003	-897.239	-99.1094
		Post1	-100.475	114.753	1	-442.904	241.953
		Post2	-78.5371	82.9532	1	-326.073	168.999
	Stim	Pre	498.174*	133.733	0.0101003	99.1094	897.239
		Post1	397.699	149.104	0.0974808	-47.2332	842.631
		Post2	419.637*	132.341	0.0335201	24.7262	814.548
	Post1	Pre	100.475	114.753	1	-241.953	442.904
		Stim	-397.699	149.104	0.0974808	-842.631	47.2332
		Post2	21.9381	79.611	1	-215.625	259.501
	Post2	Pre	78.5371	82.9532	1	-168.999	326.073
		Stim	-419.637*	132.341	0.0335201	-814.548	-24.7262
		Post1	-21.9381	79.611	1	-259.501	215.625
eYFP	Pre	Stim	-45.784	139.68	1	-462.593	371.025
		Post1	7.89833	119.856	1	-349.757	365.553
		Post2	6.10967	86.6418	1	-252.433	264.652
	Stim	Pre	45.784	139.68	1	-371.025	462.593
		Post1	53.6823	155.734	1	-411.034	518.399
		Post2	51.8937	138.226	1	-360.577	464.365
	Post1	Pre	-7.89833	119.856	1	-365.553	349.757
		Stim	-53.6823	155.734	1	-518.399	411.034
		Post2	-1.78867	83.151	1	-249.915	246.337
	Post2	Pre	-6.10967	86.6418	1	-264.652	252.433
		Stim	-51.8937	138.226	1	-464.365	360.577
		Post1	1.78867	83.151	1	-246.337	249.915
Based on estimated marginal means
*. The mean difference is significant at the .05 level.
b. Adjustment for multiple comparisons: Bonferroni.
Time x Virus: Pairwise Comparisons
Measure: OFT Turn Angle Sum
Time			Mean Difference (I-J)	Std. Error	Sig.a	95% Confidence Interval for Differencea
						Lower Bound	Upper Bound
Pre	ChR2	eYFP	-129.661	106.492	0.240023	-354.34	95.0185
	eYFP	ChR2	129.661	106.492	0.240023	-95.0185	354.34
Stim	ChR2	eYFP	322.729	186.285	0.101296	-70.2981	715.757
	eYFP	ChR2	-322.729	186.285	0.101296	-715.757	70.2981
Post1	ChR2	eYFP	-21.2872	121.43	0.862912	-277.482	234.908
	eYFP	ChR2	21.2872	121.43	0.862912	-234.908	277.482
Post2	ChR2	eYFP	-45.0139	113.418	0.696389	-284.304	194.276
	eYFP	ChR2	45.0139	113.418	0.696389	-194.276	284.304
Based on estimated marginal means
a. Adjustment for multiple comparisons: Bonferroni.
Time x Model: Pairwise Comparisons
Measure: OFT Turn Angle Sum
Model			Mean Difference (I-J)	Std. Error	Sig.b	95% Confidence Interval for Differenceb
						Lower Bound	Upper Bound
6-OHDA	Pre	Stim	-630.506*	139.68	0.00183883	-1047.32	-213.697
		Post1	10.426	119.856	1	-347.229	368.081
		Post2	-75.7887	86.6418	1	-334.331	182.754
	Stim	Pre	630.506*	139.68	0.00183883	213.697	1047.32
		Post1	640.932*	155.734	0.00433206	176.216	1105.65
		Post2	554.718*	138.226	0.00540717	142.247	967.189
	Post1	Pre	-10.426	119.856	1	-368.081	347.229
		Stim	-640.932*	155.734	0.00433206	-1105.65	-176.216
		Post2	-86.2147	83.151	1	-334.341	161.911
	Post2	Pre	75.7887	86.6418	1	-182.754	334.331
		Stim	-554.718*	138.226	0.00540717	-967.189	-142.247
		Post1	86.2147	83.151	1	-161.911	334.341
Saline	Pre	Stim	86.5482	133.733	1	-312.516	485.613
		Post1	-103.003	114.753	1	-445.431	239.426
		Post2	3.36122	82.9532	1	-244.175	250.897
	Stim	Pre	-86.5482	133.733	1	-485.613	312.516
		Post1	-189.551	149.104	1	-634.483	255.381
		Post2	-83.187	132.341	1	-478.098	311.724
	Post1	Pre	103.003	114.753	1	-239.426	445.431
		Stim	189.551	149.104	1	-255.381	634.483
		Post2	106.364	79.611	1	-131.199	343.927
	Post2	Pre	-3.36122	82.9532	1	-250.897	244.175
		Stim	83.187	132.341	1	-311.724	478.098
		Post1	-106.364	79.611	1	-343.927	131.199
Based on estimated marginal means
*. The mean difference is significant at the .05 level.
b. Adjustment for multiple comparisons: Bonferroni.
Time x Model: Pairwise Comparisons
Measure: OFT Turn Angle Sum
Time			Mean Difference (I-J)	Std. Error	Sig.b	95% Confidence Interval for Differenceb
						Lower Bound	Upper Bound
Pre	6-OHDA	Saline	298.793*	106.492	0.0121569	74.1135	523.472
	Saline	6-OHDA	-298.793*	106.492	0.0121569	-523.472	-74.1135
Stim	6-OHDA	Saline	1015.847*	186.285	< 0.001	622.82	1408.87
	Saline	6-OHDA	-1015.847*	186.285	< 0.001	-1408.87	-622.82
Post1	6-OHDA	Saline	185.364	121.43	0.145274	-70.8313	441.559
	Saline	6-OHDA	-185.364	121.43	0.145274	-441.559	70.8313
Post2	6-OHDA	Saline	377.943*	113.418	0.003945	138.652	617.233
	Saline	6-OHDA	-377.943*	113.418	0.003945	-617.233	-138.652
Based on estimated marginal means
*. The mean difference is significant at the .05 level.
b. Adjustment for multiple comparisons: Bonferroni.
Time x Model x Virus: Pairwise Comparisons
Measure: OFT Turn Angle Sum
Model				Mean Difference (I-J)	Std. Error	Sig.b	95% Confidence Interval for Differenceb
							Lower Bound	Upper Bound
6-OHDA	ChR2	Pre	Stim	-1245.989*	197.537	< 0.001	-1835.45	-656.532
			Post1	2.95133	169.502	1	-502.849	508.752
			Post2	-129.942	122.53	1	-495.577	235.693
		Stim	Pre	1245.989*	197.537	< 0.001	656.532	1835.45
			Post1	1248.941*	220.241	< 0.001	591.732	1906.15
			Post2	1116.047*	195.48	< 0.001	532.725	1699.37
		Post1	Pre	-2.95133	169.502	1	-508.752	502.849
			Stim	-1248.941*	220.241	< 0.001	-1906.15	-591.732
			Post2	-132.893	117.593	1	-483.797	218.01
		Post2	Pre	129.942	122.53	1	-235.693	495.577
			Stim	-1116.047*	195.48	< 0.001	-1699.37	-532.725
			Post1	132.893	117.593	1	-218.01	483.797
	eYFP	Pre	Stim	-15.0233	197.537	1	-604.481	574.434
			Post1	17.9007	169.502	1	-487.9	523.701
			Post2	-21.6353	122.53	1	-387.27	343.999
		Stim	Pre	15.0233	197.537	1	-574.434	604.481
			Post1	32.924	220.241	1	-624.284	690.132
			Post2	-6.612	195.48	1	-589.934	576.71
		Post1	Pre	-17.9007	169.502	1	-523.701	487.9
			Stim	-32.924	220.241	1	-690.132	624.284
			Post2	-39.536	117.593	1	-390.439	311.367
		Post2	Pre	21.6353	122.53	1	-343.999	387.27
			Stim	6.612	195.48	1	-576.71	589.934
			Post1	39.536	117.593	1	-311.367	390.439
Saline	ChR2	Pre	Stim	249.641	180.325	1	-288.458	787.74
			Post1	-203.902	154.733	1	-665.632	257.829
			Post2	-27.1322	111.854	1	-360.909	306.645
		Stim	Pre	-249.641	180.325	1	-787.74	288.458
			Post1	-453.543	201.052	0.225269	-1053.49	146.404
			Post2	-276.773	178.448	0.835909	-809.271	255.724
		Post1	Pre	203.902	154.733	1	-257.829	665.632
			Stim	453.543	201.052	0.225269	-146.404	1053.49
			Post2	176.769	107.347	0.70787	-143.56	497.099
		Post2	Pre	27.1322	111.854	1	-306.645	360.909
			Stim	276.773	178.448	0.835909	-255.724	809.271
			Post1	-176.769	107.347	0.70787	-497.099	143.56
	eYFP	Pre	Stim	-76.5447	197.537	1	-666.002	512.913
			Post1	-2.104	169.502	1	-507.904	503.696
			Post2	33.8547	122.53	1	-331.78	399.489
		Stim	Pre	76.5447	197.537	1	-512.913	666.002
			Post1	74.4407	220.241	1	-582.768	731.649
			Post2	110.399	195.48	1	-472.923	693.721
		Post1	Pre	2.104	169.502	1	-503.696	507.904
			Stim	-74.4407	220.241	1	-731.649	582.768
			Post2	35.9587	117.593	1	-314.945	386.862
		Post2	Pre	-33.8547	122.53	1	-399.489	331.78
			Stim	-110.399	195.48	1	-693.721	472.923
			Post1	-35.9587	117.593	1	-386.862	314.945
Based on estimated marginal means
*. The mean difference is significant at the .05 level.
b. Adjustment for multiple comparisons: Bonferroni.
Time x Model x Virus: Pairwise Comparisons
Measure: OFT Turn Angle Sum
Time				Mean Difference (I-J)	Std. Error	Sig.b	95% Confidence Interval for Differenceb
							Lower Bound	Upper Bound
Pre	ChR2	6-OHDA	Saline	371.610*	147.293	0.021894	60.85	682.37
		Saline	6-OHDA	-371.610*	147.293	0.021894	-682.37	-60.85
	eYFP	6-OHDA	Saline	225.975	153.842	0.160127	-98.603	550.554
		Saline	6-OHDA	-225.975	153.842	0.160127	-550.554	98.603
Stim	ChR2	6-OHDA	Saline	1867.241*	257.656	1.36461e-06	1323.63	2410.85
		Saline	6-OHDA	-1867.241*	257.656	1.36461e-06	-2410.85	-1323.63
	eYFP	6-OHDA	Saline	164.454	269.113	0.549221	-403.325	732.233
		Saline	6-OHDA	-164.454	269.113	0.549221	-732.233	403.325
Post1	ChR2	6-OHDA	Saline	164.757	167.953	0.340363	-189.594	519.108
		Saline	6-OHDA	-164.757	167.953	0.340363	-519.108	189.594
	eYFP	6-OHDA	Saline	205.971	175.422	0.256523	-164.137	576.078
		Saline	6-OHDA	-205.971	175.422	0.256523	-576.078	164.137
Post2	ChR2	6-OHDA	Saline	474.420*	156.871	0.00764836	143.451	805.389
		Saline	6-OHDA	-474.420*	156.871	0.00764836	-805.389	-143.451
	eYFP	6-OHDA	Saline	281.465	163.847	0.103981	-64.2208	627.151
		Saline	6-OHDA	-281.465	163.847	0.103981	-627.151	64.2208
Based on estimated marginal means
*. The mean difference is significant at the .05 level.
b. Adjustment for multiple comparisons: Bonferroni.
Time x Model x Virus: Pairwise Comparisons
Measure: OFT Turn Angle Sum
Time				Mean Difference (I-J)	Std. Error	Sig.b	95% Confidence Interval for Differenceb
							Lower Bound	Upper Bound
Pre	6-OHDA	ChR2	eYFP	-56.8433	153.842	0.716324	-381.422	267.735
		eYFP	ChR2	56.8433	153.842	0.716324	-267.735	381.422
	Saline	ChR2	eYFP	-202.478	147.293	0.187085	-513.238	108.282
		eYFP	ChR2	202.478	147.293	0.187085	-108.282	513.238
Stim	6-OHDA	ChR2	eYFP	1174.123*	269.113	< 0.001	606.343	1741.9
		eYFP	ChR2	-1174.123*	269.113	< 0.001	-1741.9	-606.343
	Saline	ChR2	eYFP	-528.664	257.656	0.0559195	-1072.27	14.9435
		eYFP	ChR2	528.664	257.656	0.0559195	-14.9435	1072.27
Post1	6-OHDA	ChR2	eYFP	-41.894	175.422	0.814101	-412.001	328.213
		eYFP	ChR2	41.894	175.422	0.814101	-328.213	412.001
	Saline	ChR2	eYFP	-0.680444	167.953	0.996815	-355.031	353.67
		eYFP	ChR2	0.680444	167.953	0.996815	-353.67	355.031
Post2	6-OHDA	ChR2	eYFP	51.4633	163.847	0.757271	-294.223	397.149
		eYFP	ChR2	-51.4633	163.847	0.757271	-397.149	294.223
	Saline	ChR2	eYFP	-141.491	156.871	0.379681	-472.461	189.478
		eYFP	ChR2	141.491	156.871	0.379681	-189.478	472.461
Based on estimated marginal means
*. The mean difference is significant at the .05 level.
b. Adjustment for multiple comparisons: Bonferroni.
Model x Virus: Pairwise Comparisons
Measure: OFT Turn Angle Sum	OFT_Box_TAS
Virus			Mean Difference (I-J)	Std. Error	Sig.b	95% Confidence Interval for Differenceb
						Lower Bound	Upper Bound
ChR2	6-OHDA	Saline	719.507*	119.248	< 0.001	467.915	971.099
	Saline	6-OHDA	-719.507*	119.248	< 0.001	-971.099	-467.915
eYFP	6-OHDA	Saline	219.466	124.551	0.0960293	-43.3132	482.246
	Saline	6-OHDA	-219.466	124.551	0.0960293	-482.246	43.3132
Based on estimated marginal means
*. The mean difference is significant at the .05 level.
b. Adjustment for multiple comparisons: Bonferroni.
Model x Virus: Pairwise Comparisons
Measure: OFT Turn Angle Sum	OFT_Box_TAS
Model			Mean Difference (I-J)	Std. Error	Sig.b	95% Confidence Interval for Differenceb
						Lower Bound	Upper Bound
6-OHDA	ChR2	eYFP	281.712*	124.551	0.0371026	18.9326	544.492
	eYFP	ChR2	-281.712*	124.551	0.0371026	-544.492	-18.9326
Saline	ChR2	eYFP	-218.328	119.248	0.084706	-469.921	33.2638
	eYFP	ChR2	218.328	119.248	0.084706	-33.2638	469.921
Based on estimated marginal means
*. The mean difference is significant at the .05 level.
b. Adjustment for multiple comparisons: Bonferroni.

[truncated: 4 more sheets: 3L Release to Base - Raw Data, 3L Release to Base - Stats, 3M Turn to Base - Raw Data, 3M Turn to Base - Stats]
