# Supplementary material for: Restoration of locomotor function following stimulation of the A13 region in Parkinson’s mouse models
Source: eLife. 2025 Sep 23;12:RP90832. doi: 10.7554/eLife.90832 (PMC12456956; doi:10.7554/eLife.90832)
Supplement: Figure 4—source data 1. [file elife-90832-fig4-data1.xlsx]

## Sheet: 4G Data
	Saline			6-OHDA
Region	M1	M2	M3	M1	M2	M3	M4	M5	M6
ZI+A13	-12.03	-27.24	-19.32	-26	-7.69	-25.76	-86.27	-70.68	-43.35
VTA	-3.97	-24.13	-8.27	17.84	-24.75	-52.54	-28.72	-35.7	-47.3
SN	-27.6	-15.76	-24.38	-58.31	-73.69	-82.81	-66.35	-74.27	-76.46

## Sheet: 4G Stats
Compare row means (main row effect)
Number of families	1
Number of comparisons per family	3
Alpha	0.05
Bonferroni's multiple comparisons test	Predicted (LS) Mean diff.	95.00% CI of diff.	Below threshold?	Summary	Adjusted P Value
ZI+A13 vs. VTA	-2.398	-21.51 to 16.71	No	ns	>0.9999
ZI+A13 vs. SN	24.56	5.447 to 43.67	Yes	*	0.0115
VTA vs. SN	26.96	8.746 to 45.16	Yes	**	0.0043
Test details	Predicted (LS) Mean 1	Predicted (LS) Mean 2	Predicted (LS) Mean diff.	SE of diff.	N1	N2	t	DF
ZI+A13 vs. VTA	-22.72	-20.33	-2.398	6.875	7	9	0.3488	12
ZI+A13 vs. SN	-22.72	-47.28	24.56	6.875	7	9	3.572	12
VTA vs. SN	-20.33	-47.28	26.96	6.551	9	9	4.115	12
