# Supplementary material for: Restoration of locomotor function following stimulation of the A13 region in Parkinson’s mouse models
Source: eLife. 2025 Sep 23;12:RP90832. doi: 10.7554/eLife.90832 (PMC12456956; doi:10.7554/eLife.90832)
Supplement: Figure 5—figure supplement 1—source data 1. [file elife-90832-fig5-figsupp1-data1.xlsx]

## Sheet: Supplementary Figure 5-source d
	Brain A	Brain A	Brain B	Brain B	Brain C	Brain C	Brain D	Brain D	Brain E	Brain E	Brain A	Brain A	Brain B	Brain B	Brain C	Brain C	Brain D	Brain D	Brain E	Brain E
	SEI	SEC	SEI	SEC	PEI	PEC	PEI	PEC	PEI	PEC	SAI	SAC	SAI	SAC	PAI	PAC	PAI	PAC	PAI	PAC
FRP	0	0	0	0	0	0	0	0	0	0	0	0	0	0	0	0	0	0	0	0
MOp	5188592	1523656	7915477	770573	622784	703793	2563794	464273	6487594	4810237	1141	1112	1373	326	68	62	568	439	628	848
MOs	5648548	2302915	9586897	945425	1096697	827069	2727887	479180	7769771	5754123	2716	1631	3369	1055	267	342	2258	853	2180	2323
SSp	11838915	3107480	16632969	2358869	1012377	2043732	3923293	1335320	14203452	10102599	1578	1648	1326	951	110	104	390	668	471	1266
SSs	2290711	557948	3130608	354939	101164	451782	450502	222264	2478336	2078592	631	524	499	159	24	71	99	279	188	461
ILA	525640	500642	1019606	347927	537979	324623	399834	97914	1178906	858199	446	361	753	652	274	354	756	494	380	240
GU	1496620	418354	1475871	110710	115595	273237	284029	56583	1555538	1412697	307	427	344	77	29	87	126	103	262	439
VISC	841917	220159	1070588	90085	37228	224501	186474	57518	915770	812540	217	128	241	63	7	52	86	86	151	359
AUD	1714823	837658	2506374	203721	263508	210629	608807	176554	1723010	1043654	572	384	564	160	146	204	464	217	180	475
VISal	756219	344410	1041341	88371	186311	12647	204121	23705	993443	258061	55	22	72	22	66	44	63	23	46	73
VISam	481478	165058	590211	69109	105771	15552	146457	22980	719932	204321	188	39	357	37	75	16	245	11	18	33
VISl	391788	142620	419003	10068	66434	1945	58005	2660	443668	98879	20	6	6	6	4	0	31	33	2	5
VISli	0	0	0	0	0	0	0	0	0	0	0	0	0	0	0	0	0	0	0	0
VISp	2563070	768510	1837548	121323	310529	37809	383329	36200	2421918	347975	30	43	32	39	39	6	108	28	35	69
VISpl	288656	71826	207545	3638	26566	1358	29164	766	201209	14642	4	1	0	7	6	0	43	1	1	0
VISpm	398616	111743	154959	7675	46783	11349	33168	7156	236385	43335	3	3	19	1	1	1	59	4	5	1
VISpor	0	0	0	0	0	0	0	0	0	0	0	0	0	0	0	0	0	0	0	0
ACA	1779708	1299061	3140824	1023083	840800	440988	947855	393239	2650478	1980347	1412	836	1962	1233	396	256	2339	814	781	613
PL	1641734	803989	1575794	219795	663075	233916	494023	120891	1483892	1029770	639	489	1073	602	327	258	848	395	598	436
ORB	2774646	1366830	4680033	391007	1618505	702432	1222974	266076	5046611	2735749	1699	1053	1991	1216	256	775	1252	701	1626	1437
AI	6724667	1387326	4551337	316150	607441	909259	1032651	192095	5239348	3395403	1653	1488	1097	427	131	480	601	470	1432	1738
RSP	1134179	453569	1263564	628175	408432	110586	414806	179436	1457608	570510	769	125	1457	191	670	137	900	159	242	149
TEa	1333969	582543	1941029	63113	458256	103488	548769	36592	1533301	782889	389	294	395	225	196	234	450	160	234	438
PERI	589107	425427	871688	48323	368414	80233	386135	39708	1106942	766440	179	147	90	224	52	37	321	170	115	278
ECT	1244063	671233	1604192	55335	804190	108342	799762	32382	2021222	957453	450	364	332	247	296	251	501	245	250	431
MOB	39794	7193	90426	22470	44666	28750	77597	11582	171159	54539	0	0	7	11	1	0	3	6	46	11
AOB	0	0	1607	100	1720	2037	0	0	6640	1247	0	0	0	0	0	0	0	0	0	0
AON	610418	169143	821809	123895	130105	289547	304692	112545	1458815	821720	37	16	54	23	3	5	25	66	8	14
TTd	309586	174384	736130	178289	144282	98967	231055	70256	762620	378706	114	48	386	237	15	27	108	189	51	54
TTv	69749	31120	36763	8299	8311	17035	30927	7824	157099	63018	3	0	0	0	0	2	3	0	1	0
DP	107699	60342	127834	44059	55618	50449	88805	22009	148990	109046	72	45	124	105	18	53	110	128	27	22
PIR	4334892	1031098	3821143	323241	579140	830754	1162762	312279	4097605	2462089	1154	500	1410	990	80	114	389	918	467	2089
NLOT	78876	21947	129382	15203	3579	21005	19267	37903	105428	86130	77	29	32	11	4	5	24	28	6	41
COA	365919	39989	487880	62296	34372	24184	59657	41587	350382	280968	163	50	103	76	19	12	53	42	33	185
PAA	76986	4017	114981	9104	6456	9373	6260	3037	18908	26641	7	0	38	15	0	0	4	4	0	7
TR	281854	22911	144281	10318	161050	1000	64834	7628	334537	17366	96	21	120	107	111	10	92	25	174	108
CA1	355175	247970	697489	457658	282583	59163	642312	242581	1004627	462627	637	650	560	543	474	41	412	340	301	439
CA2	31991	29139	60261	67833	3046	2301	47203	17132	54562	37934	24	11	54	79	41	1	49	17	14	15
CA3	201024	122501	686707	499079	19077	37407	330256	148522	358833	204932	172	78	220	152	24	2	157	104	81	128
DG	147533	93245	820641	529591	168937	92497	735860	398520	670046	476421	121	123	68	53	38	11	332	91	113	73
FC	3693	3261	3331	11247	4201	3475	12093	3452	16461	10083	0	0	0	0	0	0	6	0	0	2
IG	2346	4632	4622	10493	1009	112	2114	1420	8792	10247	1	0	1	7	1	0	9	0	2	0
ENT	2616423	946467	3669214	162775	3671788	99635	2855546	65814	5976131	953268	709	458	719	417	501	53	1116	451	656	890
PAR	65005	51389	65645	8148	104833	7421	89193	2415	198921	28139	42	20	7	3	9	7	60	15	25	21
POST	110214	93404	176717	23167	116017	9095	92725	51425	229202	68107	40	4	104	5	20	2	92	14	16	13
PRE	187856	97908	201866	59293	201996	28843	220486	52618	364790	48274	29	11	26	5	14	0	82	44	14	7
ProS	0	0	0	0	0	0	0	0	0	0	0	0	0	0	0	0	0	0	0	0
SUB	619803	201941	983016	242747	906580	25381	620192	105424	2174643	634305	753	534	821	477	534	113	635	426	591	613
APr	0	0	0	0	0	0	0	0	0	0	0	0	0	0	0	0	0	0	0	0
CLA	945147	539824	949333	186659	211535	375201	307330	87357	882038	847701	78	48	38	38	0	2	20	60	7	47
EP	1652817	727678	1614885	166069	394916	694473	676060	208921	2209118	1796163	451	195	486	265	127	28	183	372	176	835
LA	219366	80915	371256	44796	25192	87903	90533	46792	358417	280892	52	18	98	20	2	10	25	20	11	45
BLAa	502426	286865	694007	41180	30266	124048	190353	42467	699093	602127	121	47	1160	75	2	12	73	92	244	297
BLAp	124277	10587	131794	15356	23016	32341	26038	11121	253822	166736	94	34	530	117	50	15	14	30	67	83
BLAv	80512	7119	110991	1761	2200	6970	6606	2390	27062	35288	41	7	382	24	0	7	3	10	7	26
BMA	430708	74894	485448	29245	7152	41444	28505	24085	244526	218560	136	74	415	130	8	17	61	79	25	290
PA	22460	8936	162578	39420	6830	4068	25412	7730	143077	46647	7	2	25	10	15	1	10	1	21	64
CP	6061297	5549820	15928581	2865536	2833114	2373901	4184930	1583639	11989649	12864511	18	44	107	79	1	0	44	54	53	225
ACB	2792755	1702420	2956559	731516	1010139	1313558	1211773	644464	3629632	2985704	35	15	70	56	6	1	54	58	198	482
FS	251020	167148	219624	51265	126891	176872	109335	65580	289849	226124	20	6	28	4	1	1	18	31	102	145
OT	1200819	344719	611816	90805	115834	155469	118965	75691	1328941	967170	3	4	12	32	1	0	11	14	18	82
LSX	325433	318636	1150416	1232237	287341	91045	393430	248625	924119	526674	1	2	64	107	0	1	19	42	26	27
AAA	296732	89585	360222	77002	32086	92880	107529	92637	252169	235971	127	28	90	46	4	15	36	96	88	239
BA	32944	10201	37373	6277	495	611	8544	7102	21006	15962	11	1	1	2	0	0	0	7	0	1
CEAc	221395	65357	295082	32140	10227	69193	100698	34593	257667	210347	90	14	69	7	0	4	11	41	56	224
CEAl	38169	10795	46070	12836	1540	11524	20675	7898	66248	52044	1	0	3	2	0	0	0	9	0	14
CEAm	232064	88121	231201	62578	24405	98820	105800	58530	327172	278260	184	24	77	25	0	3	7	91	66	394
IA	76542	21944	130304	14519	11811	21856	31327	11579	77195	54736	22	2	68	11	0	0	4	11	38	87
MEA	647344	192973	972600	201028	59794	134568	254575	151399	700488	509334	122	32	155	36	2	4	47	144	62	323
PALd	444893	233067	930584	152841	297330	146342	379627	60498	795168	664470	12	0	10	1	0	0	2	4	3	27
PALv	1512588	696094	2089736	636453	695266	565679	979731	325365	1864180	1454649	101	119	425	301	6	10	190	479	257	628
PALm	533392	206447	748207	402223	210924	167470	298727	93367	514828	268344	6	3	6	9	0	0	28	24	24	25
PALc	245017	142444	646136	350155	65796	79602	158791	163645	339304	308674	45	23	64	29	2	0	22	74	27	112
VAL	34608	45897	87717	48633	45753	22721	109292	2914	183989	205681	6	0	154	0	0	0	10	0	2	0
VM	25242	86122	113017	115343	87225	66235	154222	15244	176121	185625	67	1	275	2	4	1	27	1	25	6
VP	74951	14543	479349	49086	47691	6479	100029	6435	216978	78422	0	0	0	0	0	0	1	0	78	45
SPA	381	479	2092	3477	1501	906	3846	126	7025	6920	0	0	0	0	0	0	0	0	0	0
SPF	33867	16083	57817	36952	34724	19440	38146	8996	104590	52641	12	1	0	1	9	1	10	2	6	4
PP	37183	21408	37733	22828	10216	1879	8196	3221	99830	35247	0	1	3	0	4	0	3	0	1	0
MG	28132	18682	124469	48688	41682	4751	31782	27745	174530	65556	4	0	2	9	7	4	1	0	0	1
LGd	0	0	0	0	0	0	0	0	0	0	0	0	0	0	0	0	0	0	0	0
LAT	46284	25455	391043	135400	7786	3240	95258	15181	120609	99595	4	0	2	1	6	1	0	0	3	6
AV	8077	3684	40370	46766	2963	10363	10506	3628	39200	19584	0	0	40	0	0	0	3	0	3	0
AM	11609	15241	71168	111634	13780	5356	39396	10211	97147	57136	2	0	73	0	0	0	6	0	18	0
AD	9435	8044	47887	51501	19076	26645	13871	7611	59257	49352	0	0	0	0	0	0	0	0	0	4
IAM	1	390	5365	11933	1379	1062	577	48	576	338	0	0	0	0	0	0	0	0	3	4
IAD	431	1117	9267	21347	2656	1787	3023	968	14427	5489	0	0	0	0	0	0	9	0	3	0
LD	79431	33714	268284	54641	5333	6402	32074	6520	73064	41031	0	0	2	0	0	0	3	0	0	1
IMD	5357	2570	7754	6486	3887	2381	3678	1596	54605	37747	0	0	3	0	0	0	0	0	0	0
MD	86936	59826	191593	195849	75110	15703	107814	9886	263739	170533	47	0	110	2	0	0	39	3	8	3
SMT	3424	14835	44760	25124	43674	33591	74024	4048	90841	25944	69	0	110	0	10	0	19	0	30	0
PR	4870	1344	10650	4838	9364	11387	9150	775	12641	6044	9	0	30	0	0	0	1	0	5	0
MTN	90033	76414	290615	343420	622824	388770	346385	81072	562321	361080	10	0	37	3	2	0	84	3	105	11
ILM	49265	58932	156964	194058	101264	67735	129608	14373	249039	208572	36	3	86	1	7	0	59	2	58	37
RT	162385	39135	541089	91515	121498	31166	222758	14651	249588	167661	1	0	29	0	0	0	3	1	33	43
IGL	3514	1014	26041	5168	2867	4	3545	997	16713	3985	0	0	1	0	2	0	0	0	0	0
LGv	0	0	0	0	0	0	0	0	0	0	0	0	0	0	0	0	0	0	0	0
SubG	1027	3594	6689	4929	2	0	847	272	6809	1785	0	0	0	0	0	0	0	0	0	0
EPI	0	0	0	0	0	0	0	0	0	0	0	0	0	0	0	0	0	0	0	0
SO	9020	958	24148	10366	2308	2879	5781	3856	3793	2904	2	0	0	0	0	0	0	1	0	0
ASO	0	0	0	0	0	0	0	0	0	0	0	0	0	0	0	0	0	0	0	0
PVHam	0	0	0	0	0	0	0	0	0	0	0	0	0	0	0	0	0	0	0	0
PVHmm	160	334	179	508	5333	2632	5514	1023	6300	5422	0	0	1	2	0	0	0	0	0	0
PVHpm	1796	1331	6262	5307	25159	21664	19056	8625	17784	21823	0	0	0	4	0	0	7	0	9	0
PVHp	12774	12380	35936	36948	243109	126970	66430	26854	98988	108360	0	1	3	7	7	0	15	1	17	6
PVa	507	59	364	215	87	334	4061	352	4282	6136	0	0	0	0	0	0	0	0	0	0
PVi	14832	6878	19796	9802	37215	19445	55574	24853	43547	25182	0	0	0	0	0	0	0	0	0	0
ARH	11724	7447	7714	1253	9895	12812	3865	511	21016	8793	0	0	0	0	0	0	6	6	0	3
ADP	3966	2246	11555	13492	1813	108	1970	783	4315	2101	0	0	0	1	0	0	1	0	1	0
AHA	0	0	0	0	0	0	0	0	0	0	0	0	0	0	0	0	0	0	0	0
AVP	51148	20532	89153	37904	8360	2249	23660	5522	31276	13742	0	0	0	0	0	0	8	5	9	2
AVPV	19606	5261	23379	8715	1799	1433	6810	2438	32570	16364	0	0	0	0	2	0	20	4	8	2
DMH	153148	54984	226982	166215	201871	209451	208657	41265	248786	252738	13	8	14	34	6	1	15	1	36	5
MEPO	8270	9046	15067	18251	35697	6876	14062	7749	27407	15693	10	3	1	1	5	1	20	18	7	3
MPO	379276	123381	633969	318293	66757	22390	255564	102788	515878	304536	6	10	28	15	9	1	54	11	37	33
OV	1310	316	286	361	373	155	903	579	740	95	0	0	0	0	0	0	3	5	0	0
PD	825	226	372	1248	112	280	601	572	1503	1234	0	0	0	0	0	0	0	0	0	0
PS	8277	3733	18025	9874	1583	364	5687	2724	10867	6813	0	0	0	0	0	0	0	0	0	3
PSCH	0	0	0	0	0	0	0	0	0	0	0	0	0	0	0	0	0	0	0	0
PVp	14976	1771	2584	5375	12506	10997	5699	2702	55090	34253	0	1	0	2	0	0	0	1	3	3
PVpo	4366	1042	8577	1547	2816	1682	7462	2526	36141	24907	0	0	3	0	0	0	6	1	5	2
SBPV	48759	18428	49937	37071	33458	22144	68907	12258	100979	30268	0	2	0	4	0	0	4	4	4	0
SCH	25050	2994	18838	10094	4959	2111	3370	535	43028	24796	0	0	0	1	0	0	1	0	5	0
SFO	1152	840	112	1	316	43	1060	393	3263	2743	0	0	0	0	0	0	0	0	0	0
VLPO	21174	6664	13224	5659	1334	751	4104	4153	6370	6906	0	0	0	0	0	0	1	1	0	1
AHN	359957	145013	767056	518913	194559	42132	419182	154976	694875	420815	6	4	18	23	0	0	40	28	38	109
MBO	171392	85073	250091	158101	78802	48655	286750	67540	381394	428272	13	1	118	22	37	4	83	10	18	45
LM	12137	8276	12837	4674	2981	554	1007	1374	16483	11562	0	0	0	0	1	0	0	0	1	2
MM	83983	35726	87912	54848	28032	17959	74600	29857	136069	185700	3	1	8	5	6	1	29	3	3	34
SUM	60610	36357	137570	88223	44246	23133	209331	34068	217059	216641	10	0	110	16	30	3	54	7	12	7
TM	14662	4714	11772	10356	3543	7009	1812	2241	11783	14369	0	0	0	1	0	0	0	0	2	2
MPN	57196	18917	118827	47502	15989	3095	39943	9652	145537	78186	4	1	13	39	4	5	33	8	10	2
PMd	46303	23227	75466	61711	9020	3141	17500	6110	76382	69013	3	2	14	2	6	1	2	1	1	5
PMv	23778	11346	30294	23439	1466	2995	1528	1484	53198	37212	5	1	41	17	6	9	25	7	0	3
PVHd	15153	7468	46263	35626	13683	12233	19491	9313	28919	33079	3	0	33	6	0	0	4	0	7	4
VMH	364191	65332	181854	64023	45347	53735	98749	30413	191137	51119	3	6	3	10	15	1	63	39	27	8
PH	109601	38890	302494	280613	274577	179370	332998	89480	556515	481002	56	5	83	24	55	22	193	22	48	14
LPO	569976	228110	828591	482775	79514	70226	268077	150259	428974	278688	7	7	26	19	0	1	29	22	20	59
LHA	1279435	655507	2551361	1648902	630593	401314	1129665	645053	1646254	1582253	95	39	172	64	46	30	151	137	231	232
PST	0	0	2749	3007	1073	142	1935	1905	1863	4260	0	0	2	0	0	0	0	0	0	0
PSTN	4587	5504	15644	9854	4124	5482	4956	4279	12473	13402	7	9	7	6	30	2	3	1	4	18
RCH	103948	27951	121802	52532	4440	6033	25640	8201	31871	43562	0	0	0	0	0	0	5	1	2	0
STN	7539	5956	38953	40360	5444	4373	17814	5551	30866	15492	2	0	2	4	7	8	9	6	4	3
TU	213123	35423	79546	42719	8106	10621	14132	12444	55899	63339	1	0	0	0	0	0	3	3	1	4
ZI	18669	14692	23857	36314	20472	15977	29291	11159	19793	21141	25	1	31	4	0	0	23	0	7	5
A13	18268	11763	18966	22425	18937	15977	27805	10898	16991	16978	25	1	31	4	0	0	23	0	7	5
ME	0	0	0	0	1154	1102	211	140	824	205	0	0	0	0	0	0	0	0	0	0
SCs	443896	245869	707252	470968	81577	42674	630838	338376	308707	152853	1	4	1	4	1	3	118	40	52	33
IC	573399	166123	613887	159680	77929	6188	400135	81466	420164	102355	14	14	36	12	21	1	31	17	25	30
NB	21198	7639	90860	37855	13306	4122	28959	3236	107439	45875	10	0	5	0	3	0	6	1	2	1
SAG	38237	4810	74996	12868	3526	103	22098	3120	21376	11053	0	0	0	1	1	0	2	0	1	6
PBG	28626	9828	33356	8017	8132	4192	10782	2688	7892	5480	0	0	0	3	0	0	0	1	0	0
MEV	4810	4694	8256	6808	1608	392	733	566	13741	2685	0	1	0	2	13	14	0	0	0	9
SNr	81287	43296	116968	48563	72883	27264	137470	77010	218060	130602	53	24	182	94	87	2	345	35	49	44
VTA	141624	137380	205586	174061	70908	21537	116423	35343	540146	355728	19	15	36	26	59	13	75	18	19	10
RR	56563	25070	173206	53453	24148	3532	72409	16628	140629	48917	5	3	25	6	8	6	20	8	8	18
MRN	340548	350220	1128696	781008	126979	14724	436937	102357	1140931	290298	31	22	38	35	59	12	59	31	79	88
SCm	1018855	734116	2193252	1293012	286580	63124	868766	324292	2207671	967021	57	22	28	43	33	12	58	15	146	100
PAG	463702	412991	814728	962643	109785	48553	577642	105938	1696701	976860	31	61	60	83	131	67	172	54	113	135
APN	9325	18716	162537	68271	4257	396	65025	27011	84079	57178	0	0	2	0	1	0	0	0	0	1
MPT	10710	4318	17267	36877	4383	5864	14460	4582	86525	57750	0	0	0	0	0	0	1	0	0	0
NOT	6506	4977	50247	34225	2529	486	58021	30537	41688	36425	0	0	1	0	0	0	0	0	1	1
NPC	0	0	32095	71431	1694	3247	13744	918	138280	104302	0	0	0	0	0	0	0	0	0	0
OP	3738	2922	35917	23756	4382	14657	11420	5990	40652	25084	0	0	7	0	0	0	0	0	1	2
PPT	1101	476	14742	19168	475	373	3919	6	23469	17208	0	0	0	1	0	0	0	0	0	0
CUN	15827	26692	37208	16769	5685	253	32310	5888	72874	6183	0	0	0	1	1	0	5	3	6	3
RN	12566	30327	48174	40145	10952	622	6769	911	63626	17142	10	2	36	31	1	0	12	1	14	5
III	3751	826	4150	3125	0	126	1605	191	1406	2239	0	0	0	0	0	0	2	0	0	4
EW	991	318	3721	4511	2	21	5050	1576	4780	7030	0	0	2	0	0	2	2	1	0	1
IV	2512	291	2951	2099	55	119	889	0	288	101	0	0	0	0	0	0	0	0	0	0
VTN	16462	2698	3396	1416	9	0	10609	261	1178	2000	0	0	0	0	0	0	0	0	0	0
AT	4823	700	7698	4857	5	0	142	0	2058	962	0	0	0	0	0	0	0	0	0	0
LT	129	964	3143	2693	415	0	528	264	12254	1758	0	0	0	0	0	0	0	0	0	0
DT	0	0	0	0	0	0	0	0	0	0	0	0	0	0	0	0	0	0	0	0
MT	0	0	0	0	0	0	0	0	0	0	0	0	0	0	0	0	0	0	0	0
SNI	0	0	0	0	0	0	0	0	0	0	0	0	0	0	0	0	0	0	0	0
SNc	66649	45716	108829	41575	53785	6874	63646	18745	151347	66873	8	9	36	26	42	4	29	6	23	20
PPN	80428	44868	118569	21696	8603	342	45531	5889	78686	9692	3	1	24	6	65	11	16	2	17	12
IF	6081	3506	2608	1034	1184	450	4434	3133	12011	11429	5	5	0	0	0	0	9	3	0	1
IPN	81664	46992	82595	39531	23141	19836	82385	29029	182611	150253	15	7	1	0	1	2	54	8	1	1
RL	4845	1487	2278	915	533	176	2664	3382	4985	10847	1	1	2	0	0	0	3	0	0	1
CLI	5812	1933	3737	3188	128	94	5858	4117	9919	7235	1	0	0	0	0	0	13	1	0	0
DR	13142	7802	18313	26041	317	373	13658	5982	1537	4261	0	0	3	0	0	1	49	61	6	13
NLL	154463	15610	214461	13186	22011	8629	128059	29171	139574	61491	46	9	116	12	136	31	62	5	67	35
PSV	16699	5637	1705	1745	5190	943	13395	11792	15411	3296	0	0	6	1	0	0	2	0	1	2
PB	32682	11306	3166	343	1933	349	42982	6598	28003	6765	5	4	2	0	3	4	27	15	18	17
SOC	110550	17704	54929	3117	21796	2072	101135	39992	176390	28680	1	5	3	2	2	0	2	2	17	5
B	0	0	0	0	0	0	0	0	0	0	0	0	0	0	0	0	0	0	0	0
DTN	0	0	0	0	0	0	0	0	0	0	0	0	0	0	0	0	0	0	0	0
LTN	0	0	0	0	0	0	0	0	0	0	0	0	0	0	0	0	0	0	0	0
PCG	0	0	0	0	0	0	0	0	0	0	0	0	0	0	0	0	0	0	0	0
PG	57450	41053	194164	39542	20494	4230	55912	14005	69926	33124	3	3	12	18	0	1	2	0	17	5
PRNv	0	0	0	0	0	0	0	0	0	0	0	0	0	0	0	0	0	0	0	0
PRNc	250933	117627	0	0	120686	15170	140660	47317	55034	12973	6	13	0	0	7	1	40	47	22	30
SG	0	0	0	0	0	0	0	0	0	0	0	0	0	0	0	0	0	0	0	0
SSN	0	0	0	0	0	0	0	0	0	0	0	0	0	0	0	0	0	0	0	0
SUT	1210	207	0	0	314	41	3586	418	1062	98	0	0	0	0	0	0	0	0	0	0
TRN	293957	91068	429036	139199	115141	17553	205160	32079	196175	79158	4	6	17	13	0	0	45	7	14	45
V	7771	3684	1185	0	2183	644	10592	2433	1361	953	0	4	0	1	0	0	15	17	0	26
CS	155705	54450	140041	65966	11380	2946	62663	16984	67330	139713	0	0	4	0	2	0	28	38	3	4
LC	0	0	0	0	0	0	0	0	0	0	0	0	0	0	0	0	0	0	0	0
LDT	0	0	0	0	0	0	0	0	0	0	0	0	0	0	0	0	0	0	0	0
NI	0	0	0	0	0	0	0	0	0	0	0	0	0	0	0	0	0	0	0	0
PRNr	1481265	732142	1619931	466511	454335	41645	522509	114387	775917	219101	43	70	100	93	18	9	113	186	138	95
RPO	327	354	0	0	0	0	173	178	122	425	0	0	0	0	0	0	0	1	0	0
SLC	0	0	0	0	0	0	0	0	0	0	0	0	0	0	0	0	0	0	0	0
SLD	0	0	0	0	0	0	0	0	0	0	0	0	0	0	0	0	0	0	0	0
AP	0	0	0	0	0	0	0	0	0	0	0	0	0	0	0	0	0	0	0	0
CN	185	492	0	0	168	56	800	680	352	433	0	0	0	0	0	0	0	0	0	0
DCN	0	0	0	0	0	0	0	0	0	0	0	0	0	0	0	0	0	0	0	0
ECU	0	0	0	0	0	0	0	0	0	0	0	0	0	0	0	0	0	0	0	0
NTB	56695	15719	40264	12505	10255	4401	39533	11980	71036	25378	15	41	136	133	21	0	24	6	17	8
NTS	0	0	0	0	0	0	0	0	0	0	0	0	0	0	0	0	0	0	0	0
SPVC	0	0	0	0	0	0	0	0	0	0	0	0	0	0	0	0	0	0	0	0
SPVI	0	0	0	0	0	0	0	0	0	0	0	0	0	0	0	0	0	0	0	0
SPVO	0	0	0	0	0	0	0	0	0	0	0	0	0	0	0	0	0	0	0	0
z	0	0	0	0	0	0	0	0	0	0	0	0	0	0	0	0	0	0	0	0
VI	0	0	0	0	0	0	0	0	0	0	0	0	0	0	0	0	0	0	0	0
VII	0	0	0	0	0	0	0	0	0	0	0	0	0	0	0	0	0	0	0	0
ACVI	0	0	0	0	0	0	0	0	0	0	0	0	0	0	0	0	0	0	0	0
ACVII	0	0	0	0	0	0	0	0	0	0	0	0	0	0	0	0	0	0	0	0
EV	0	0	0	0	0	0	0	0	0	0	0	0	0	0	0	0	0	0	0	0
AMB	0	0	0	0	0	0	0	0	0	0	0	0	0	0	0	0	0	0	0	0
DMX	0	0	0	0	0	0	0	0	0	0	0	0	0	0	0	0	0	0	0	0
ECO	0	0	0	0	0	0	0	0	0	0	0	0	0	0	0	0	0	0	0	0
GRN	0	0	0	0	0	0	0	0	0	0	0	0	0	0	0	0	0	0	0	0
ICB	0	0	0	0	0	0	0	0	0	0	0	0	0	0	0	0	0	0	0	0
IO	0	0	0	0	0	0	0	0	0	0	0	0	0	0	0	0	0	0	0	0
IRN	0	0	0	0	0	0	0	0	0	0	0	0	0	0	0	0	0	0	0	0
ISN	0	0	0	0	0	0	0	0	0	0	0	0	0	0	0	0	0	0	0	0
LIN	0	0	0	0	0	0	0	0	0	0	0	0	0	0	0	0	0	0	0	0
LRN	0	0	0	0	0	0	0	0	0	0	0	0	0	0	0	0	0	0	0	0
MARN	0	0	0	0	0	0	0	0	0	0	0	0	0	0	0	0	0	0	0	0
MDRN	0	0	0	0	0	0	0	0	0	0	0	0	0	0	0	0	0	0	0	0
PARN	0	0	0	0	0	0	0	0	0	0	0	0	0	0	0	0	0	0	0	0
PAS	0	0	0	0	0	0	0	0	0	0	0	0	0	0	0	0	0	0	0	0
PGRN	0	0	0	0	0	0	0	0	0	0	0	0	0	0	0	0	0	0	0	0
PHY	0	0	0	0	0	0	0	0	0	0	0	0	0	0	0	0	0	0	0	0
PMR	0	0	0	0	0	0	0	0	0	0	0	0	0	0	0	0	0	0	0	0
PPY	0	0	0	0	0	0	0	0	0	0	0	0	0	0	0	0	0	0	0	0
VNC	0	0	0	0	0	0	0	0	0	0	0	0	0	0	0	0	0	0	0	0
x	0	0	0	0	0	0	0	0	0	0	0	0	0	0	0	0	0	0	0	0
XII	0	0	0	0	0	0	0	0	0	0	0	0	0	0	0	0	0	0	0	0
y	0	0	0	0	0	0	0	0	0	0	0	0	0	0	0	0	0	0	0	0
LINGgr	0	0	0	0	0	0	0	0	0	0	0	0	0	0	0	0	0	0	0	0
CENT	0	0	0	0	0	0	0	0	0	0	0	0	0	0	0	0	0	0	0	0
CUL	4036	10915	229	506	26869	2630	5379	6346	19869	2419	0	1	0	0	2	0	0	0	0	0
DEC	0	0	0	0	0	0	0	0	0	0	0	0	0	0	0	0	0	0	0	0
FOTU	0	0	0	0	0	0	0	0	0	0	0	0	0	0	0	0	0	0	0	0
PYR	0	0	0	0	0	0	0	0	0	0	0	0	0	0	0	0	0	0	0	0
UVU	0	0	0	0	0	0	0	0	0	0	0	0	0	0	0	0	0	0	0	0
NOD	0	0	0	0	0	0	0	0	0	0	0	0	0	0	0	0	0	0	0	0
SIM	0	0	0	0	0	0	0	0	0	0	0	0	0	0	0	0	0	0	0	0
AN	0	0	0	0	0	0	0	0	0	0	0	0	0	0	0	0	0	0	0	0
PRM	0	0	0	0	0	0	0	0	0	0	0	0	0	0	0	0	0	0	0	0
COPY	0	0	0	0	0	0	0	0	0	0	0	0	0	0	0	0	0	0	0	0
PFL	0	0	0	0	0	0	0	0	84	3636	0	0	0	0	0	0	0	0	0	0
FL	557	1719	537	272	13451	3156	23838	9341	20561	5726	0	0	0	0	1	0	0	0	0	0
FN	0	0	0	0	0	0	0	0	0	0	0	0	0	0	0	0	0	0	0	0
IP	0	0	0	0	0	0	0	0	0	0	0	0	0	0	0	0	0	0	0	0
DN	0	0	0	0	0	0	0	0	0	0	0	0	0	0	0	0	0	0	0	0
