# Supplementary material for: Restoration of locomotor function following stimulation of the A13 region in Parkinson’s mouse models
Source: eLife. 2025 Sep 23;12:RP90832. doi: 10.7554/eLife.90832 (PMC12456956; doi:10.7554/eLife.90832)
Supplement: Figure 5—source data 1. [file elife-90832-fig5-data1.xlsx]

## Sheet: 5C Sham Afferents
	MOp	MOs	SSp	PALd	VM	LHA	STN	ZI	SNr	MRN	SCm	PAG	CUN	RN	SNc	PPN	TRN	PRNr
MOp	1	0.818182	0.890909	0.428247	0.328771	0.354545	0.194625	0.275241	0.432803	0.259682	0.300684	0.136364	0.317837	-0.250417	0.331829	0.599556	0.369021	0.372727
MOs	0.818182	1	0.527273	0.0455582	0.456626	0	-0.0389249	0.504608	0.697041	0.0546698	-0.0683373	-0.218182	-0.06742	0.192629	0.299568	0.389025	-0.00911164	0.109091
SSp	0.890909	0.527273	1	0.451026	0.0502288	0.318182	0.194625	0	0.0956722	0.0820048	0.300684	0.118182	0.298574	-0.577886	0.0645223	0.398179	0.323463	0.281818
PALd	0.428247	0.0455582	0.451026	1	0.434784	0.924832	0.565699	0.291961	0.0844749	0.678082	0.835616	0.569478	0.781925	-0.400616	0.579715	0.619273	0.881279	0.660594
VM	0.328771	0.456626	0.0502288	0.434784	1	0.45206	0.175964	0.926277	0.528606	0.318079	0.228834	-0.0639276	0.140295	0.140295	0.439834	0.347127	0.30206	0.0228313
LHA	0.354545	0	0.318182	0.924832	0.45206	1	0.739574	0.298178	0.0592257	0.833715	0.924832	0.736364	0.828303	-0.231154	0.622179	0.700245	0.947611	0.690909
STN	0.194625	-0.0389249	0.194625	0.565699	0.175964	0.739574	1	0.196419	0.0195069	0.624219	0.819288	0.622799	0.536111	-0.164957	0.276268	0.391931	0.604713	0.350325
ZI	0.275241	0.504608	0	0.291961	0.926277	0.298178	0.196419	1	0.52415	0.14713	0.140233	-0.229367	-0.0729015	0.170103	0.26977	0.200924	0.0988529	-0.091747
SNr	0.432803	0.697041	0.0956722	0.0844749	0.528606	0.0592257	0.0195069	0.52415	1	0.114155	-0.0844749	-0.127563	-0.0772271	0.405442	0.642075	0.339453	0.10274	0.0911164
MRN	0.259682	0.0546698	0.0820048	0.678082	0.318079	0.833715	0.624219	0.14713	0.114155	1	0.865297	0.874718	0.907419	0.139974	0.695196	0.830284	0.86758	0.783601
SCm	0.300684	-0.0683373	0.300684	0.835616	0.228834	0.924832	0.819288	0.140233	-0.0844749	0.865297	1	0.833715	0.888112	-0.231681	0.466544	0.711017	0.874429	0.706152
PAG	0.136364	-0.218182	0.118182	0.569478	-0.0639276	0.736364	0.622799	-0.229367	-0.127563	0.874718	0.833715	1	0.87646	-0.105946	0.51157	0.713976	0.833715	0.763636
CUN	0.317837	-0.06742	0.298574	0.781925	0.140295	0.828303	0.536111	-0.0729015	-0.0772271	0.907419	0.888112	0.87646	1	-0.153061	0.561517	0.795218	0.888112	0.789777
RN	-0.250417	0.192629	-0.577886	-0.400616	0.140295	-0.231154	-0.164957	0.170103	0.405442	0.139974	-0.231681	-0.105946	-0.153061	1	0.327145	0.13092	-0.173761	0.0385257
SNc	0.331829	0.299568	0.0645223	0.579715	0.439834	0.622179	0.276268	0.26977	0.642075	0.695196	0.466544	0.51157	0.561517	0.327145	1	0.730876	0.746008	0.72818
PPN	0.599556	0.389025	0.398179	0.619273	0.347127	0.700245	0.391931	0.200924	0.339453	0.830284	0.711017	0.713976	0.795218	0.13092	0.730876	1	0.79588	0.819241
TRN	0.369021	-0.00911164	0.323463	0.881279	0.30206	0.947611	0.604713	0.0988529	0.10274	0.86758	0.874429	0.833715	0.888112	-0.173761	0.746008	0.79588	1	0.838271
PRNr	0.372727	0.109091	0.281818	0.660594	0.0228313	0.690909	0.350325	-0.091747	0.0911164	0.783601	0.706152	0.763636	0.789777	0.0385257	0.72818	0.819241	0.838271	1

## Sheet: 5D 6-OHDA Afferents
	MOp	MOs	SSp	PALd	VM	LHA	STN	ZI	SNr	MRN	SCm	PAG	CUN	RN	SNc	PPN	TRN	PRNr
MOp	1	0.771429	0.828571	0.92582	0.428571	0.898645	-0.782691	0.758971	0.347863	0.257143	0.257143	-0.428571	0.617213	0.597614	0.142857	-0.542857	0.927634	0.463817
MOs	0.771429	1	0.428571	0.648074	0.542857	0.637748	-0.40584	0.880406	0.231908	-0.0285714	0.0857143	-0.2	0.524631	0.597614	0.0857143	-0.257143	0.898645	0.20292
SSp	0.828571	0.428571	1	0.92582	-0.0857143	0.695725	-0.753702	0.333947	0.0579771	-0.0285714	-0.142857	-0.657143	0.308607	0.119523	-0.257143	-0.828571	0.695725	0.637748
PALd	0.92582	0.648074	0.92582	1	0.092582	0.876714	-0.876714	0.557452	0.0313112	0.0308607	0.0617213	-0.678935	0.433333	0.322749	-0.216025	-0.802377	0.814092	0.563602
VM	0.428571	0.542857	-0.0857143	0.092582	1	0.434828	-0.144943	0.819689	0.840668	0.485714	0.657143	0.257143	0.802377	0.956183	0.828571	0.371429	0.550782	0.0579771
LHA	0.898645	0.637748	0.695725	0.876714	0.434828	1	-0.941176	0.739249	0.279412	0.289886	0.492805	-0.579771	0.704502	0.666973	0.115954	-0.579771	0.794118	0.514706
STN	-0.782691	-0.40584	-0.753702	-0.876714	-0.144943	-0.941176	1	-0.492833	-0.0735294	-0.173931	-0.376851	0.753702	-0.547946	-0.424437	0.115954	0.753702	-0.617647	-0.602941
ZI	0.758971	0.880406	0.333947	0.557452	0.819689	0.739249	-0.492833	1	0.585239	0.151794	0.394665	-0.212512	0.852574	0.889001	0.394665	-0.151794	0.89326	0.369625
SNr	0.347863	0.231908	0.0579771	0.0313112	0.840668	0.279412	-0.0735294	0.585239	1	0.434828	0.463817	0.20292	0.78278	0.788241	0.840668	0.289886	0.441176	0.294118
MRN	0.257143	-0.0285714	-0.0285714	0.0308607	0.485714	0.289886	-0.173931	0.151794	0.434828	1	0.828571	0.485714	0.185164	0.478091	0.771429	0.428571	0.0289886	-0.40584
SCm	0.257143	0.0857143	-0.142857	0.0617213	0.657143	0.492805	-0.376851	0.394665	0.463817	0.828571	1	0.2	0.493771	0.717137	0.714286	0.314286	0.115954	-0.173931
PAG	-0.428571	-0.2	-0.657143	-0.678935	0.257143	-0.579771	0.753702	-0.212512	0.20292	0.485714	0.2	1	-0.339467	0	0.6	0.942857	-0.40584	-0.840668
CUN	0.617213	0.524631	0.308607	0.433333	0.802377	0.704502	-0.547946	0.852574	0.78278	0.185164	0.493771	-0.339467	1	0.903696	0.493771	-0.185164	0.720158	0.626224
RN	0.597614	0.597614	0.119523	0.322749	0.956183	0.666973	-0.424437	0.889001	0.788241	0.478091	0.717137	0	0.903696	1	0.717137	0.119523	0.666973	0.242536
SNc	0.142857	0.0857143	-0.257143	-0.216025	0.828571	0.115954	0.115954	0.394665	0.840668	0.771429	0.714286	0.6	0.493771	0.717137	1	0.657143	0.144943	-0.231908
PPN	-0.542857	-0.257143	-0.828571	-0.802377	0.371429	-0.579771	0.753702	-0.151794	0.289886	0.428571	0.314286	0.942857	-0.185164	0.119523	0.657143	1	-0.463817	-0.753702
TRN	0.927634	0.898645	0.695725	0.814092	0.550782	0.794118	-0.617647	0.89326	0.441176	0.0289886	0.115954	-0.40584	0.720158	0.666973	0.144943	-0.463817	1	0.529412
PRNr	0.463817	0.20292	0.637748	0.563602	0.0579771	0.514706	-0.602941	0.369625	0.294118	-0.40584	-0.173931	-0.840668	0.626224	0.242536	-0.231908	-0.753702	0.529412	1

## Sheet: 5E Sham Efferents
	MOp	MOs	SSp	PALd	VM	LHA	STN	ZI	SNr	MRN	SCm	PAG	CUN	RN	SNc	PPN	TRN	PRNr
MOp	1	1	1	1	-0.105409	0.4	0.105409	-0.316228	1	0.2	0.4	-0.2	0.632456	-0.258199	1	1	0.8	0.8
MOs	1	1	1	1	-0.105409	0.4	0.105409	-0.316228	1	0.2	0.4	-0.2	0.632456	-0.258199	1	1	0.8	0.8
SSp	1	1	1	1	-0.105409	0.4	0.105409	-0.316228	1	0.2	0.4	-0.2	0.632456	-0.258199	1	1	0.8	0.8
PALd	1	1	1	1	-0.105409	0.4	0.105409	-0.316228	1	0.2	0.4	-0.2	0.632456	-0.258199	1	1	0.8	0.8
VM	-0.105409	-0.105409	-0.105409	-0.105409	1	0.737865	0.777778	0.5	-0.105409	0.948683	0.737865	0.737865	0.388889	0.816497	-0.105409	-0.105409	0.210819	-0.632456
LHA	0.4	0.4	0.4	0.4	0.737865	1	0.948683	0.632456	0.4	0.8	1	0.8	0.316228	0.258199	0.4	0.4	0.8	0
STN	0.105409	0.105409	0.105409	0.105409	0.777778	0.948683	1	0.833333	0.105409	0.737865	0.948683	0.948683	0.0555556	0.272166	0.105409	0.105409	0.632456	-0.210819
ZI	-0.316228	-0.316228	-0.316228	-0.316228	0.5	0.632456	0.833333	1	-0.316228	0.316228	0.632456	0.948683	-0.5	0	-0.316228	-0.316228	0.316228	-0.316228
SNr	1	1	1	1	-0.105409	0.4	0.105409	-0.316228	1	0.2	0.4	-0.2	0.632456	-0.258199	1	1	0.8	0.8
MRN	0.2	0.2	0.2	0.2	0.948683	0.8	0.737865	0.316228	0.2	1	0.8	0.6	0.632456	0.774597	0.2	0.2	0.4	-0.4
SCm	0.4	0.4	0.4	0.4	0.737865	1	0.948683	0.632456	0.4	0.8	1	0.8	0.316228	0.258199	0.4	0.4	0.8	0
PAG	-0.2	-0.2	-0.2	-0.2	0.737865	0.8	0.948683	0.948683	-0.2	0.6	0.8	1	-0.210819	0.258199	-0.2	-0.2	0.4	-0.4
CUN	0.632456	0.632456	0.632456	0.632456	0.388889	0.316228	0.0555556	-0.5	0.632456	0.632456	0.316228	-0.210819	1	0.544331	0.632456	0.632456	0.316228	0.105409
RN	-0.258199	-0.258199	-0.258199	-0.258199	0.816497	0.258199	0.272166	0	-0.258199	0.774597	0.258199	0.258199	0.544331	1	-0.258199	-0.258199	-0.258199	-0.774597
SNc	1	1	1	1	-0.105409	0.4	0.105409	-0.316228	1	0.2	0.4	-0.2	0.632456	-0.258199	1	1	0.8	0.8
PPN	1	1	1	1	-0.105409	0.4	0.105409	-0.316228	1	0.2	0.4	-0.2	0.632456	-0.258199	1	1	0.8	0.8
TRN	0.8	0.8	0.8	0.8	0.210819	0.8	0.632456	0.316228	0.8	0.4	0.8	0.4	0.316228	-0.258199	0.8	0.8	1	0.6
PRNr	0.8	0.8	0.8	0.8	-0.632456	0	-0.210819	-0.316228	0.8	-0.4	0	-0.4	0.105409	-0.774597	0.8	0.8	0.6	1

## Sheet: 5F 6-OHDA Efferents
	MOp	MOs	SSp	PALd	VM	LHA	STN	ZI	SNr	MRN	SCm	PAG	CUN	RN	SNc	PPN	TRN	PRNr
MOp	1	0.942857	0.885714	0.657143	0.428571	-0.0285714	0.845154	-0.058849	0.142857	0.542857	0.542857	0.828571	0.500216	0.358569	0.231908	0.637748	0.347863	0.142857
MOs	0.942857	1	0.771429	0.828571	0.485714	0.0857143	0.845154	0.0294245	0.371429	0.714286	0.714286	0.942857	0.617914	0.597614	0.521794	0.811679	0.550782	0.428571
SSp	0.885714	0.771429	1	0.314286	-0.0285714	-0.314286	0.777542	-0.441367	-0.0857143	0.428571	0.428571	0.714286	0.441367	0.239046	-0.0289886	0.492805	0.115954	-0.0857143
PALd	0.657143	0.828571	0.314286	1	0.771429	0.485714	0.676123	0.500216	0.657143	0.771429	0.771429	0.771429	0.647339	0.717137	0.840668	0.840668	0.811679	0.771429
VM	0.428571	0.485714	-0.0285714	0.771429	1	0.6	0.338062	0.794461	0.428571	0.314286	0.314286	0.314286	0.235396	0.239046	0.492805	0.376851	0.521794	0.428571
LHA	-0.0285714	0.0857143	-0.314286	0.485714	0.6	1	0.338062	0.912159	0.828571	0.542857	0.542857	0.142857	0.58849	0	0.579771	0.463817	0.782691	0.657143
STN	0.845154	0.845154	0.777542	0.676123	0.338062	0.338062	1	0.139262	0.507093	0.845154	0.845154	0.845154	0.870388	0.353553	0.445896	0.857493	0.685994	0.43948
ZI	-0.058849	0.0294245	-0.441367	0.500216	0.794461	0.912159	0.139262	1	0.617914	0.294245	0.294245	-0.0294245	0.30303	0	0.492592	0.25376	0.612008	0.529641
SNr	0.142857	0.371429	-0.0857143	0.657143	0.428571	0.828571	0.507093	0.617914	1	0.828571	0.828571	0.542857	0.794461	0.358569	0.840668	0.782691	0.927634	0.885714
MRN	0.542857	0.714286	0.428571	0.771429	0.314286	0.542857	0.845154	0.294245	0.828571	1	1	0.828571	0.971008	0.597614	0.811679	0.985611	0.927634	0.828571
SCm	0.542857	0.714286	0.428571	0.771429	0.314286	0.542857	0.845154	0.294245	0.828571	1	1	0.828571	0.971008	0.597614	0.811679	0.985611	0.927634	0.828571
PAG	0.828571	0.942857	0.714286	0.771429	0.314286	0.142857	0.845154	-0.0294245	0.542857	0.828571	0.828571	1	0.735612	0.597614	0.60876	0.898645	0.637748	0.542857
CUN	0.500216	0.617914	0.441367	0.647339	0.235396	0.58849	0.870388	0.30303	0.794461	0.971008	0.971008	0.735612	1	0.43082	0.686644	0.925476	0.895622	0.735612
RN	0.358569	0.597614	0.239046	0.717137	0.239046	0	0.353553	0	0.358569	0.597614	0.597614	0.597614	0.43082	1	0.788241	0.666973	0.545705	0.717137
SNc	0.231908	0.521794	-0.0289886	0.840668	0.492805	0.579771	0.445896	0.492592	0.840668	0.811679	0.811679	0.60876	0.686644	0.788241	1	0.823529	0.897059	0.985611
PPN	0.637748	0.811679	0.492805	0.840668	0.376851	0.463817	0.857493	0.25376	0.782691	0.985611	0.985611	0.898645	0.925476	0.666973	0.823529	1	0.897059	0.811679
TRN	0.347863	0.550782	0.115954	0.811679	0.521794	0.782691	0.685994	0.612008	0.927634	0.927634	0.927634	0.637748	0.895622	0.545705	0.897059	0.897059	1	0.927634
PRNr	0.142857	0.428571	-0.0857143	0.771429	0.428571	0.657143	0.43948	0.529641	0.885714	0.828571	0.828571	0.542857	0.735612	0.717137	0.985611	0.811679	0.927634	1
