# Supplementary material for: Restoration of locomotor function following stimulation of the A13 region in Parkinson’s mouse models
Source: eLife. 2025 Sep 23;12:RP90832. doi: 10.7554/eLife.90832 (PMC12456956; doi:10.7554/eLife.90832)
Supplement: Figure 6—source data 1. [file elife-90832-fig6-data1.xlsx]

## Sheet: Afferents
	Sham Afferent Contra			6-OHDA Afferent Contra			Sham Afferent Ipsi			6-OHDA Afferent Contra
PRNr	0.19	0.22		0.08	0.58	0.25	0.12	0.23		0.16	0.36	0.36
TRN	0.02	0.03		0	0.02	0.12	0.01	0.04		0	0.14	0.04
PPN	0	0.01		0.1	0.01	0.03	0.01	0.06		0.58	0.05	0.04
SNc	0.02	0.06		0.04	0.02	0.05	0.02	0.08		0.37	0.09	0.06
RN	0.01	0.07		0	0	0.01	0.03	0.08		0.01	0.04	0.04
CUN	0	0		0	0.01	0.01	0	0		0.01	0.02	0.02
PAG	0.17	0.19		0.59	0.17	0.35	0.08	0.14		1.16	0.54	0.29
SCm	0.06	0.1		0.11	0.05	0.26	0.15	0.07		0.29	0.18	0.38
MRN	0.06	0.08		0.11	0.1	0.23	0.08	0.09		0.52	0.19	0.2
SNr	0.06	0.22		0.02	0.11	0.11	0.14	0.43		0.77	1.08	0.13
ZI	0	0.01		0	0	0.01	0.07	0.07		0	0.07	0.02
STN	0	0.01		0.07	0.02	0.01	0.01	0		0.06	0.03	0.01
LHA	0.11	0.15		0.27	0.43	0.6	0.26	0.4		0.41	0.47	0.6
VM	0	0		0.01	0	0.02	0.18	0.64		0.04	0.08	0.06
PALd	0	0		0	0.01	0.07	0.03	0.02		0	0.01	0.01
SSp	4.46	2.23		0.92	2.1	3.27	4.27	3.1		0.98	1.23	1.22
MOs	4.42	2.47		3.04	2.68	5.99	7.35	7.89		2.37	7.1	5.62
MOp	3.01	0.76		0.55	1.38	2.19	3.09	3.21		0.6	1.79	1.62

## Sheet: Efferents
	Sham Afferent Contra			6-OHDA Afferent Contra			Sham Afferent Ipsi			6-OHDA Afferent Contra
PRNr	0.19	0.22		0.08	0.58	0.25	0.12	0.23		0.16	0.36	0.36
TRN	0.02	0.03		0	0.02	0.12	0.01	0.04		0	0.14	0.04
PPN	0	0.01		0.1	0.01	0.03	0.01	0.06		0.58	0.05	0.04
SNc	0.02	0.06		0.04	0.02	0.05	0.02	0.08		0.37	0.09	0.06
RN	0.01	0.07		0	0	0.01	0.03	0.08		0.01	0.04	0.04
CUN	0	0		0	0.01	0.01	0	0		0.01	0.02	0.02
PAG	0.17	0.19		0.59	0.17	0.35	0.08	0.14		1.16	0.54	0.29
SCm	0.06	0.1		0.11	0.05	0.26	0.15	0.07		0.29	0.18	0.38
MRN	0.06	0.08		0.11	0.1	0.23	0.08	0.09		0.52	0.19	0.2
SNr	0.06	0.22		0.02	0.11	0.11	0.14	0.43		0.77	1.08	0.13
ZI	0	0.01		0	0	0.01	0.07	0.07		0	0.07	0.02
STN	0	0.01		0.07	0.02	0.01	0.01	0		0.06	0.03	0.01
LHA	0.11	0.15		0.27	0.43	0.6	0.26	0.4		0.41	0.47	0.6
VM	0	0		0.01	0	0.02	0.18	0.64		0.04	0.08	0.06
PALd	0	0		0	0.01	0.07	0.03	0.02		0	0.01	0.01
SSp	4.46	2.23		0.92	2.1	3.27	4.27	3.1		0.98	1.23	1.22
MOs	4.42	2.47		3.04	2.68	5.99	7.35	7.89		2.37	7.1	5.62
MOp	3.01	0.76		0.55	1.38	2.19	3.09	3.21		0.6	1.79	1.62
